# Supplementary material
Source: PubMed Central journal article supplement (PMC3447740)
Supplement: NIHMS404669-supplement-1_si_001.pdf [file NIHMS404669-supplement-1_si_001.pdf]

# Non-Enzymatic Dynamic Kinetic Resolution of Secondary Alcohols via Enantioselective Acylation: Synthetic and Mechanistic Studies

Sarah Yunmi Lee, Jaclyn M. Murphy, Atsushi Ukai, and Gregory C. Fu

Department of Chemistry, Massachusetts Institute of Technology,  
Cambridge, Massachusetts 02139  
Division of Chemistry and Chemical Engineering, California Institute of Technology,  
Pasadena, California 91125

## Supporting Information

### Table of Contents

|      |                                                   |      |
|------|---------------------------------------------------|------|
| I.   | General Information                               | S-1  |
| II.  | Preparation of Acyl Carbonates                    | S-2  |
| III. | Dynamic Kinetic Resolutions of Secondary Alcohols | S-3  |
| IV.  | Preparation of Ru <sup>OAc</sup>                  | S-8  |
| V.   | Mechanistic/Reactivity Studies                    | S-20 |
| VI.  | <sup>1</sup> H NMR Spectra and GC/HPLC Traces     | S-24 |

### I. General Information

The following reagents were purchased from Aldrich and used as received: KO<sup>t</sup>-Bu, *t*-amyl alcohol (anhydrous), toluene (anhydrous), and NEt<sub>3</sub> (anhydrous). (C<sub>3</sub>Ph<sub>3</sub>)-DMAP\*<sup>1</sup> and Ru<sup>Cl<sub>2</sub></sup> were synthesized as previously described. 1-Phenylethanol, 1-phenyl-1-propanol, 2-methyl-1-phenyl-1-propanol, 1-(2-methylphenyl)ethanol, and Ac<sub>2</sub>O were purchased (Aldrich or Alfa Aesar) and purified by vacuum distillation prior to use. 1-(1-Naphthyl)ethanol was purchased from Aldrich and purified by column chromatography prior to use. The other secondary alcohols have been reported previously and were synthesized either by the addition of a Grignard reagent to an aldehyde or by the reduction of a ketone (purification: column chromatography).

Unless otherwise specified, reactions were conducted with stirring in oven-dried glassware under an atmosphere of nitrogen.

HPLC analyses were carried out on an Agilent 1100 series system equipped with a Daicel CHIRALCEL OD column (internal diameter 4.6 mm, column length 250 mm, particle size 5 μ). GC analyses were obtained on an Agilent 6850 system equipped with a Varian CP-Chirasil-DEX CB column (internal diameter 0.25 mm, column length 25 m).

- 
- (1) Wurz, R. P.; Lee, E. C.; Ruble, J. C.; Fu, G. C. *Adv. Synth. Catal.* **2007**, *349*, 2345–2352.  
(2) Martín-Matute, B.; Edin, M.; Bogár, K.; Kaynak, F. B.; Bäckvall, J.-E. *J. Am. Chem. Soc.* **2005**, *127*, 8817–8825.

## II. Preparation of Acyl Carbonates

The procedures and yields have not been optimized.

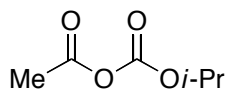

**Acetyl isopropyl carbonate [60059-18-9].** Acetic acid (1.7 mL, 30 mmol) was added via syringe to a 250-mL round-bottom flask that contained anhydrous Et<sub>2</sub>O (60 mL) and NEt<sub>3</sub> (4.2 mL, 30 mmol) at 0 °C. The reaction mixture was stirred for 5 min, and then isopropyl chloroformate (30 mL, 30 mmol; 1.0 M in toluene; Aldrich) was added dropwise via syringe over 10 min. The reaction mixture was stirred at 0 °C for 45 min. Next, an aqueous 10% citric acid solution (30 mL) was added. The organic layer was decanted and then washed with additional citric acid solution (20 mL), a saturated NaHCO<sub>3</sub> solution (30 mL), and brine (30 mL). The organic solvent was evaporated under reduced pressure, and the acyl carbonate was purified by vacuum distillation (30 °C at 500 mtorr), which provided a clear, colorless liquid (2.2 g, 50% yield).

<sup>1</sup>H NMR (400 MHz, CDCl<sub>3</sub>) δ 4.97 (septet, 1H, *J* = 6.4 Hz), 2.19 (s, 3H), 1.33 (d, 6H, *J* = 6.4 Hz).

<sup>13</sup>C NMR (100 MHz, CDCl<sub>3</sub>) δ 165.4, 148.5, 74.5, 21.6, 21.2.

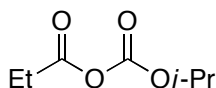

**Propionyl isopropyl carbonate [176438-88-3].** Propionic acid (1.2 mL, 15 mmol) was added via syringe to a 250-mL round-bottom flask that contained anhydrous Et<sub>2</sub>O (30 mL) and NEt<sub>3</sub> (2.1 mL, 15 mmol) at 0 °C. The reaction mixture was stirred for 5 min, and then isopropyl chloroformate (15 mL, 15 mmol; 1.0 M in toluene; Aldrich) was added dropwise via syringe over 10 min. The reaction mixture was stirred at 0 °C for 45 min. Next, an aqueous 10% citric acid solution (15 mL) was added. The organic layer was decanted and then washed with additional citric acid solution (10 mL), a saturated NaHCO<sub>3</sub> solution (15 mL), and brine (15 mL). The organic solvent was evaporated under reduced pressure, and the acyl carbonate was purified by vacuum distillation (27 °C at 450 mtorr), which provided a clear, colorless liquid (1.1 g, 46% yield).

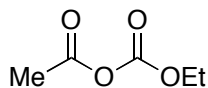

**Acetyl ethyl carbonate [15890-77-4].** Acetic acid (0.85 mL, 15 mmol) was added via syringe to a 250-mL round-bottom flask that contained anhydrous Et<sub>2</sub>O (30 mL) and NEt<sub>3</sub> (2.1 mL, 15 mmol) at 0 °C. The reaction mixture was stirred for 5 min, and then ethyl chloroformate (1.4 mL, 15 mmol) was added dropwise via syringe over 10 min. The reaction mixture was stirred at 0 °C for 45 min. Next, an aqueous 10% citric acid solution (15 mL) was added. The organic layer was decanted and then washed with additional citric acid solution (10 mL), a saturated NaHCO<sub>3</sub> solution (15 mL), and brine (15 mL). The organic solvent was evaporated under reduced pressure, which provided a clear, colorless liquid (1.3 g, 66% yield).

<sup>1</sup>H NMR (400 MHz, CDCl<sub>3</sub>) δ 4.30 (quartet, 2H, *J* = 6.9 Hz), 2.19 (s, 3H), 1.34 (t, 3H, *J* = 6.9 Hz).

$^{13}\text{C}$  NMR (100 MHz,  $\text{CDCl}_3$ )  $\delta$  165.1, 148.9, 65.6, 21.0, 13.9.

### III. Dynamic Kinetic Resolutions of Secondary Alcohols

**General procedure.** In a nitrogen-filled glovebox (for a glovebox-free procedure, see below),  $\text{Ru}^{\text{Cl}}$  (16.6 mg, 0.026 mmol),  $\text{KO}t\text{-Bu}$  (2.5 mg, 0.022 mmol), toluene (100  $\mu\text{L}$ ), and *t*-amyl alcohol (150  $\mu\text{L}$ ) were combined in an oven-dried 4-mL vial equipped with a stir bar. The resulting mixture was stirred at r.t. for 6 min, and then the alcohol (0.50 mmol) and (+)- $(\text{C}_5\text{Ph}_5)\text{-DMAP}^*$  (3.3 mg in 50  $\mu\text{L}$  toluene, 0.0050 mmol) were added to the vial. The vial was then capped with a septum-lined cap, removed from the glovebox, and cooled to 10  $^\circ\text{C}$ . After cooling the solution for 10 min, acetyl isopropyl carbonate (108  $\mu\text{L}$ , 0.750 mmol) was added dropwise to the vial via syringe pump over 20 h (Notes: For optimal results, the tip of the needle should be aligned such that the acetyl isopropyl carbonate drips down the wall of the vial. Some grease was applied to the septum around the needle, to discourage moisture/air from entering the vial during the addition.). The reaction mixture was stirred at 10  $^\circ\text{C}$  for an additional 28 h. To remove the (+)- $(\text{C}_5\text{Ph}_5)\text{-DMAP}^*$ , the mixture was then filtered through a plug of silica gel using  $\text{Et}_2\text{O}$  (10 mL) as the eluant, and the volatiles were removed under reduced pressure with minimal heat (to minimize evaporation of the products, since some are volatile). To remove a trace of a colored impurity, the residue was dissolved in  $\text{CH}_2\text{Cl}_2$  (20 mL),  $\text{H}_2\text{O}$  (20 mL), and a 70% aqueous solution of *t*-BuOOH (2 mL). This mixture was stirred at r.t. for 2 h, and the product was isolated by extraction into  $\text{CH}_2\text{Cl}_2$  (3 x 50 mL). The  $\text{CH}_2\text{Cl}_2$  layers were combined and dried over  $\text{MgSO}_4$ , and the solvent was removed under reduced pressure. The product was purified by column chromatography (hexanes  $\rightarrow$  20%  $\text{Et}_2\text{O}$  in hexanes).

**Notes:** For the sake of convenience, the DKRs were set up in a glovebox. However, this method does *not* require the use of a glovebox (see the next procedure).

For the alcohol illustrated in entry 1 of Table 1, the DKR proceeded in 81% ee and 88% yield when the acetyl isopropyl carbonate was added dropwise over 1 min, rather than by syringe pump over 20 h.

**Glovebox-free procedure.**  $\text{Ru}^{\text{Cl}}$  (16.6 mg, 0.026 mmol) and  $\text{KO}t\text{-Bu}$  (2.5 mg, 0.022 mmol) were added to an oven-dried 4-mL vial. The vial was capped, and then it was evacuated and backfilled with nitrogen (three cycles). Toluene (100  $\mu\text{L}$ ) and *t*-amyl alcohol (150  $\mu\text{L}$ ) were added via syringe, and the resulting solution was stirred at r.t. for 6 min. (+)- $(\text{C}_5\text{Ph}_5)\text{-DMAP}^*$  (3.3 mg, 0.0050 mmol) was added to another oven-dried 4-mL vial, and this vial was capped, and then it was evacuated and backfilled with nitrogen (three cycles); next, toluene (50  $\mu\text{L}$ ) was added. The alcohol (0.50 mmol) and the solution of (+)- $(\text{C}_5\text{Ph}_5)\text{-DMAP}^*$  were added in turn by syringe to the vial containing  $\text{Ru}^{\text{Cl}}$ . The resulting mixture was cooled to 10  $^\circ\text{C}$ . The remainder of the procedure (addition of acetyl isopropyl carbonate onward) follows the general procedure.

This procedure provided 86% ee and 95% yield for the DKR illustrated in entry 1 of Table 1, and it furnished 90% ee and 97% yield for the DKR depicted in entry 2 of Table 1.

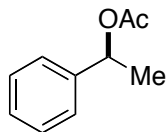

**(S)-1-Phenylethyl acetate (Table 1, entry 1) [16197-93-6].** The title compound was prepared according to the general procedure, using 1-phenylethanol (61 mg, 0.50 mmol). After purification by column chromatography (hexanes → 20% Et<sub>2</sub>O in hexanes), the title compound was isolated as a clear, colorless oil (70 mg, 85% yield; 95% calibrated GC yield) with 86% ee (GC analysis of the product: CP-Chirasil-DEX CB; heating program: 105 °C → 115 °C @ 1 °C/min, followed by 115 → 175 °C @ 5 °C/min; He flow rate: 1.0 ml/min; retention times: 6.5 min (major), 7.2 min (minor)).

The second run was performed with (–)-(C<sub>3</sub>Ph<sub>3</sub>)-DMAP\*. The product was isolated as a clear, colorless oil (69 mg, 84% yield; 95% calibrated GC yield) with 87% ee.

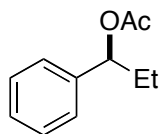

**(S)-1-Phenylpropyl acetate (Table 1, entry 2) [83860-48-4].** The title compound was prepared according to the general procedure, using 1-phenylpropanol (68 mg, 0.50 mmol). After purification by column chromatography (hexanes → 20% Et<sub>2</sub>O in hexanes), the title compound was isolated as a clear, colorless oil (82 mg, 92% yield; 95% calibrated GC yield) with 90% ee (GC analysis of the product: CP-Chirasil-DEX CB; heating program: 105 °C → 115 °C @ 0.5 °C/min, followed by 115 → 175 °C @ 5 °C/min; He flow rate: 1.0 ml/min; retention times: 9.3 min (major), 9.9 min (minor)).

The second run was performed with (–)-(C<sub>3</sub>Ph<sub>3</sub>)-DMAP\*. The product was isolated as a clear, colorless oil (86 mg, 97% yield; 97% calibrated GC yield) with 90% ee.

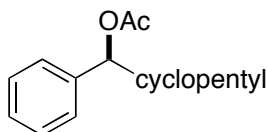

**(S)-Cyclopentyl(phenyl) acetate (Table 1, entry 3).** The title compound was prepared according to the general procedure, using cyclopentyl(phenyl)methanol (88 mg, 0.50 mmol). After purification by column chromatography (hexanes → 20% Et<sub>2</sub>O in hexanes), the title compound was isolated as a clear, colorless oil (94 mg, 86% yield; 91% calibrated GC yield) with 82% ee (HPLC analysis of the product: Daicel CHIRALCEL OD-H column; solvent system: hexanes; 1.0 mL/min; retention times: 20.2 min (minor), 41.2 min (major)).

The second run was performed with (–)-(C<sub>3</sub>Ph<sub>3</sub>)-DMAP\*. The product was isolated as a clear, colorless oil (94 mg, 86% yield; 88% calibrated GC yield) with 81% ee.

<sup>1</sup>H NMR (400 MHz, CDCl<sub>3</sub>) δ 7.33–7.29 (m, 4H), 7.29–7.25 (m, 1H), 5.52 (d, 1H, *J* = 9.2 Hz), 2.34 (sextet, 1H, *J* = 8.4 Hz), 2.03 (s, 3H), 1.84–1.77 (m, 1H), 1.67–1.52 (m, 3H), 1.50–1.44 (m, 1H), 1.42–1.36 (m, 2H), 1.18–1.09 (m, 1H).

<sup>13</sup>C NMR (100 MHz, CDCl<sub>3</sub>) δ 170.6, 140.8, 128.4, 127.9, 127.2, 80.1, 45.6, 29.8, 29.3, 25.37, 25.35, 21.5.

IR (film) 3033, 2956, 2870, 1739, 1496, 1454, 1371, 1237, 1022, 965, 903, 761, 700 cm<sup>-1</sup>.

MS (EI) *m/z* (M<sup>+</sup>) calcd for C<sub>14</sub>H<sub>18</sub>O<sub>2</sub>: 218, found: 218.

$[\alpha]_D^{24} = -43^\circ$  ( $c = 1.0$ ,  $\text{CH}_2\text{Cl}_2$ ; obtained with (+)- $(\text{C}_3\text{Ph}_3)\text{-DMAP}^*$ ).

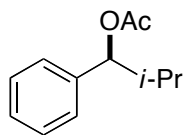

**(S)-2-Methyl-1-phenylpropyl acetate (Table 1, entry 4) [84194-67-2].** The title compound was prepared according to the general procedure, using 2-methyl-1-phenylpropanol (75 mg, 0.50 mmol). After purification by column chromatography (hexanes  $\rightarrow$  20%  $\text{Et}_2\text{O}$  in hexanes), the title compound was isolated as a clear, colorless oil (91 mg, 95% yield; 98% calibrated GC yield) with 90% ee (GC analysis of the product: CP-Chirasil-DEX CB; heating program: 105  $^\circ\text{C}$   $\rightarrow$  115  $^\circ\text{C}$  @ 0.5  $^\circ\text{C}/\text{min}$ , followed by 115  $\rightarrow$  175  $^\circ\text{C}$  @ 5  $^\circ\text{C}/\text{min}$ ; He flow rate: 1.0 ml/min; retention times: 10.7 min (major), 11.3 min (minor)).

The second run was performed with (-)- $(\text{C}_3\text{Ph}_3)\text{-DMAP}^*$ . The product was isolated as a clear, colorless oil (90 mg, 94% yield; 97% calibrated GC yield) with 91% ee.

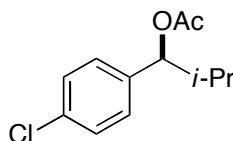

**(S)-2-Methyl-1-(4-chlorophenyl)propyl acetate (Table 1, entry 5) [137408-30-1].** The title compound was prepared according to the general procedure, using 2-methyl-1-(4-chlorophenyl)propanol (92 mg, 0.50 mmol). After purification by column chromatography (hexanes  $\rightarrow$  20%  $\text{Et}_2\text{O}$  in hexanes), the title compound was isolated as a clear, colorless oil (100 mg, 88% yield; 87% calibrated GC yield) with 85% ee (GC analysis of the product: CP-Chirasil-DEX CB; heating program: 105  $^\circ\text{C}$   $\rightarrow$  115  $^\circ\text{C}$  @ 1  $^\circ\text{C}/\text{min}$ , followed by 115  $\rightarrow$  175  $^\circ\text{C}$  @ 5  $^\circ\text{C}/\text{min}$ ; He flow rate: 1.0 ml/min; retention times: 17.2 min (major), 17.5 min (minor)).

The second run was performed with (-)- $(\text{C}_3\text{Ph}_3)\text{-DMAP}^*$ . The product was isolated as a clear, colorless oil (100 mg, 88% yield; 90% calibrated GC yield) with 85% ee.

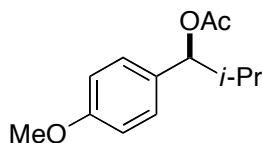

**(S)-2-Methyl-1-(4-methoxyphenyl)propyl acetate (Table 1, entry 6).** The title compound was prepared according to the general procedure, using 2-methyl-1-(4-methoxyphenyl)propanol (90 mg, 0.50 mmol). After purification by column chromatography (hexanes  $\rightarrow$  20%  $\text{Et}_2\text{O}$  in hexanes), the title compound was isolated as a white solid (103 mg, 93% yield; 95% calibrated GC yield) with 86% ee (GC analysis of the product: CP-Chirasil-DEX CB; heating program: 105  $^\circ\text{C}$   $\rightarrow$  115  $^\circ\text{C}$  @ 0.5  $^\circ\text{C}/\text{min}$ , followed by 115  $\rightarrow$  175  $^\circ\text{C}$  @ 5  $^\circ\text{C}/\text{min}$ ; He flow rate: 1.0 ml/min; retention times: 27.5 min (major), 27.8 min (minor)).

The second run was performed with (-)- $(\text{C}_3\text{Ph}_3)\text{-DMAP}^*$ . The product was isolated as a white solid (100 mg, 90% yield; 90% calibrated GC yield) with 89% ee.

$^1\text{H}$  NMR (400 MHz,  $\text{CDCl}_3$ )  $\delta$  7.22 (d, 2H,  $J = 8.8$  Hz), 6.85 (d, 2H,  $J = 8.4$  Hz), 5.39 (d, 1H,  $J = 8.0$  Hz), 3.79 (s, 3H), 2.09–2.02 (m, 4H), 0.96 (d, 3H,  $J = 6.8$  Hz), 0.76 (d, 3H,  $J = 6.8$  Hz).

$^{13}\text{C}$  NMR (100 MHz,  $\text{CDCl}_3$ )  $\delta$  170.5, 159.2, 132.0, 128.5, 113.7, 80.9, 55.3, 33.5, 21.4, 19.4, 18.8.

IR (film) 2965, 2873, 1724, 1676, 1606, 1515, 1474, 1456, 1377, 1298, 1244, 1177, 1104, 1032, 1016, 975, 903, 832, 812  $\text{cm}^{-1}$ .

MS (EI)  $m/z$  ( $\text{M}^+$ ) calcd for  $\text{C}_{13}\text{H}_{18}\text{O}_3$ : 222, found: 222.

$[\alpha]_D^{24} = -43^\circ$  ( $c = 1.0$ ,  $\text{CH}_2\text{Cl}_2$ ; obtained with (+)- $(\text{C}_3\text{Ph}_3)\text{-DMAP}^*$ ).

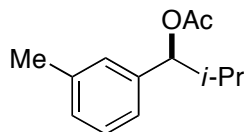

**(S)-2-Methyl-1-(3-Methylphenyl)propyl acetate (Table 1, entry 7).** The title compound was prepared according to the general procedure, using 2-methyl-1-(3-methyl)phenylpropanol (82 mg, 0.50 mmol). After purification by column chromatography (hexanes  $\rightarrow$  20%  $\text{Et}_2\text{O}$  in hexanes), the title compound was isolated as a clear, colorless oil (99 mg, 96% yield; 96% calibrated GC yield) with 90% ee (GC analysis of the product: CP-Chirasil-DEX CB; heating program: 105  $^\circ\text{C}$   $\rightarrow$  115  $^\circ\text{C}$  @ 0.5  $^\circ\text{C}/\text{min}$ , followed by 115  $\rightarrow$  175  $^\circ\text{C}$  @ 5  $^\circ\text{C}/\text{min}$ ; He flow rate: 1.0 ml/min; retention times: 14.9 min (major), 15.8 min (minor)).

The second run was performed with (–)- $(\text{C}_3\text{Ph}_3)\text{-DMAP}^*$ . The product was isolated as a clear, colorless oil (99 mg, 96% yield; 97% calibrated GC yield) with 91% ee.

$^1\text{H}$  NMR (400 MHz,  $\text{CDCl}_3$ )  $\delta$  7.24–7.20 (m, 1H), 7.10–7.08 (m, 3H), 5.43 (d, 1H,  $J = 7.6$  Hz), 2.35 (s, 3H), 2.13–2.05 (m, 4H), 0.97 (d, 3H,  $J = 6.8$  Hz), 0.80 (d, 3H,  $J = 6.8$  Hz).

$^{13}\text{C}$  NMR (100 MHz,  $\text{CDCl}_3$ )  $\delta$  170.5, 139.8, 137.8, 128.5, 128.1, 127.9, 124.2, 81.1, 33.6, 21.6, 21.3, 18.9, 18.6.

IR (film) 2964, 2875, 1736, 1686, 1610, 1450, 1371, 1237, 1160, 1023, 980, 908, 785, 705  $\text{cm}^{-1}$ .

MS (EI)  $m/z$  ( $\text{M}^+$ ) calcd for  $\text{C}_{13}\text{H}_{18}\text{O}_2$ : 206, found: 206.

$[\alpha]_D^{24} = -47^\circ$  ( $c = 1.0$ ,  $\text{CH}_2\text{Cl}_2$ ; obtained with (+)- $(\text{C}_3\text{Ph}_3)\text{-DMAP}^*$ ).

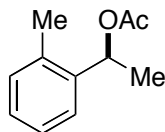

**(S)-1-(2-Methylphenyl)ethyl acetate (Table 1, entry 8) [501659-37-6].** The title compound was prepared according to the general procedure, using 1-(2-methyl)phenylethanol (68 mg, 0.50 mmol). After purification by column chromatography (hexanes  $\rightarrow$  20%  $\text{Et}_2\text{O}$  in hexanes), the title compound was isolated as a clear, colorless oil (86 mg, 96% yield; 99% calibrated GC yield) with 93% ee (GC analysis of the product: CP-Chirasil-DEX CB; heating program: 90  $^\circ\text{C}$   $\rightarrow$  115  $^\circ\text{C}$  @ 0.5  $^\circ\text{C}/\text{min}$ , followed by 115  $\rightarrow$  175  $^\circ\text{C}$  @ 5  $^\circ\text{C}/\text{min}$ ; He flow rate: 0.7 ml/min; retention times: 20.7 min (major), 21.5 min (minor)).

The second run was performed with (–)- $(\text{C}_3\text{Ph}_3)\text{-DMAP}^*$ . The product was isolated as a clear, colorless oil (78 mg, 87% yield; 94% calibrated GC yield) with 92% ee.

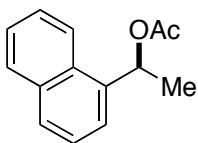

**(S)-1-(1-naphthyl)ethyl acetate (Table 1, entry 9) [16197-95-8].** The title compound was prepared according to the general procedure, using 1-(1-naphthyl)ethanol (86 mg, 0.50 mmol). After purification by column chromatography (hexanes → 20% Et<sub>2</sub>O in hexanes), the title compound was isolated as a clear, colorless oil (103 mg, 96% yield; 99% calibrated GC yield) with 89% ee (HPLC analysis of the product: Daicel CHIRALCEL OD-H column; solvent system: 1.0% *i*-PrOH in hexanes; 1.0 mL/min; retention times: 9.4 min (minor), 14.4 min (major)).

The second run was performed with (–)-(C<sub>5</sub>Ph<sub>5</sub>)-DMAP\*. The product was isolated as a clear, colorless oil (98 mg, 91% yield; 99% calibrated GC yield) with 91% ee.

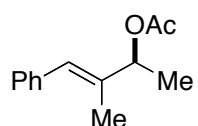

**(S,E)-3-Methyl-4-phenylbut-3-en-2-yl acetate (Table 1, entry 10) [187736-05-6].** The title compound was prepared according to the general procedure, using (*E*)-3-methyl-4-phenylbut-3-en-2-ol (81 mg, 0.50 mmol). After purification by column chromatography (hexanes → 20% Et<sub>2</sub>O in hexanes), the title compound was isolated as a clear, colorless oil (98 mg, 96% yield; 95% calibrated GC yield) with 89% ee (HPLC analysis of the product: Daicel CHIRALCEL OD-H column; solvent system: 1.0% *i*-PrOH in hexanes; 1.0 mL/min; retention times: 5.9 min (major), 7.5 min (minor)).

The second run was performed with (–)-(C<sub>5</sub>Ph<sub>5</sub>)-DMAP\*. The product was isolated as a clear, colorless oil (85 mg, 83% yield; 99% calibrated GC yield) with 88% ee.

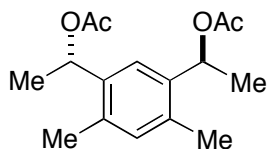

**(1S,1'S)-1,1'-(4,6-Dimethyl-1,3-phenylene)bis(ethane-1,1-diyl) diacetate (eq 10) [205104-01-4 for the (1R,1'R) enantiomer].** In a nitrogen-filled glovebox, Ru<sup>Cl</sup> (33.2 mg, 0.052 mmol), KO*t*-Bu (4.9 mg, 0.044 mmol), toluene (200 μL), and *t*-amyl alcohol (300 μL) were combined in an oven-dried 4-mL vial equipped with a stir bar. The resulting mixture was stirred at r.t. for 6 min, and then the alcohol (0.50 mmol) and (+)-(C<sub>5</sub>Ph<sub>5</sub>)-DMAP\* (6.6 mg in 100 μL toluene, 0.010 mmol) were added to the vial. The vial was then capped with a septum-lined cap, removed from the glovebox, and cooled to 10 °C. After cooling the solution for 10 min, acetyl isopropyl carbonate (216 μL, 1.50 mmol) was added dropwise to the vial via syringe pump over 20 h (Notes: For optimal results, the tip of the needle should be aligned such that the acetyl isopropyl carbonate drips down the wall of the vial. Some grease was applied to the septum around the needle, to discourage moisture/air from entering the vial during the addition.). The reaction mixture was stirred at 10 °C for an additional 28 h. To remove the (+)-(C<sub>5</sub>Ph<sub>5</sub>)-DMAP\*, the mixture was then filtered through a plug of silica gel using Et<sub>2</sub>O (15 mL) as the eluant, and the volatiles were removed under reduced pressure. To remove a trace of a colored impurity, the residue was dissolved in CH<sub>2</sub>Cl<sub>2</sub> (40 mL), H<sub>2</sub>O (40 mL), and a 70% aqueous

solution of *t*-BuOOH (4 mL). This mixture was stirred at r.t. for 2 h, and the product was isolated by extraction into CH<sub>2</sub>Cl<sub>2</sub> (3 x 50 mL). The CH<sub>2</sub>Cl<sub>2</sub> layers were combined and dried over MgSO<sub>4</sub>, and the solvent was removed under reduced pressure. The product was purified by column chromatography (hexanes → 20% Et<sub>2</sub>O in hexanes), which furnished a mixture of the *d,l* and the meso diacetates (126 mg, 91% yield; dr: 7:1) as a clear, colorless oil. The diastereomers were separated by column chromatography (hexanes → 10% Et<sub>2</sub>O in hexanes), which afforded the pure *d,l* diacetate (111 mg, 80% yield) with 99% ee.

The ee of the product was determined after deacetylation to the diol (HPLC analysis of the diol: Daicel CHIRALCEL OD-H column; solvent system: 5.0% *i*-PrOH in hexanes; 1.0 mL/min; retention times: 17.0 min (major), 28.0 min (minor)).

The second run was performed with (–)-(C<sub>5</sub>Ph<sub>5</sub>)-DMAP\*. The mixture of the *d,l* and the meso diacetates was isolated as a clear, colorless oil (128 mg, 92% yield; dr: 7:1). An additional column chromatography afforded the pure *d,l* diacetate (110 mg, 79% yield) with 99% ee.

The spectral data match those described in the literature.<sup>3</sup>

[α]<sub>D</sub><sup>24</sup> = –94° (c = 1.0, CH<sub>2</sub>Cl<sub>2</sub>; obtained with (+)-(C<sub>5</sub>Ph<sub>5</sub>)-DMAP\*).

#### IV. Preparation of Ru<sup>OAc</sup>

**Synthesis of Ru<sup>OAc</sup>.** In a nitrogen-filled glovebox, Ru<sup>Cl</sup> (100 mg, 0.157 mmol), KO<sup>*t*</sup>-Bu (17.6 mg, 0.157 mmol), and toluene (2.5 mL) were combined in an oven-dried 20-mL vial equipped with a stir bar. The mixture was stirred at r.t. for 6 min, and then Ac<sub>2</sub>O (151 μL, 1.60 mmol) was added to the vial via syringe. The resulting solution was stirred at r.t. for 12 h. Next, the volatiles were removed under reduced pressure, and the residue was purified by column chromatography (20% Et<sub>2</sub>O in hexanes → 50% Et<sub>2</sub>O in hexanes), which furnished the title compound as a yellow solid (74 mg, 71% yield; not optimized).

<sup>1</sup>H NMR (400 MHz, CDCl<sub>3</sub>) δ 7.21–7.17 (m, 5H), 7.10–7.06 (m, 10H), 6.99–6.97 (m, 10H), 2.00 (s, 3H).

<sup>13</sup>C NMR (100 MHz, CDCl<sub>3</sub>) δ 198.2, 177.5, 132.2, 130.0, 128.3, 127.9, 106.0, 23.1.

IR (film) 3060, 2039, 1989, 1623, 1601, 1503, 1445, 1361, 1309, 1183, 1075, 1028, 803, 785, 743, 699, 675, 561 cm<sup>–1</sup>.

**Structure determination of Ru<sup>OAc</sup> by X-ray crystallography.** X-ray quality crystals were obtained by slowly evaporating CH<sub>2</sub>Cl<sub>2</sub> from a saturated solution of Ru<sup>OAc</sup>.

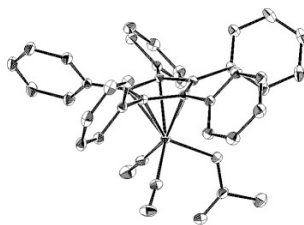

The crystal contained ca. 5% (η<sup>5</sup>-C<sub>5</sub>Ph<sub>5</sub>)Ru(CO)<sub>2</sub>Cl, which is omitted for clarity.

(3) Ruble, J. C.; Tweddell, J.; Fu, G. C. *J. Org. Chem.* **1998**, *63*, 2794–2795.



Table 1. Crystal data and structure refinement for X11159.

|                                   |                                             |                    |
|-----------------------------------|---------------------------------------------|--------------------|
| Identification code               | x11159                                      |                    |
| Empirical formula                 | C38.91 H27.86 Cl0.05 O3.91 Ru               |                    |
| Formula weight                    | 660.56                                      |                    |
| Temperature                       | 100(2) K                                    |                    |
| Wavelength                        | 0.71073 Å                                   |                    |
| Crystal system                    | Monoclinic                                  |                    |
| Space group                       | P2(1)/c                                     |                    |
| Unit cell dimensions              | a = 19.5003(10) Å                           | a = 90°.           |
|                                   | b = 10.5810(5) Å                            | b = 104.8110(10)°. |
|                                   | c = 14.9192(8) Å                            | g = 90°.           |
| Volume                            | 2976.0(3) Å <sup>3</sup>                    |                    |
| Z                                 | 4                                           |                    |
| Density (calculated)              | 1.474 Mg/m <sup>3</sup>                     |                    |
| Absorption coefficient            | 0.573 mm <sup>-1</sup>                      |                    |
| F(000)                            | 1349                                        |                    |
| Crystal size                      | 0.45 x 0.20 x 0.08 mm <sup>3</sup>          |                    |
| Theta range for data collection   | 2.16 to 29.94°.                             |                    |
| Index ranges                      | -27<=h<=27, -14<=k<=14, -20<=l<=20          |                    |
| Reflections collected             | 116985                                      |                    |
| Independent reflections           | 8640 [R(int) = 0.0289]                      |                    |
| Completeness to theta = 29.94°    | 100.0 %                                     |                    |
| Absorption correction             | Semi-empirical from equivalents             |                    |
| Max. and min. transmission        | 0.9556 and 0.7825                           |                    |
| Refinement method                 | Full-matrix least-squares on F <sup>2</sup> |                    |
| Data / restraints / parameters    | 8640 / 110 / 426                            |                    |
| Goodness-of-fit on F <sup>2</sup> | 1.057                                       |                    |
| Final R indices [I>2sigma(I)]     | R1 = 0.0212, wR2 = 0.0548                   |                    |
| R indices (all data)              | R1 = 0.0234, wR2 = 0.0564                   |                    |
| Largest diff. peak and hole       | 0.455 and -0.642 e. Å <sup>-3</sup>         |                    |

Table 2. Atomic coordinates (x 10<sup>4</sup>) and equivalent isotropic displacement parameters (Å<sup>2</sup>x 10<sup>3</sup>) for X11159. U(eq) is defined as one third of the trace of the orthogonalized U<sup>ij</sup> tensor.

|       | x       | y       | z       | U(eq) |
|-------|---------|---------|---------|-------|
| Ru(1) | 2599(1) | 6419(1) | 4071(1) | 12(1) |
| C(1)  | 2032(1) | 6959(1) | 5182(1) | 13(1) |
| C(11) | 1295(1) | 6702(1) | 5227(1) | 14(1) |

|       |         |          |         |       |
|-------|---------|----------|---------|-------|
| C(12) | 1184(1) | 6442(1)  | 6096(1) | 18(1) |
| C(13) | 498(1)  | 6319(1)  | 6203(1) | 23(1) |
| C(14) | -79(1)  | 6446(1)  | 5441(1) | 24(1) |
| C(15) | 27(1)   | 6702(1)  | 4574(1) | 22(1) |
| C(16) | 711(1)  | 6835(1)  | 4462(1) | 18(1) |
| C(2)  | 2637(1) | 6192(1)  | 5573(1) | 12(1) |
| C(21) | 2624(1) | 4928(1)  | 5997(1) | 13(1) |
| C(22) | 3065(1) | 4642(1)  | 6872(1) | 16(1) |
| C(23) | 3045(1) | 3444(1)  | 7254(1) | 18(1) |
| C(24) | 2590(1) | 2525(1)  | 6774(1) | 19(1) |
| C(25) | 2148(1) | 2801(1)  | 5904(1) | 19(1) |
| C(26) | 2166(1) | 3992(1)  | 5520(1) | 16(1) |
| C(3)  | 3266(1) | 6879(1)  | 5477(1) | 13(1) |
| C(31) | 4013(1) | 6568(1)  | 5960(1) | 14(1) |
| C(32) | 4391(1) | 7425(1)  | 6614(1) | 18(1) |
| C(33) | 5066(1) | 7131(1)  | 7154(1) | 23(1) |
| C(34) | 5375(1) | 5981(2)  | 7044(1) | 25(1) |
| C(35) | 5013(1) | 5133(1)  | 6382(1) | 25(1) |
| C(36) | 4333(1) | 5422(1)  | 5845(1) | 20(1) |
| C(4)  | 3026(1) | 8042(1)  | 5007(1) | 13(1) |
| C(41) | 3462(1) | 9143(1)  | 4874(1) | 14(1) |
| C(42) | 3363(1) | 10269(1) | 5316(1) | 18(1) |
| C(43) | 3737(1) | 11353(1) | 5205(1) | 22(1) |
| C(44) | 4208(1) | 11324(1) | 4646(1) | 22(1) |
| C(45) | 4311(1) | 10208(1) | 4210(1) | 20(1) |
| C(46) | 3944(1) | 9115(1)  | 4328(1) | 17(1) |
| C(5)  | 2260(1) | 8081(1)  | 4794(1) | 13(1) |
| C(51) | 1809(1) | 9156(1)  | 4354(1) | 14(1) |
| C(52) | 1898(1) | 9718(1)  | 3544(1) | 18(1) |
| C(53) | 1474(1) | 10728(1) | 3139(1) | 22(1) |
| C(54) | 954(1)  | 11184(1) | 3538(1) | 22(1) |
| C(55) | 868(1)  | 10645(1) | 4352(1) | 20(1) |
| C(56) | 1296(1) | 9642(1)  | 4763(1) | 16(1) |
| C(8)  | 3019(1) | 4851(1)  | 3902(1) | 19(1) |
| O(3)  | 3271(1) | 3900(1)  | 3830(1) | 29(1) |
| O(1)  | 1638(1) | 5699(1)  | 3315(1) | 22(1) |
| C(6)  | 1556(1) | 5270(1)  | 2481(1) | 20(1) |
| O(2)  | 2007(1) | 5300(1)  | 2041(1) | 23(1) |
| C(7)  | 839(1)  | 4676(2)  | 2083(1) | 40(1) |

|        |          |          |          |       |
|--------|----------|----------|----------|-------|
| C(9A)  | 1735(14) | 6050(30) | 3110(20) | 22(5) |
| O(4A)  | 1230(11) | 5740(30) | 2537(16) | 42(6) |
| C(9)   | 2849(1)  | 7030(1)  | 3004(1)  | 18(1) |
| O(4)   | 3046(1)  | 7430(1)  | 2409(1)  | 27(1) |
| Cl(1A) | 3017(5)  | 7011(10) | 2694(7)  | 26(2) |

---

Table 3. Bond lengths [Å] and angles [°] for X11159.

---

|              |            |
|--------------|------------|
| Ru(1)-C(9)   | 1.894(2)   |
| Ru(1)-C(8)   | 1.8955(13) |
| Ru(1)-C(9A)  | 1.953(14)  |
| Ru(1)-O(1)   | 2.0689(11) |
| Ru(1)-C(3)   | 2.2213(11) |
| Ru(1)-C(4)   | 2.2360(11) |
| Ru(1)-C(2)   | 2.2363(11) |
| Ru(1)-C(5)   | 2.2487(11) |
| Ru(1)-C(1)   | 2.2880(11) |
| Ru(1)-Cl(1A) | 2.477(11)  |
| C(1)-C(2)    | 1.4290(15) |
| C(1)-C(5)    | 1.4403(16) |
| C(1)-C(11)   | 1.4802(15) |
| C(11)-C(12)  | 1.3950(17) |
| C(11)-C(16)  | 1.3984(16) |
| C(12)-C(13)  | 1.3932(17) |
| C(12)-H(12)  | 0.9500     |
| C(13)-C(14)  | 1.387(2)   |
| C(13)-H(13)  | 0.9500     |
| C(14)-C(15)  | 1.387(2)   |
| C(14)-H(14)  | 0.9500     |
| C(15)-C(16)  | 1.3919(17) |
| C(15)-H(15)  | 0.9500     |
| C(16)-H(16)  | 0.9500     |
| C(2)-C(3)    | 1.4630(15) |
| C(2)-C(21)   | 1.4830(16) |
| C(21)-C(22)  | 1.3992(16) |
| C(21)-C(26)  | 1.4002(16) |
| C(22)-C(23)  | 1.3945(16) |
| C(22)-H(22)  | 0.9500     |
| C(23)-C(24)  | 1.3864(18) |

|             |            |
|-------------|------------|
| C(23)-H(23) | 0.9500     |
| C(24)-C(25) | 1.3925(17) |
| C(24)-H(24) | 0.9500     |
| C(25)-C(26) | 1.3882(17) |
| C(25)-H(25) | 0.9500     |
| C(26)-H(26) | 0.9500     |
| C(3)-C(4)   | 1.4342(16) |
| C(3)-C(31)  | 1.4882(16) |
| C(31)-C(36) | 1.3941(17) |
| C(31)-C(32) | 1.3968(17) |
| C(32)-C(33) | 1.3922(17) |
| C(32)-H(32) | 0.9500     |
| C(33)-C(34) | 1.387(2)   |
| C(33)-H(33) | 0.9500     |
| C(34)-C(35) | 1.387(2)   |
| C(34)-H(34) | 0.9500     |
| C(35)-C(36) | 1.3965(18) |
| C(35)-H(35) | 0.9500     |
| C(36)-H(36) | 0.9500     |
| C(4)-C(5)   | 1.4459(15) |
| C(4)-C(41)  | 1.4841(16) |
| C(41)-C(46) | 1.3939(16) |
| C(41)-C(42) | 1.3984(17) |
| C(42)-C(43) | 1.3912(17) |
| C(42)-H(42) | 0.9500     |
| C(43)-C(44) | 1.389(2)   |
| C(43)-H(43) | 0.9500     |
| C(44)-C(45) | 1.387(2)   |
| C(44)-H(44) | 0.9500     |
| C(45)-C(46) | 1.3936(17) |
| C(45)-H(45) | 0.9500     |
| C(46)-H(46) | 0.9500     |
| C(5)-C(51)  | 1.4839(16) |
| C(51)-C(52) | 1.3953(16) |
| C(51)-C(56) | 1.3977(16) |
| C(52)-C(53) | 1.3910(17) |
| C(52)-H(52) | 0.9500     |
| C(53)-C(54) | 1.3871(19) |
| C(53)-H(53) | 0.9500     |

|                  |            |
|------------------|------------|
| C(54)-C(55)      | 1.3900(19) |
| C(54)-H(54)      | 0.9500     |
| C(55)-C(56)      | 1.3913(17) |
| C(55)-H(55)      | 0.9500     |
| C(56)-H(56)      | 0.9500     |
| C(8)-O(3)        | 1.1362(16) |
| O(1)-C(6)        | 1.2951(17) |
| C(6)-O(2)        | 1.2237(18) |
| C(6)-C(7)        | 1.510(2)   |
| C(7)-H(7A)       | 0.9800     |
| C(7)-H(7B)       | 0.9800     |
| C(7)-H(7C)       | 0.9800     |
| C(9A)-O(4A)      | 1.171(15)  |
| C(9)-O(4)        | 1.134(3)   |
|                  |            |
| C(9)-Ru(1)-C(8)  | 88.49(6)   |
| C(9)-Ru(1)-C(9A) | 79.0(12)   |
| C(8)-Ru(1)-C(9A) | 92.8(12)   |
| C(9)-Ru(1)-O(1)  | 93.43(6)   |
| C(8)-Ru(1)-O(1)  | 88.15(5)   |
| C(9A)-Ru(1)-O(1) | 15.3(11)   |
| C(9)-Ru(1)-C(3)  | 120.25(5)  |
| C(8)-Ru(1)-C(3)  | 98.56(5)   |
| C(9A)-Ru(1)-C(3) | 157.6(13)  |
| O(1)-Ru(1)-C(3)  | 145.65(5)  |
| C(9)-Ru(1)-C(4)  | 97.30(5)   |
| C(8)-Ru(1)-C(4)  | 130.58(5)  |
| C(9A)-Ru(1)-C(4) | 136.5(11)  |
| O(1)-Ru(1)-C(4)  | 139.83(5)  |
| C(3)-Ru(1)-C(4)  | 37.54(4)   |
| C(9)-Ru(1)-C(2)  | 158.26(5)  |
| C(8)-Ru(1)-C(2)  | 97.74(5)   |
| C(9A)-Ru(1)-C(2) | 121.2(12)  |
| O(1)-Ru(1)-C(2)  | 107.52(5)  |
| C(3)-Ru(1)-C(2)  | 38.32(4)   |
| C(4)-Ru(1)-C(2)  | 62.92(4)   |
| C(9)-Ru(1)-C(5)  | 107.84(5)  |
| C(8)-Ru(1)-C(5)  | 159.77(5)  |
| C(9A)-Ru(1)-C(5) | 101.8(12)  |

|                    |            |
|--------------------|------------|
| O(1)-Ru(1)-C(5)    | 102.32(5)  |
| C(3)-Ru(1)-C(5)    | 63.15(4)   |
| C(4)-Ru(1)-C(5)    | 37.61(4)   |
| C(2)-Ru(1)-C(5)    | 62.74(4)   |
| C(9)-Ru(1)-C(1)    | 143.10(5)  |
| C(8)-Ru(1)-C(1)    | 128.38(5)  |
| C(9A)-Ru(1)-C(1)   | 95.6(13)   |
| O(1)-Ru(1)-C(1)    | 87.10(4)   |
| C(3)-Ru(1)-C(1)    | 62.33(4)   |
| C(4)-Ru(1)-C(1)    | 61.80(4)   |
| C(2)-Ru(1)-C(1)    | 36.80(4)   |
| C(5)-Ru(1)-C(1)    | 37.01(4)   |
| C(9)-Ru(1)-Cl(1A)  | 6.4(3)     |
| C(8)-Ru(1)-Cl(1A)  | 82.3(3)    |
| C(9A)-Ru(1)-Cl(1A) | 81.1(12)   |
| O(1)-Ru(1)-Cl(1A)  | 94.9(2)    |
| C(3)-Ru(1)-Cl(1A)  | 119.4(2)   |
| C(4)-Ru(1)-Cl(1A)  | 100.0(2)   |
| C(2)-Ru(1)-Cl(1A)  | 157.6(2)   |
| C(5)-Ru(1)-Cl(1A)  | 113.5(3)   |
| C(1)-Ru(1)-Cl(1A)  | 149.4(3)   |
| C(2)-C(1)-C(5)     | 108.92(10) |
| C(2)-C(1)-C(11)    | 125.99(10) |
| C(5)-C(1)-C(11)    | 124.95(10) |
| C(2)-C(1)-Ru(1)    | 69.63(6)   |
| C(5)-C(1)-Ru(1)    | 70.01(6)   |
| C(11)-C(1)-Ru(1)   | 129.88(8)  |
| C(12)-C(11)-C(16)  | 119.35(11) |
| C(12)-C(11)-C(1)   | 117.45(11) |
| C(16)-C(11)-C(1)   | 122.88(11) |
| C(13)-C(12)-C(11)  | 120.40(12) |
| C(13)-C(12)-H(12)  | 119.8      |
| C(11)-C(12)-H(12)  | 119.8      |
| C(14)-C(13)-C(12)  | 119.93(13) |
| C(14)-C(13)-H(13)  | 120.0      |
| C(12)-C(13)-H(13)  | 120.0      |
| C(13)-C(14)-C(15)  | 120.03(12) |
| C(13)-C(14)-H(14)  | 120.0      |
| C(15)-C(14)-H(14)  | 120.0      |

|                   |            |
|-------------------|------------|
| C(14)-C(15)-C(16) | 120.42(12) |
| C(14)-C(15)-H(15) | 119.8      |
| C(16)-C(15)-H(15) | 119.8      |
| C(15)-C(16)-C(11) | 119.88(12) |
| C(15)-C(16)-H(16) | 120.1      |
| C(11)-C(16)-H(16) | 120.1      |
| C(1)-C(2)-C(3)    | 107.63(10) |
| C(1)-C(2)-C(21)   | 125.73(10) |
| C(3)-C(2)-C(21)   | 126.64(10) |
| C(1)-C(2)-Ru(1)   | 73.57(6)   |
| C(3)-C(2)-Ru(1)   | 70.28(6)   |
| C(21)-C(2)-Ru(1)  | 121.64(8)  |
| C(22)-C(21)-C(26) | 118.79(11) |
| C(22)-C(21)-C(2)  | 121.26(10) |
| C(26)-C(21)-C(2)  | 119.95(10) |
| C(23)-C(22)-C(21) | 120.18(11) |
| C(23)-C(22)-H(22) | 119.9      |
| C(21)-C(22)-H(22) | 119.9      |
| C(24)-C(23)-C(22) | 120.52(11) |
| C(24)-C(23)-H(23) | 119.7      |
| C(22)-C(23)-H(23) | 119.7      |
| C(23)-C(24)-C(25) | 119.68(11) |
| C(23)-C(24)-H(24) | 120.2      |
| C(25)-C(24)-H(24) | 120.2      |
| C(26)-C(25)-C(24) | 120.08(11) |
| C(26)-C(25)-H(25) | 120.0      |
| C(24)-C(25)-H(25) | 120.0      |
| C(25)-C(26)-C(21) | 120.75(11) |
| C(25)-C(26)-H(26) | 119.6      |
| C(21)-C(26)-H(26) | 119.6      |
| C(4)-C(3)-C(2)    | 107.35(9)  |
| C(4)-C(3)-C(31)   | 125.67(10) |
| C(2)-C(3)-C(31)   | 125.69(10) |
| C(4)-C(3)-Ru(1)   | 71.79(6)   |
| C(2)-C(3)-Ru(1)   | 71.40(6)   |
| C(31)-C(3)-Ru(1)  | 132.30(8)  |
| C(36)-C(31)-C(32) | 118.56(11) |
| C(36)-C(31)-C(3)  | 123.13(11) |
| C(32)-C(31)-C(3)  | 118.10(11) |

|                   |            |
|-------------------|------------|
| C(33)-C(32)-C(31) | 120.80(12) |
| C(33)-C(32)-H(32) | 119.6      |
| C(31)-C(32)-H(32) | 119.6      |
| C(34)-C(33)-C(32) | 120.17(13) |
| C(34)-C(33)-H(33) | 119.9      |
| C(32)-C(33)-H(33) | 119.9      |
| C(33)-C(34)-C(35) | 119.63(12) |
| C(33)-C(34)-H(34) | 120.2      |
| C(35)-C(34)-H(34) | 120.2      |
| C(34)-C(35)-C(36) | 120.26(13) |
| C(34)-C(35)-H(35) | 119.9      |
| C(36)-C(35)-H(35) | 119.9      |
| C(31)-C(36)-C(35) | 120.56(12) |
| C(31)-C(36)-H(36) | 119.7      |
| C(35)-C(36)-H(36) | 119.7      |
| C(3)-C(4)-C(5)    | 108.72(10) |
| C(3)-C(4)-C(41)   | 127.75(10) |
| C(5)-C(4)-C(41)   | 122.87(10) |
| C(3)-C(4)-Ru(1)   | 70.67(6)   |
| C(5)-C(4)-Ru(1)   | 71.67(6)   |
| C(41)-C(4)-Ru(1)  | 130.88(8)  |
| C(46)-C(41)-C(42) | 119.20(11) |
| C(46)-C(41)-C(4)  | 123.78(11) |
| C(42)-C(41)-C(4)  | 117.00(10) |
| C(43)-C(42)-C(41) | 120.46(12) |
| C(43)-C(42)-H(42) | 119.8      |
| C(41)-C(42)-H(42) | 119.8      |
| C(44)-C(43)-C(42) | 120.01(12) |
| C(44)-C(43)-H(43) | 120.0      |
| C(42)-C(43)-H(43) | 120.0      |
| C(45)-C(44)-C(43) | 119.83(12) |
| C(45)-C(44)-H(44) | 120.1      |
| C(43)-C(44)-H(44) | 120.1      |
| C(44)-C(45)-C(46) | 120.43(12) |
| C(44)-C(45)-H(45) | 119.8      |
| C(46)-C(45)-H(45) | 119.8      |
| C(45)-C(46)-C(41) | 120.06(12) |
| C(45)-C(46)-H(46) | 120.0      |
| C(41)-C(46)-H(46) | 120.0      |



|                   |            |
|-------------------|------------|
| C(1)-C(5)-C(4)    | 107.24(10) |
| C(1)-C(5)-C(51)   | 126.91(10) |
| C(4)-C(5)-C(51)   | 125.50(10) |
| C(1)-C(5)-Ru(1)   | 72.98(6)   |
| C(4)-C(5)-Ru(1)   | 70.72(6)   |
| C(51)-C(5)-Ru(1)  | 126.90(8)  |
| C(52)-C(51)-C(56) | 118.79(11) |
| C(52)-C(51)-C(5)  | 121.30(10) |
| C(56)-C(51)-C(5)  | 119.90(10) |
| C(53)-C(52)-C(51) | 120.86(12) |
| C(53)-C(52)-H(52) | 119.6      |
| C(51)-C(52)-H(52) | 119.6      |
| C(54)-C(53)-C(52) | 119.89(12) |
| C(54)-C(53)-H(53) | 120.1      |
| C(52)-C(53)-H(53) | 120.1      |
| C(53)-C(54)-C(55) | 119.83(12) |
| C(53)-C(54)-H(54) | 120.1      |
| C(55)-C(54)-H(54) | 120.1      |
| C(54)-C(55)-C(56) | 120.31(12) |
| C(54)-C(55)-H(55) | 119.8      |
| C(56)-C(55)-H(55) | 119.8      |
| C(55)-C(56)-C(51) | 120.30(11) |
| C(55)-C(56)-H(56) | 119.8      |
| C(51)-C(56)-H(56) | 119.8      |
| O(3)-C(8)-Ru(1)   | 177.64(11) |
| C(6)-O(1)-Ru(1)   | 121.65(10) |
| O(2)-C(6)-O(1)    | 125.23(14) |
| O(2)-C(6)-C(7)    | 121.31(13) |
| O(1)-C(6)-C(7)    | 113.45(14) |
| O(4A)-C(9A)-Ru(1) | 175(3)     |
| O(4)-C(9)-Ru(1)   | 174.81(14) |

---

Symmetry transformations used to generate equivalent atoms:

Table 4. Anisotropic displacement parameters ( $\text{\AA}^2 \times 10^3$ ) for X11159. The anisotropic displacement factor exponent takes the form:  $-2p^2[ h^2 a^{*2}U^{11} + \dots + 2 h k a^* b^* U^{12} ]$

| $U^{11}U^{22}$ | $U^{33}$ | $U^{23}$ | $U^{13}$ | $U^{12}$ |       |      |
|----------------|----------|----------|----------|----------|-------|------|
| Ru(1)          | 13(1)    | 12(1)    | 10(1)    | 1(1)     | 4(1)  | 1(1) |
| C(1)13(1)      | 14(1)    | 12(1)    | 0(1)     | 4(1)     | 1(1)  |      |
| C(11)13(1)     | 12(1)    | 18(1)    | 0(1)     | 5(1)     | 1(1)  |      |
| C(12)18(1)     | 18(1)    | 21(1)    | 2(1)     | 8(1)     | 1(1)  |      |
| C(13)22(1)     | 20(1)    | 32(1)    | 1(1)     | 16(1)    | 1(1)  |      |
| C(14)16(1)     | 17(1)    | 43(1)    | -3(1)    | 13(1)    | 0(1)  |      |
| C(15)13(1)     | 16(1)    | 34(1)    | -4(1)    | 2(1)     | 2(1)  |      |
| C(16)16(1)     | 15(1)    | 21(1)    | -1(1)    | 2(1)     | 2(1)  |      |
| C(2)13(1)      | 13(1)    | 10(1)    | 1(1)     | 3(1)     | 0(1)  |      |
| C(21)13(1)     | 12(1)    | 13(1)    | 1(1)     | 4(1)     | 1(1)  |      |
| C(22)17(1)     | 14(1)    | 15(1)    | 0(1)     | 2(1)     | -1(1) |      |
| C(23)21(1)     | 17(1)    | 16(1)    | 4(1)     | 2(1)     | 1(1)  |      |
| C(24)23(1)     | 14(1)    | 21(1)    | 3(1)     | 7(1)     | 0(1)  |      |
| C(25)20(1)     | 15(1)    | 21(1)    | -1(1)    | 4(1)     | -4(1) |      |
| C(26)16(1)     | 17(1)    | 15(1)    | 1(1)     | 2(1)     | -1(1) |      |
| C(3)13(1)      | 13(1)    | 12(1)    | 0(1)     | 3(1)     | 0(1)  |      |
| C(31)12(1)     | 17(1)    | 13(1)    | 2(1)     | 4(1)     | 1(1)  |      |
| C(32)16(1)     | 20(1)    | 18(1)    | 0(1)     | 4(1)     | -1(1) |      |
| C(33)17(1)     | 30(1)    | 20(1)    | 0(1)     | 0(1)     | -4(1) |      |
| C(34)14(1)     | 36(1)    | 23(1)    | 7(1)     | 2(1)     | 3(1)  |      |
| C(35)19(1)     | 27(1)    | 27(1)    | 4(1)     | 4(1)     | 8(1)  |      |
| C(36)18(1)     | 20(1)    | 22(1)    | -1(1)    | 2(1)     | 3(1)  |      |
| C(4)14(1)      | 13(1)    | 11(1)    | 0(1)     | 4(1)     | 0(1)  |      |
| C(41)14(1)     | 14(1)    | 14(1)    | 3(1)     | 2(1)     | -1(1) |      |
| C(42)20(1)     | 16(1)    | 19(1)    | 0(1)     | 4(1)     | -1(1) |      |
| C(43)22(1)     | 15(1)    | 26(1)    | 1(1)     | 1(1)     | -2(1) |      |
| C(44)18(1)     | 19(1)    | 27(1)    | 8(1)     | -1(1)    | -4(1) |      |
| C(45)14(1)     | 25(1)    | 21(1)    | 7(1)     | 2(1)     | -2(1) |      |
| C(46)14(1)     | 19(1)    | 17(1)    | 2(1)     | 3(1)     | 0(1)  |      |
| C(5)14(1)      | 12(1)    | 12(1)    | 0(1)     | 4(1)     | 1(1)  |      |
| C(51)14(1)     | 12(1)    | 14(1)    | 0(1)     | 2(1)     | 1(1)  |      |
| C(52)20(1)     | 19(1)    | 17(1)    | 3(1)     | 6(1)     | 4(1)  |      |
| C(53)26(1)     | 20(1)    | 20(1)    | 7(1)     | 6(1)     | 5(1)  |      |
| C(54)24(1)     | 17(1)    | 24(1)    | 4(1)     | 2(1)     | 7(1)  |      |

|            |       |        |        |       |        |        |
|------------|-------|--------|--------|-------|--------|--------|
| C(55)19(1) | 17(1) | 22(1)  | -1(1)  | 4(1)  | 5(1)   |        |
| C(56)18(1) | 14(1) | 16(1)  | -1(1)  | 4(1)  | 1(1)   |        |
| C(8)23(1)  | 20(1) | 12(1)  | 0(1)   | 4(1)  | 2(1)   |        |
| O(3)39(1)  | 22(1) | 24(1)  | -3(1)  | 4(1)  | 12(1)  |        |
| O(1)16(1)  | 33(1) | 18(1)  | -8(1)  | 4(1)  | -4(1)  |        |
| C(6)19(1)  | 21(1) | 16(1)  | -4(1)  | 0(1)  | 0(1)   |        |
| O(2)24(1)  | 28(1) | 17(1)  | -6(1)  | 6(1)  | -1(1)  |        |
| C(7)25(1)  | 66(1) | 27(1)  | -18(1) | 2(1)  | -15(1) |        |
| C(9A)      | 22(7) | 14(11) | 28(12) | 1(9)  | 2(5)   | -6(8)  |
| O(4A)      | 16(9) | 62(14) | 41(11) | 4(11) | -4(6)  | -6(10) |
| C(9)23(1)  | 14(1) | 16(1)  | -2(1)  | 4(1)  | 0(1)   |        |
| O(4)39(1)  | 26(1) | 20(1)  | 0(1)   | 14(1) | -7(1)  |        |
| Cl(1A)     | 42(5) | 25(5)  | 17(4)  | 3(3)  | 20(3)  | -7(3)  |

Table 5. Hydrogen coordinates ( $\times 10^4$ ) and isotropic displacement parameters ( $\text{\AA}^2 \times 10^{-3}$ ) for X11159.

| x     | y    | z     | U(eq) |    |
|-------|------|-------|-------|----|
| H(12) | 1579 | 6347  | 6618  | 22 |
| H(13) | 426  | 6147  | 6797  | 28 |
| H(14) | -547 | 6359  | 5512  | 29 |
| H(15) | -370 | 6787  | 4053  | 27 |
| H(16) | 780  | 7015  | 3868  | 21 |
| H(22) | 3378 | 5266  | 7206  | 19 |
| H(23) | 3345 | 3257  | 7848  | 22 |
| H(24) | 2580 | 1709  | 7037  | 23 |
| H(25) | 1835 | 2175  | 5574  | 23 |
| H(26) | 1864 | 4174  | 4926  | 19 |
| H(32) | 4185 | 8218  | 6691  | 22 |
| H(33) | 5316 | 7720  | 7600  | 28 |
| H(34) | 5833 | 5775  | 7419  | 29 |
| H(35) | 5227 | 4352  | 6294  | 30 |
| H(36) | 4086 | 4832  | 5397  | 24 |
| H(42) | 3039 | 10295 | 5695  | 22 |
| H(43) | 3671 | 12113 | 5511  | 26 |
| H(44) | 4458 | 12066 | 4563  | 27 |
| H(45) | 4633 | 10188 | 3829  | 25 |

|       |      |       |      |    |
|-------|------|-------|------|----|
| H(46) | 4023 | 8351  | 4036 | 20 |
| H(52) | 2251 | 9406  | 3267 | 22 |
| H(53) | 1541 | 11105 | 2590 | 27 |
| H(54) | 658  | 11863 | 3256 | 27 |
| H(55) | 516  | 10964 | 4630 | 24 |
| H(56) | 1239 | 9287  | 5324 | 19 |
| H(7A) | 616  | 5068  | 1484 | 60 |
| H(7B) | 538  | 4808  | 2510 | 60 |
| H(7C) | 897  | 3768  | 1996 | 60 |

## V. Mechanistic/Reactivity Studies

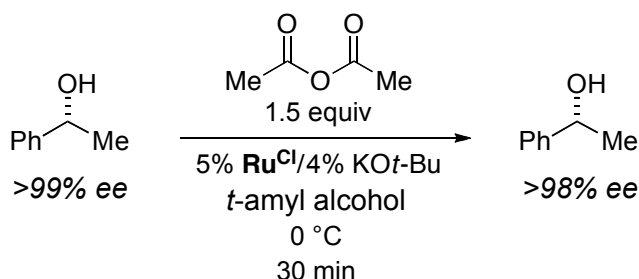

**Eq 5.** In a nitrogen-filled glovebox, a solution of Ru<sup>Cl</sup> (6.4 mg, 0.010 mmol) and KO<sup>t</sup>-Bu (0.90 mg, 0.0080 mmol) in *t*-amyl alcohol (400 μL) in an oven-dried 5-mL vial equipped with a stir bar was stirred at room temperature for 6 min. The vial was then capped with a septum-lined cap, removed from the glovebox, and cooled to 0 °C. Next, Ac<sub>2</sub>O (28 μL, 0.30 mmol) was added dropwise to the reaction vial over 1 min. Then, (*R*)-1-phenylethanol (24 μL, 0.20 mmol) was added, and the reaction mixture was stirred at 0 °C. After 30 min, an aliquot (40 μL) of the reaction mixture was removed and diluted with Et<sub>2</sub>O (1.0 mL). The ee of 1-phenylethanol was determined by chiral GC analysis.

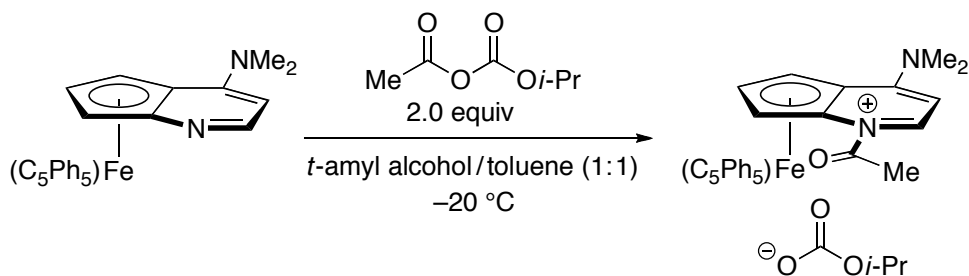

**Eq 11.** In a nitrogen-filled glovebox, C<sub>5</sub>Ph<sub>5</sub>-DMAP\* (20 mg, 0.030 mmol), toluene-*d*<sub>8</sub> (0.25 mL), and *t*-amyl alcohol (0.25 mL) were combined in a dry NMR tube. The NMR tube was then capped with a screw-cap and removed from the glovebox. The NMR tube was cooled to -20 °C, and then acetyl isopropyl carbonate (8.6 μL, 0.60 mmol) was added to the NMR tube via syringe. The reaction was monitored by <sup>1</sup>H NMR as a function of time. After 1.5 h at -20 °C, the acylpyridinium salt had

formed almost quantitatively. The  $^1\text{H}$  and  $^{13}\text{C}$  NMR spectra of the acylpyridinium salt are included in Section VI.

**Determination of the rate law: DKR of 1-phenylethanol.** In a nitrogen-filled glovebox,  $\text{Ru}^{\text{Cl}}$ ,  $\text{KO}t\text{-Bu}$ , tetradecane, toluene (250  $\mu\text{L}$ ), and  $t$ -amyl alcohol (250  $\mu\text{L}$ ) were combined in an oven-dried 4-mL vial equipped with a stir bar. The mixture was stirred at room temperature for 6 min, and then 1-phenylethanol and  $(\text{C}_5\text{Ph}_5)\text{-DMAP}^*$  were added to the vial. The vial was then capped with a septum-lined cap, removed from the glovebox, and cooled to 10  $^\circ\text{C}$ . After cooling the solution for 10 min, acetyl isopropyl carbonate was added dropwise to the vial via syringe over 1 min. An aliquot (40  $\mu\text{L}$ ) of the reaction mixture was removed after 10 min, 30 min, 50 min, 80 min, and 120 min, and then filtered through a short pad of silica. The amount of the product was determined by GC analysis (calibrated with tetradecane as the internal standard).

### Order in 1-phenylethanol:

*Table S1.* Observed Initial Rates

| $[\text{1-phenylethanol}]_{\text{initial}}$<br>(M) <sup>a</sup> | $k_{\text{obs}}$<br>(M/h) |
|-----------------------------------------------------------------|---------------------------|
| 0.00                                                            | 0.00                      |
| 0.21                                                            | 0.0092                    |
| 0.40                                                            | 0.016                     |
| 0.51                                                            | 0.019                     |
| 0.60                                                            | 0.022                     |
| 0.72                                                            | 0.024                     |

<sup>a</sup> Reaction conditions:  $[\text{acetyl isopropyl carbonate}]_{\text{initial}} = 0.75 \text{ M}$ ,  $[(\text{C}_5\text{Ph}_5)\text{-DMAP}^*]_{\text{initial}} = 5.0 \text{ mM}$ ,  $[\text{Ru}^{\text{Cl}}]_{\text{initial}} = 0.026 \text{ M}$ , and  $[\text{KO}t\text{-Bu}]_{\text{initial}} = 0.022 \text{ M}$ .

*Figure S1.*

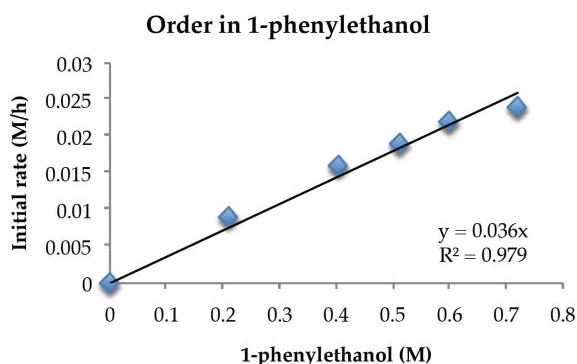

### Order in acetyl isopropyl carbonate:

*Table S2.* Observed Initial Rates

| [acetyl isopropyl carbonate] <sub>initial</sub><br>(M) <sup>a</sup> | k <sub>obs</sub><br>(M/h) |
|---------------------------------------------------------------------|---------------------------|
| 0.00                                                                | 0.00                      |
| 0.12                                                                | 0.0071                    |
| 0.25                                                                | 0.013                     |
| 0.50                                                                | 0.017                     |
| 0.75                                                                | 0.019                     |
| 1.00                                                                | 0.021                     |

<sup>a</sup> Reaction conditions: [1-phenylethanol]<sub>initial</sub> = 0.50 M, [(C<sub>5</sub>Ph<sub>5</sub>)-DMAP\*]<sub>initial</sub> = 5.0 mM, [Ru<sup>Cl</sup>]<sub>initial</sub> = 0.026 M, and [KO*t*-Bu]<sub>initial</sub> = 0.022 M.

*Figure S2.*

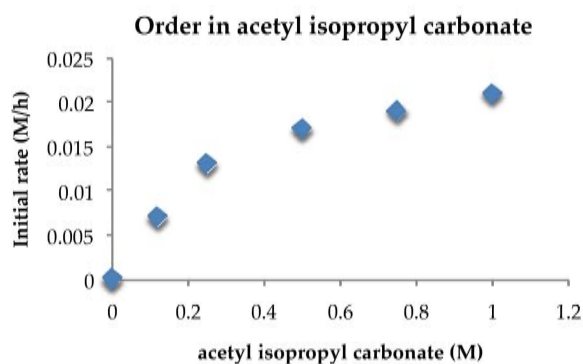

### Order in (C<sub>5</sub>Ph<sub>5</sub>)-DMAP\*:

*Table S3.* Observed Initial Rates

| [(C <sub>5</sub> Ph <sub>5</sub> )-DMAP*] <sub>initial</sub><br>(mM) <sup>a</sup> | k <sub>obs</sub><br>(M/h) |
|-----------------------------------------------------------------------------------|---------------------------|
| 0.0                                                                               | 0.00                      |
| 1.0                                                                               | 0.0034                    |
| 3.0                                                                               | 0.010                     |
| 5.0                                                                               | 0.017                     |
| 7.0                                                                               | 0.022                     |

<sup>a</sup> Reaction conditions: [1-phenylethanol]<sub>initial</sub> = 0.50 M, [acetyl isopropyl carbonate]<sub>initial</sub> = 0.75 M, [Ru<sup>Cl</sup>]<sub>initial</sub> = 0.026 M, and [KO*t*-Bu]<sub>initial</sub> = 0.022 M.

*Figure S3.*

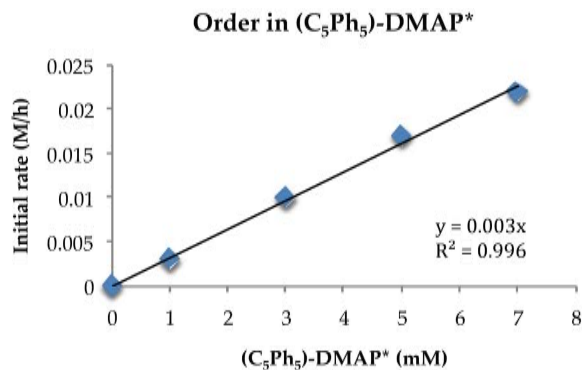

### Order in Ru<sup>O-*t*Bu</sup>

**Table S4.** Observed Initial Rates

| [Ru <sup>O-<i>t</i>Bu</sup> ] <sub>initial</sub><br>(M) <sup>a</sup> | k <sub>obs</sub><br>(M/h) |
|----------------------------------------------------------------------|---------------------------|
| 0.030                                                                | 0.017                     |
| 0.044                                                                | 0.017                     |
| 0.066                                                                | 0.016                     |

<sup>a</sup> Reaction conditions: [1-phenylethanol]<sub>initial</sub> = 0.50 M, [acetyl isopropyl carbonate]<sub>initial</sub> = 0.75 M, and [(C<sub>5</sub>Ph<sub>5</sub>)-DMAP\*]<sub>initial</sub> = 5.0 mM.

**Figure S4.**

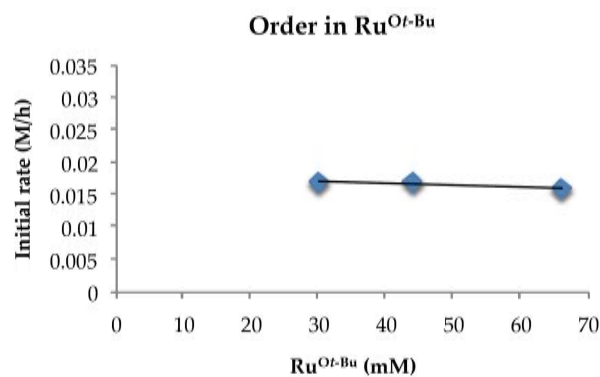

# VI. $^1\text{H}$ NMR Spectra and GC/HPLC traces

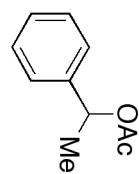

Table 1, entry 1

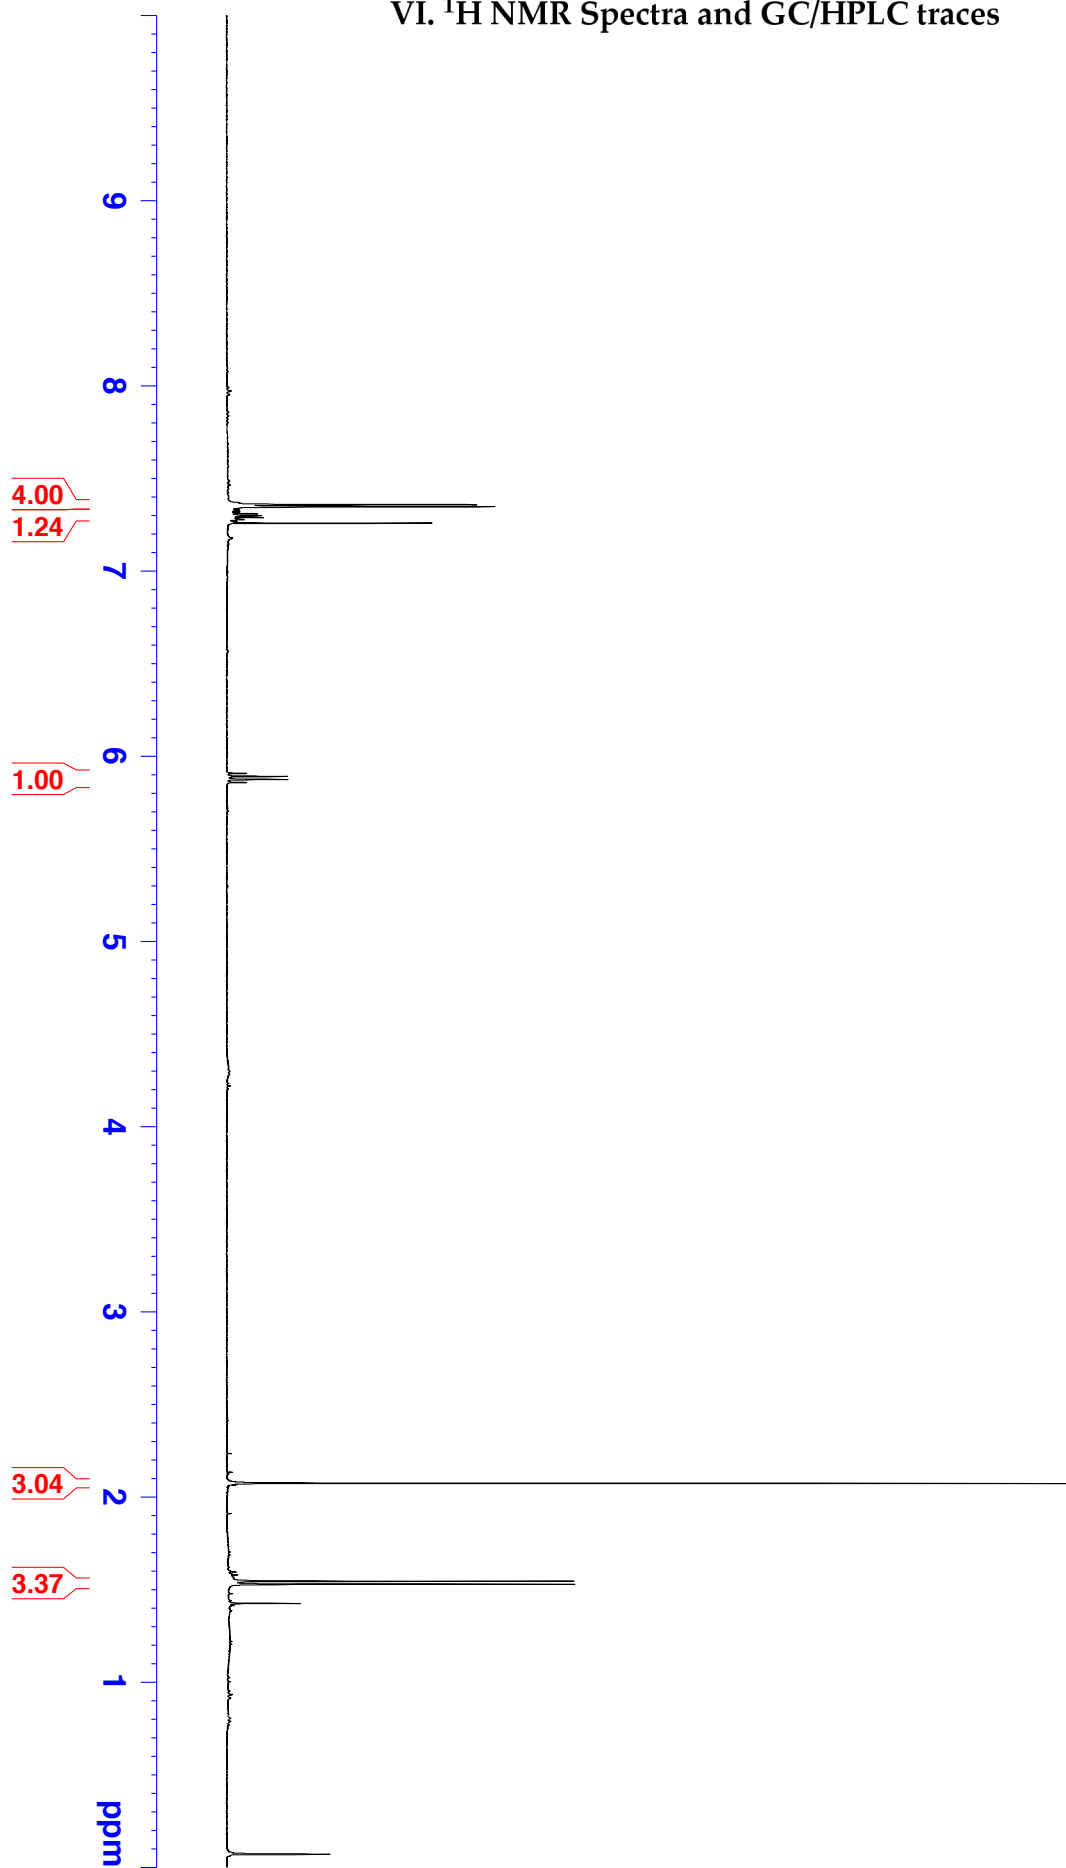



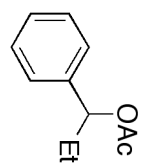

Table 1, entry 2

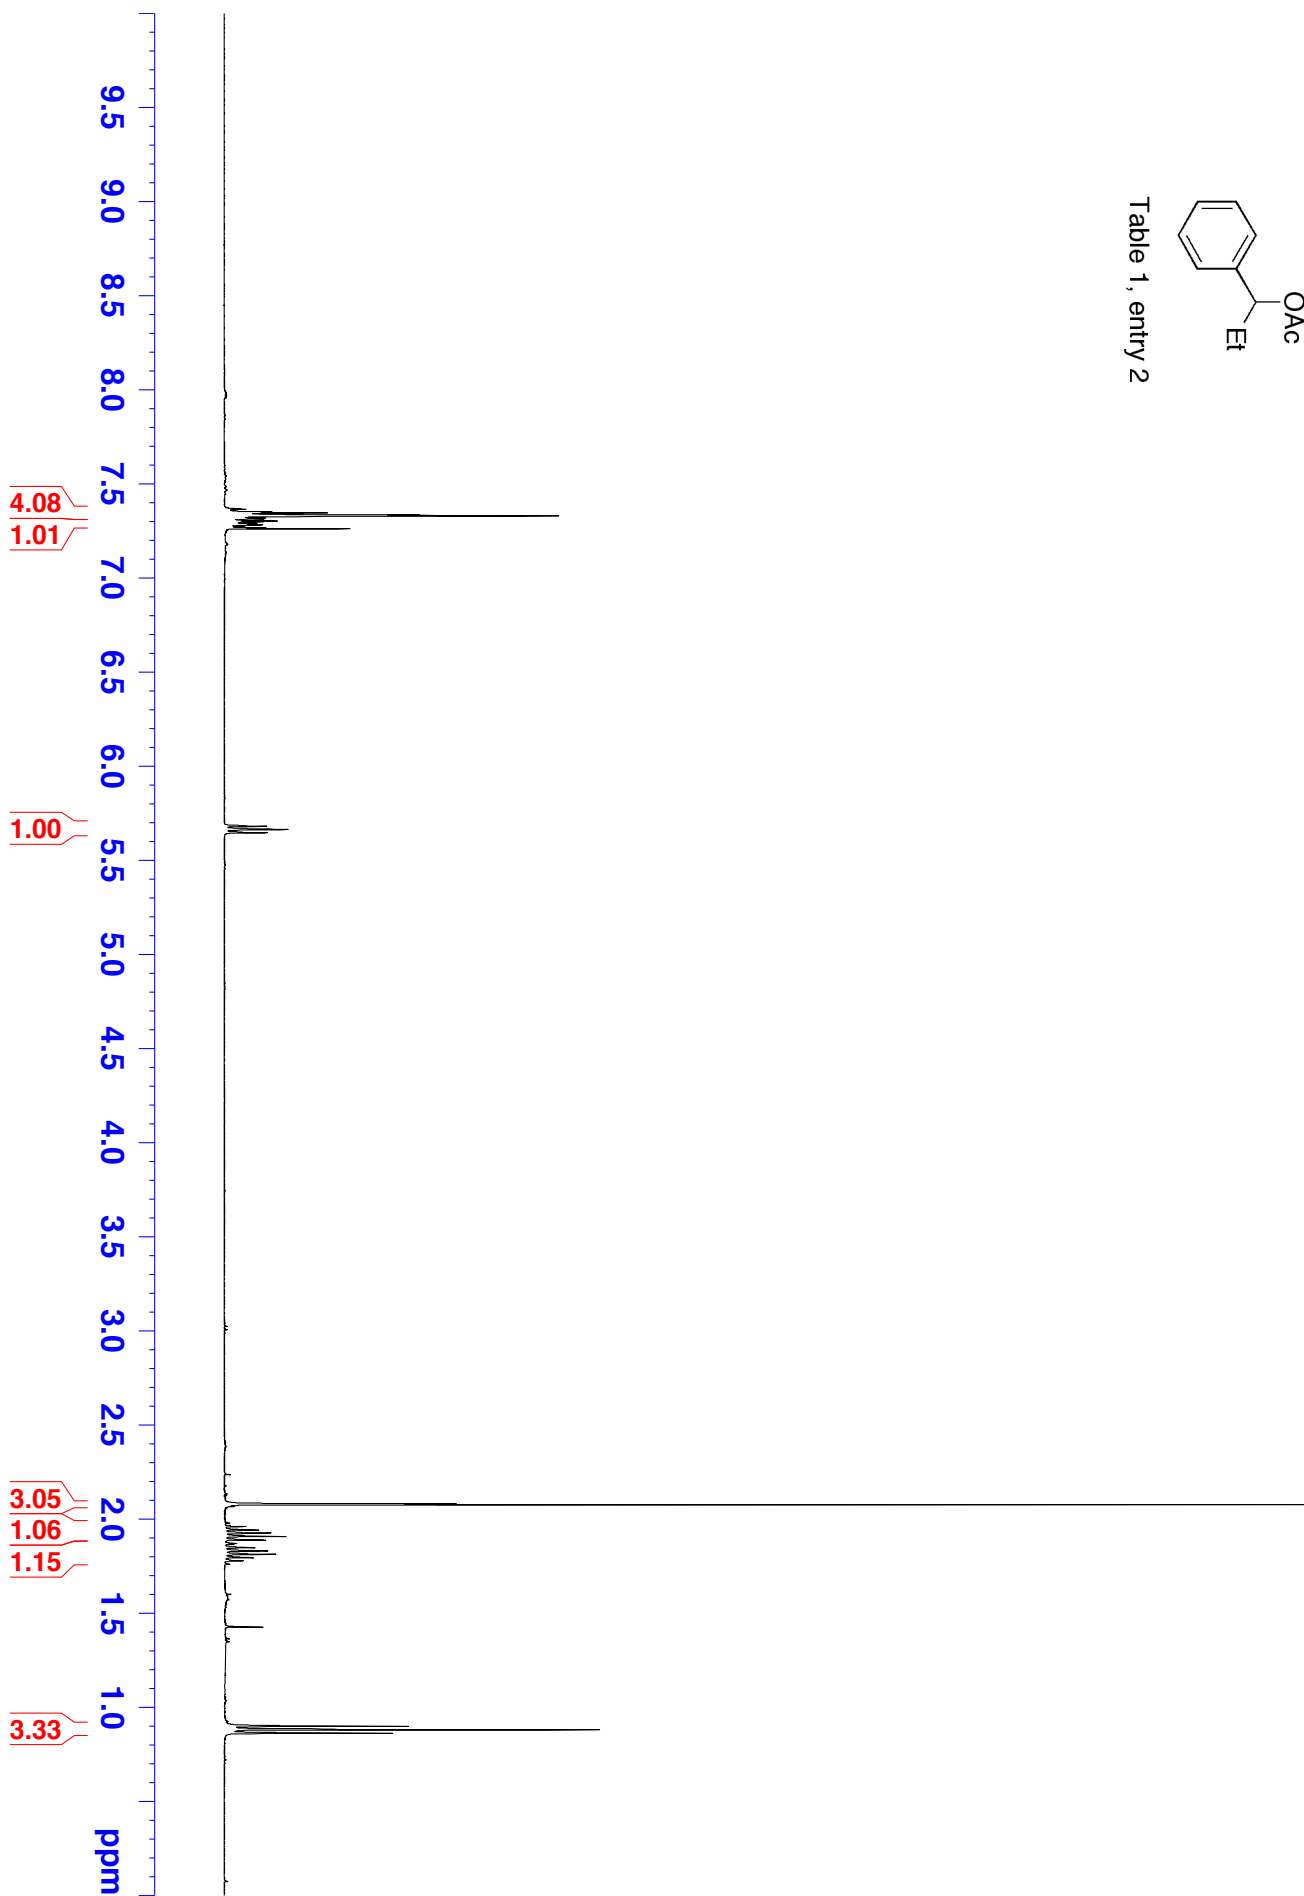

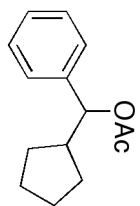

Table 1, entry 3

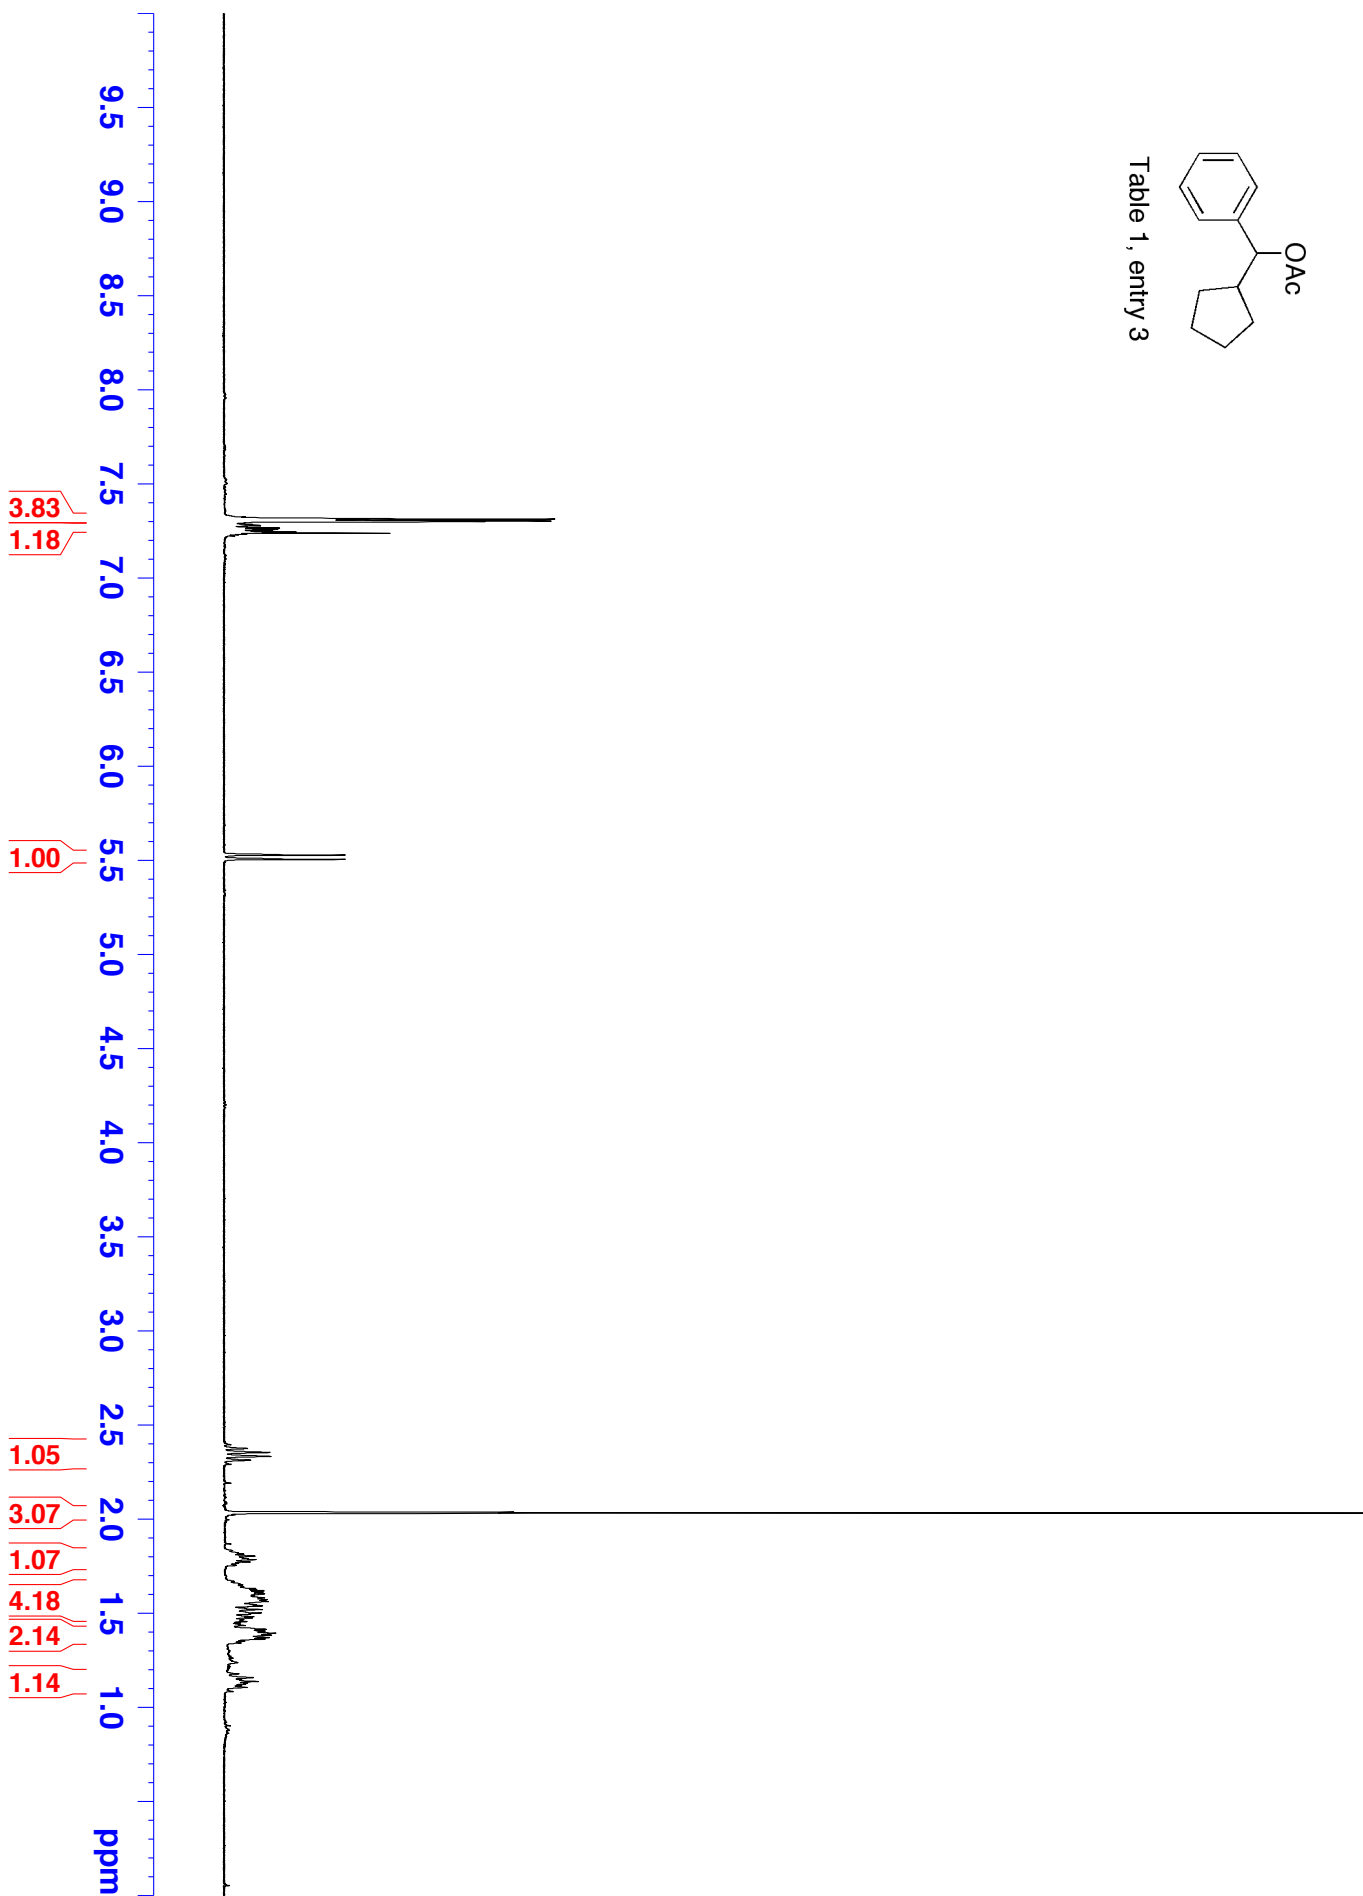

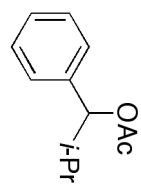

Table 1, entry 4

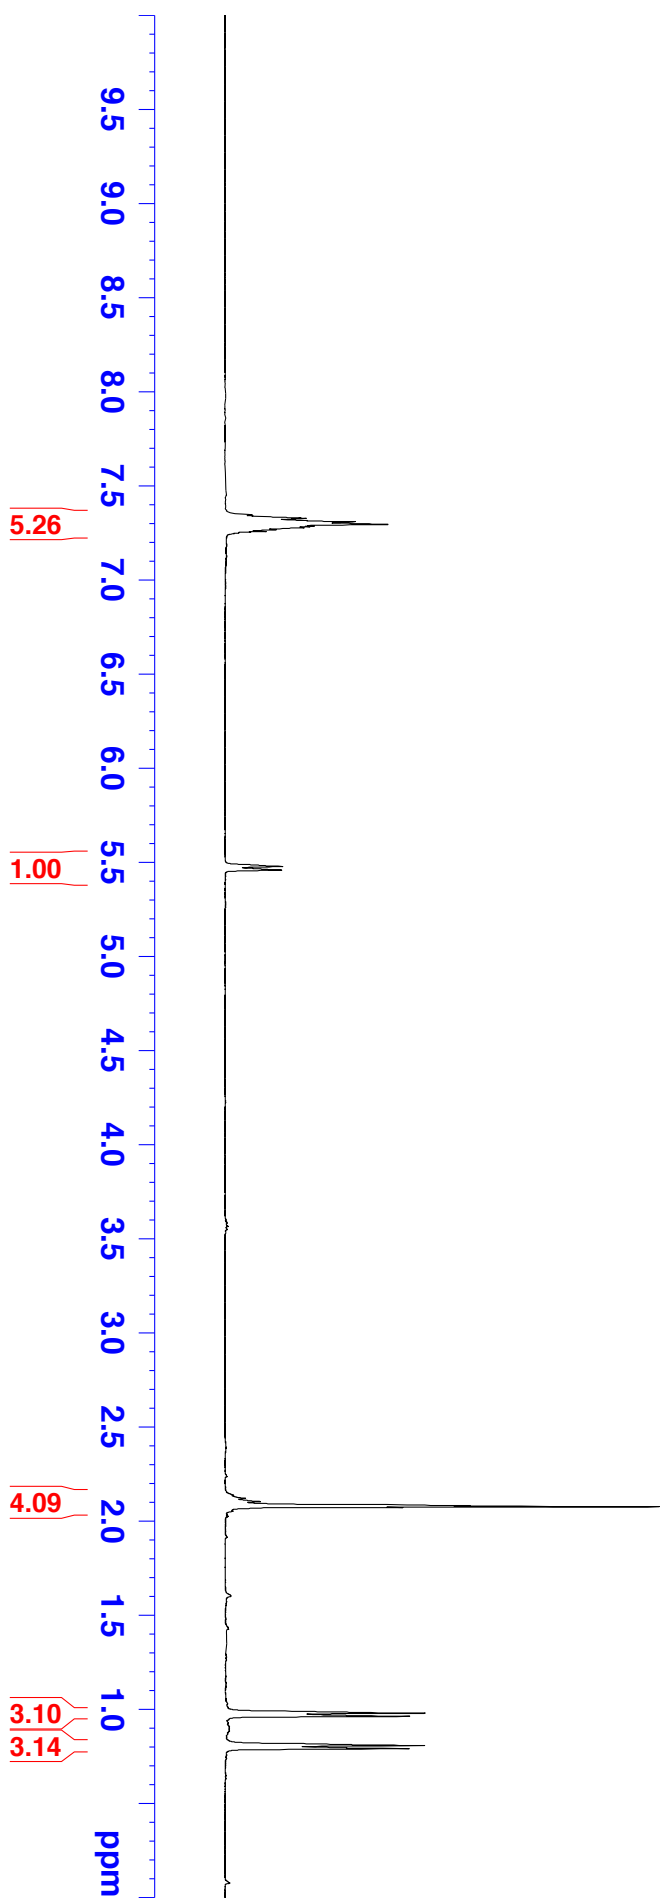

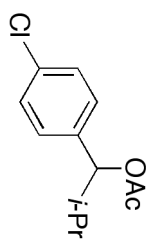

Table 1, entry 5

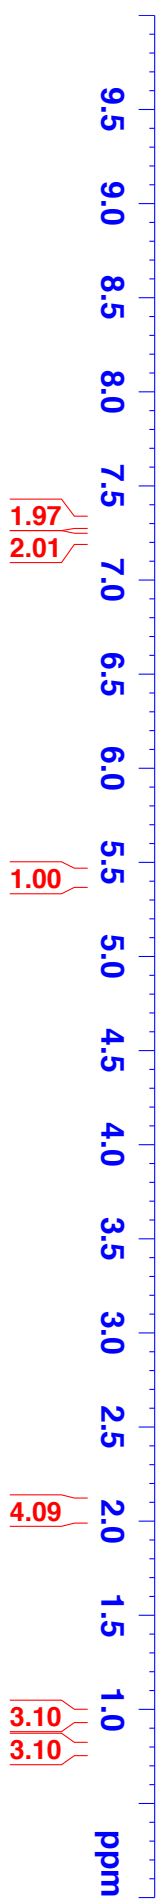

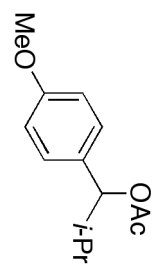

Table 1, entry 6

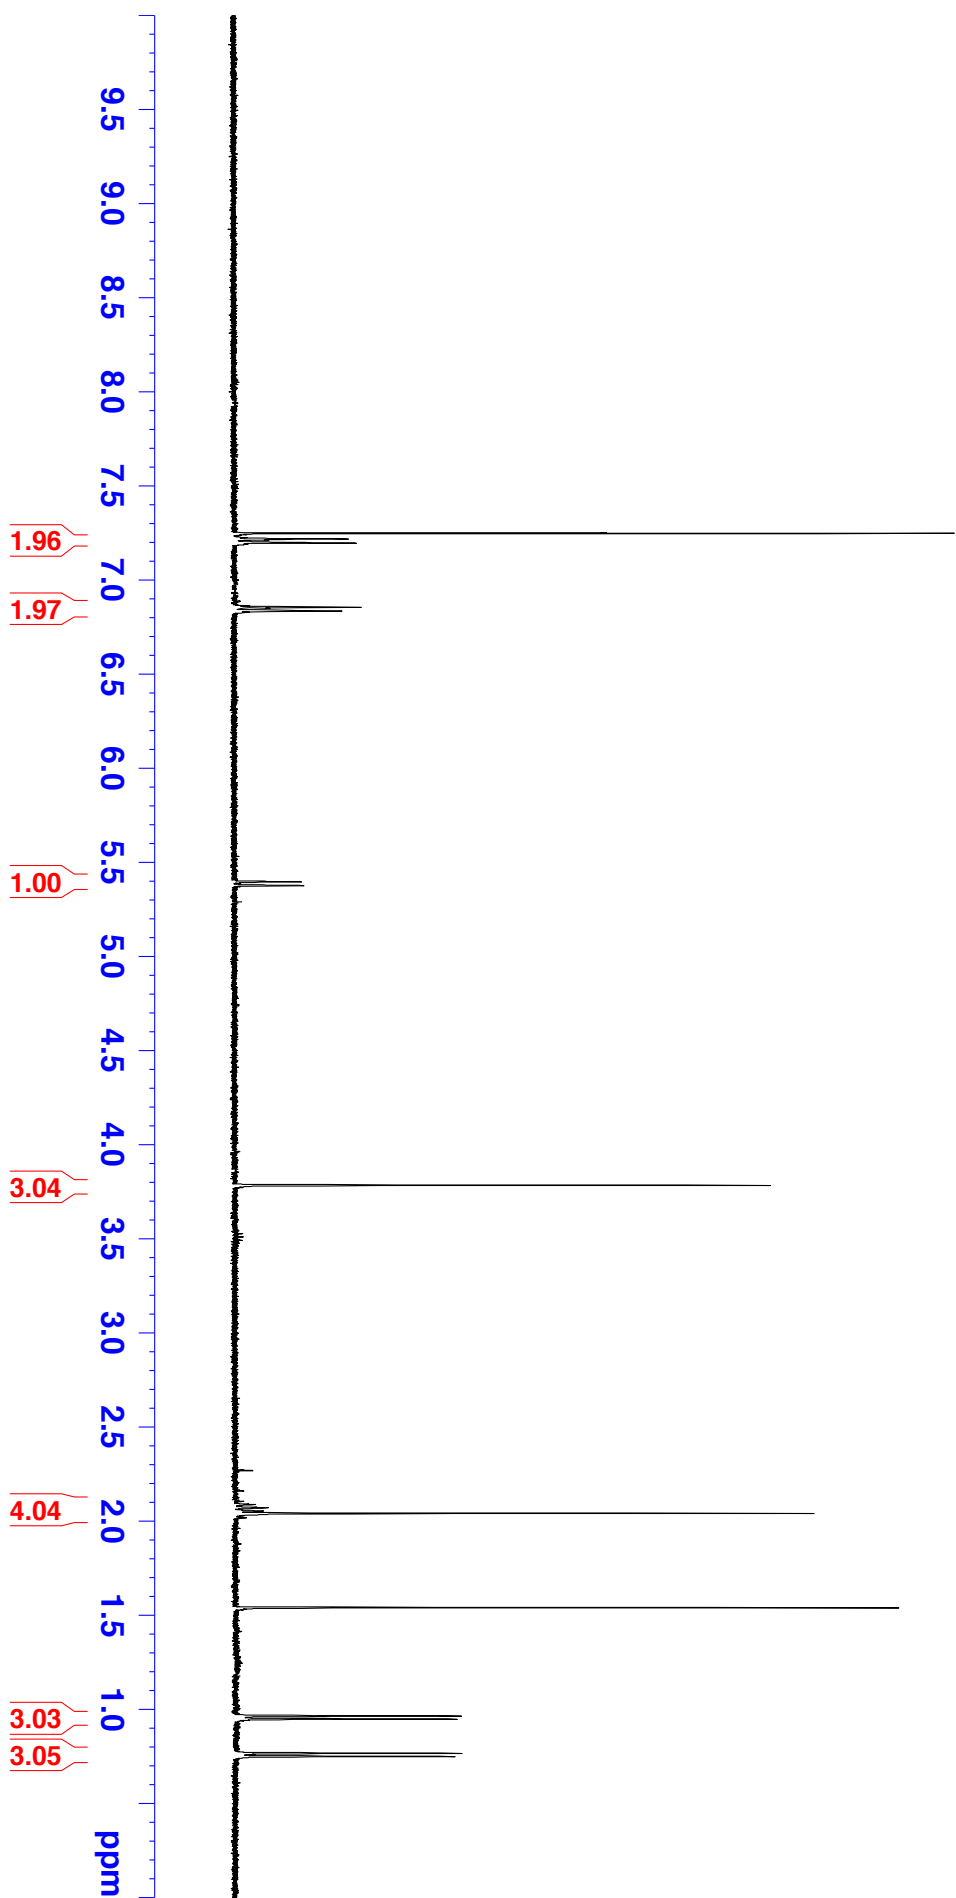

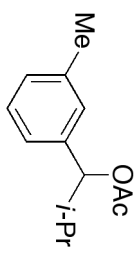

Table 1, entry 7

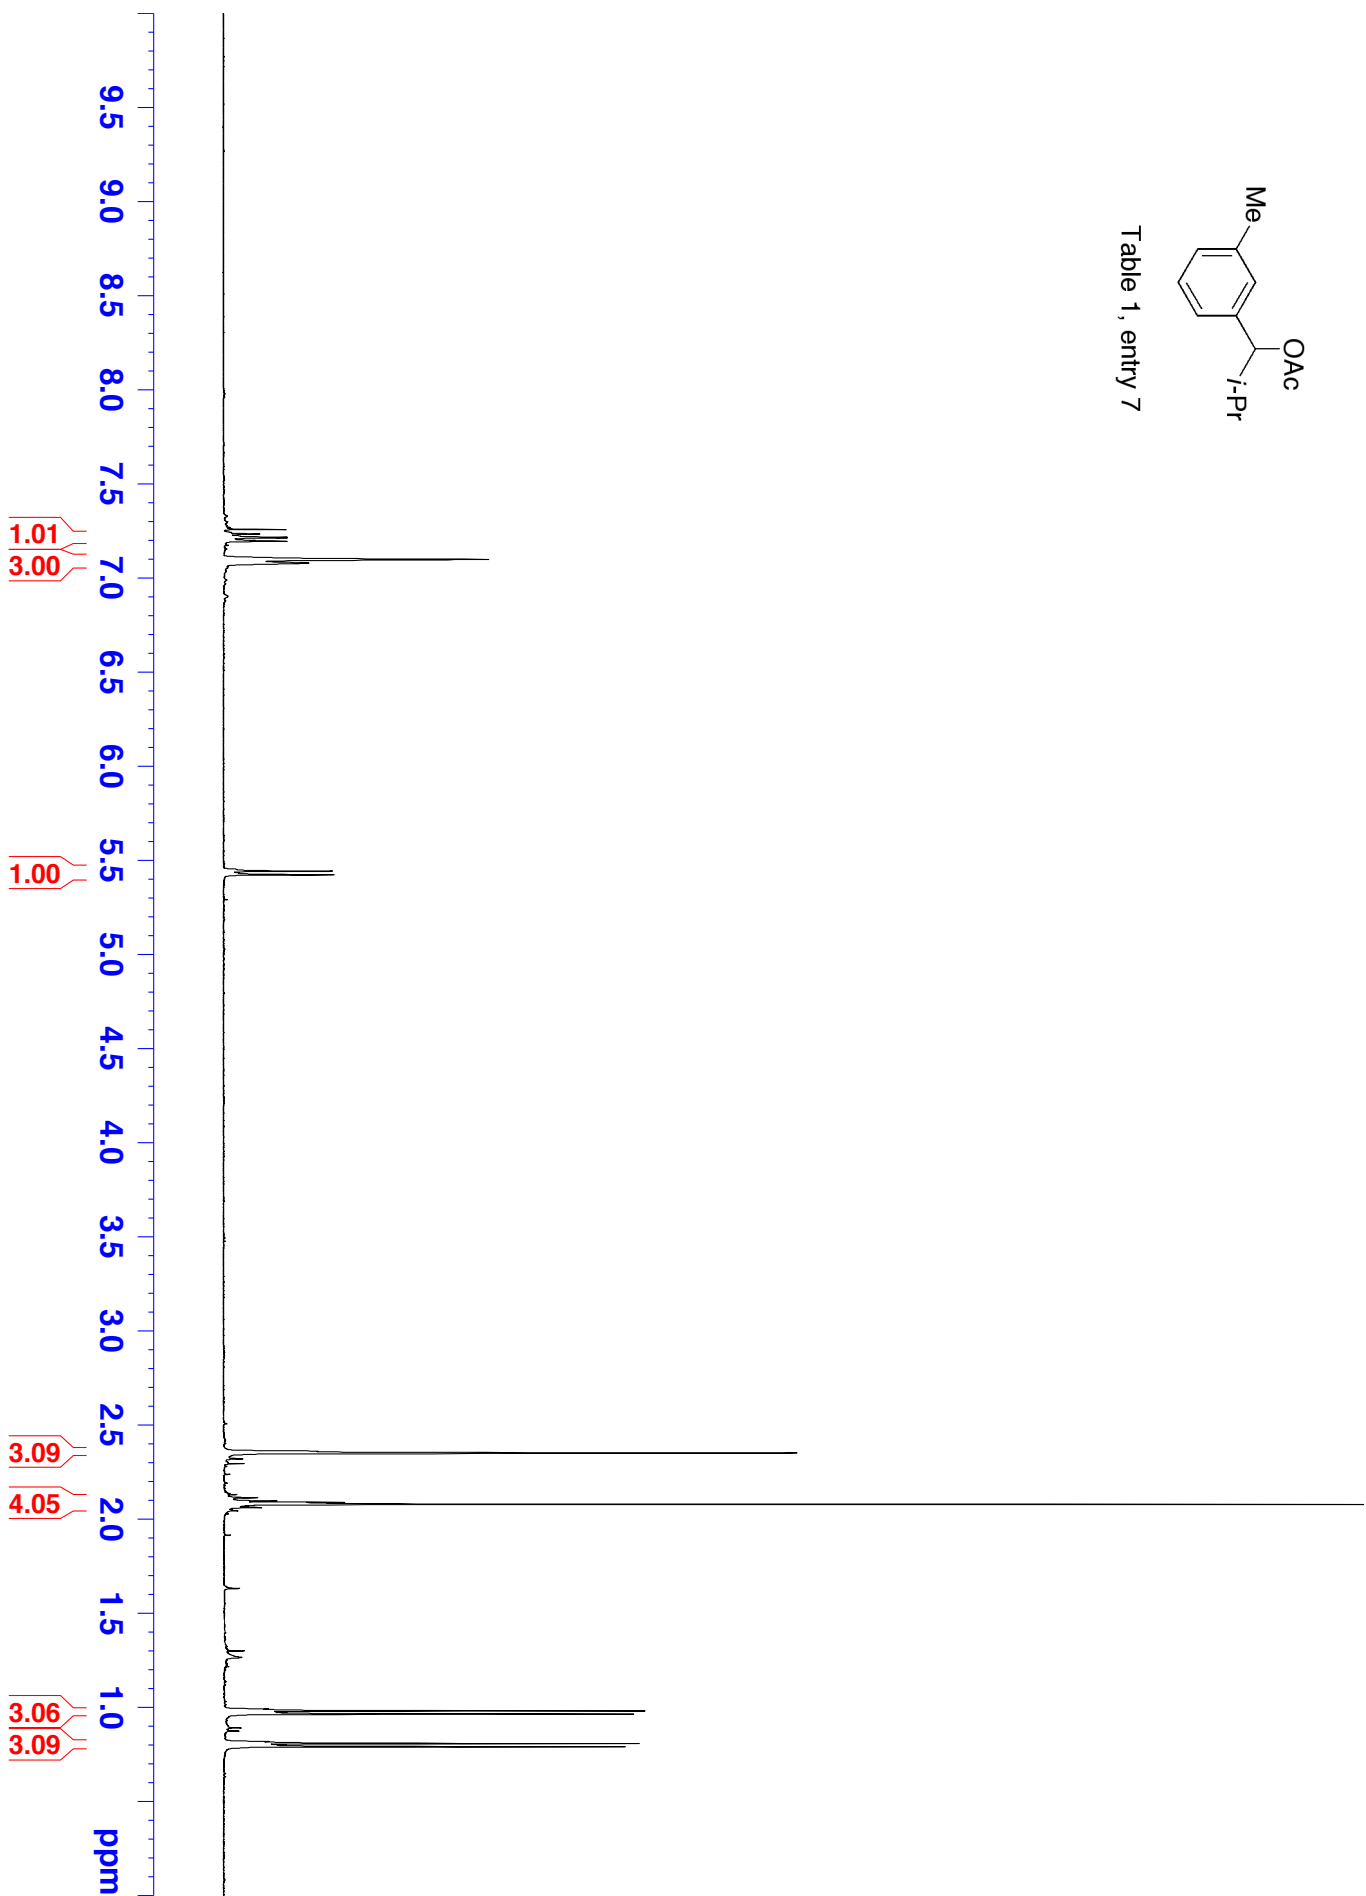

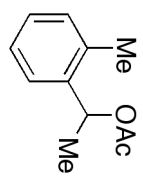

Table 1, entry 8

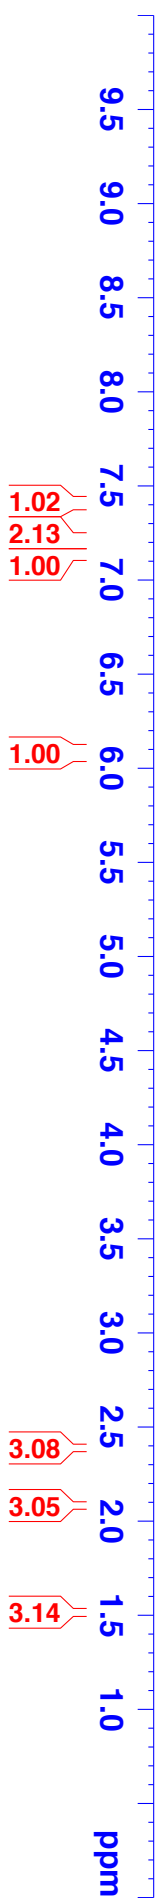

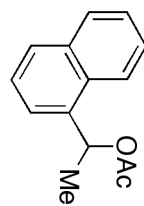

Table 1, entry 9

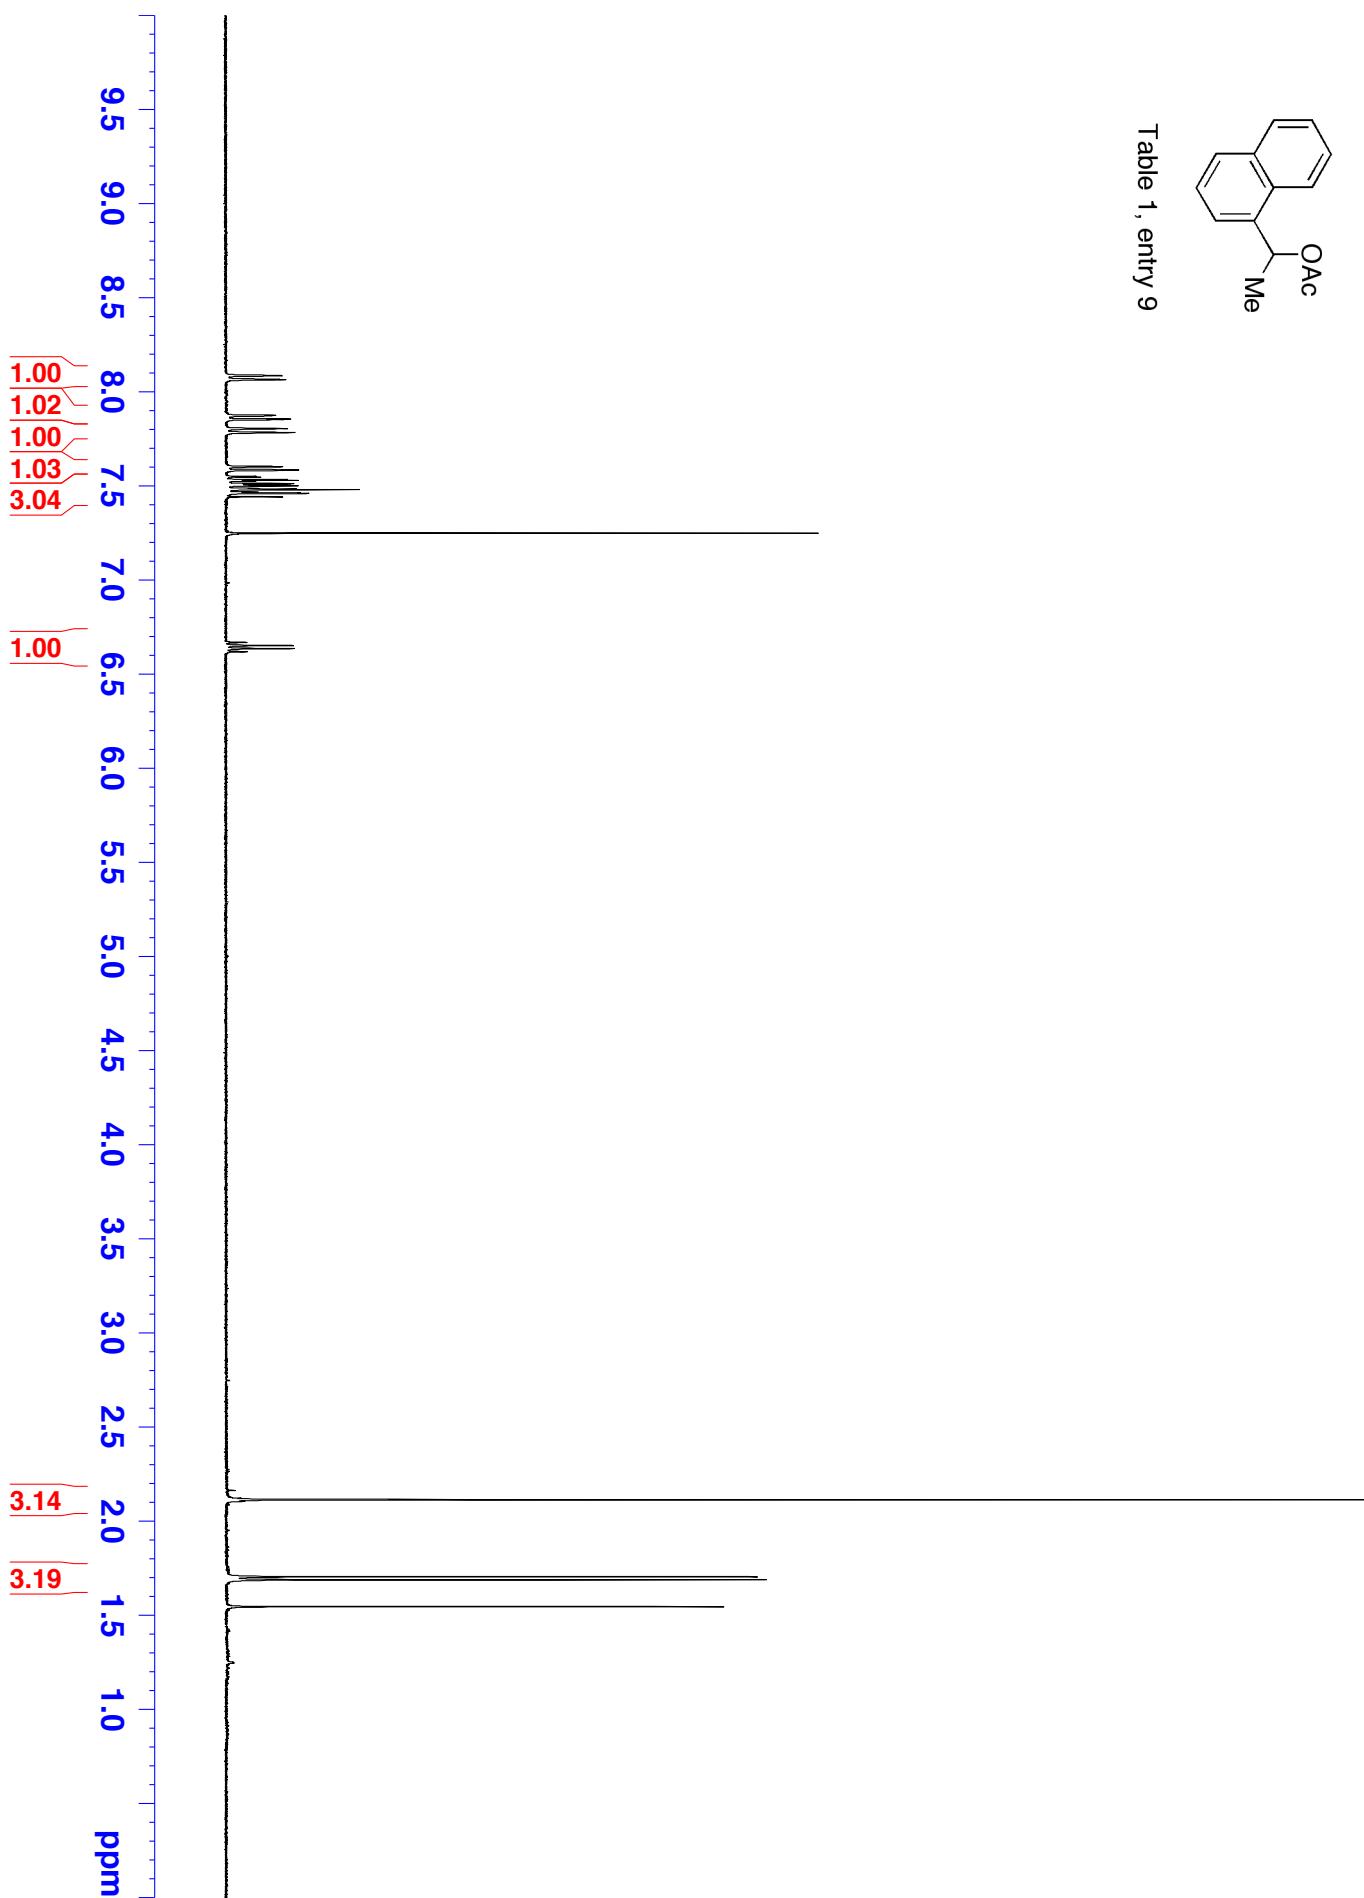



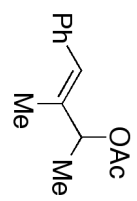

Table 1, entry 10

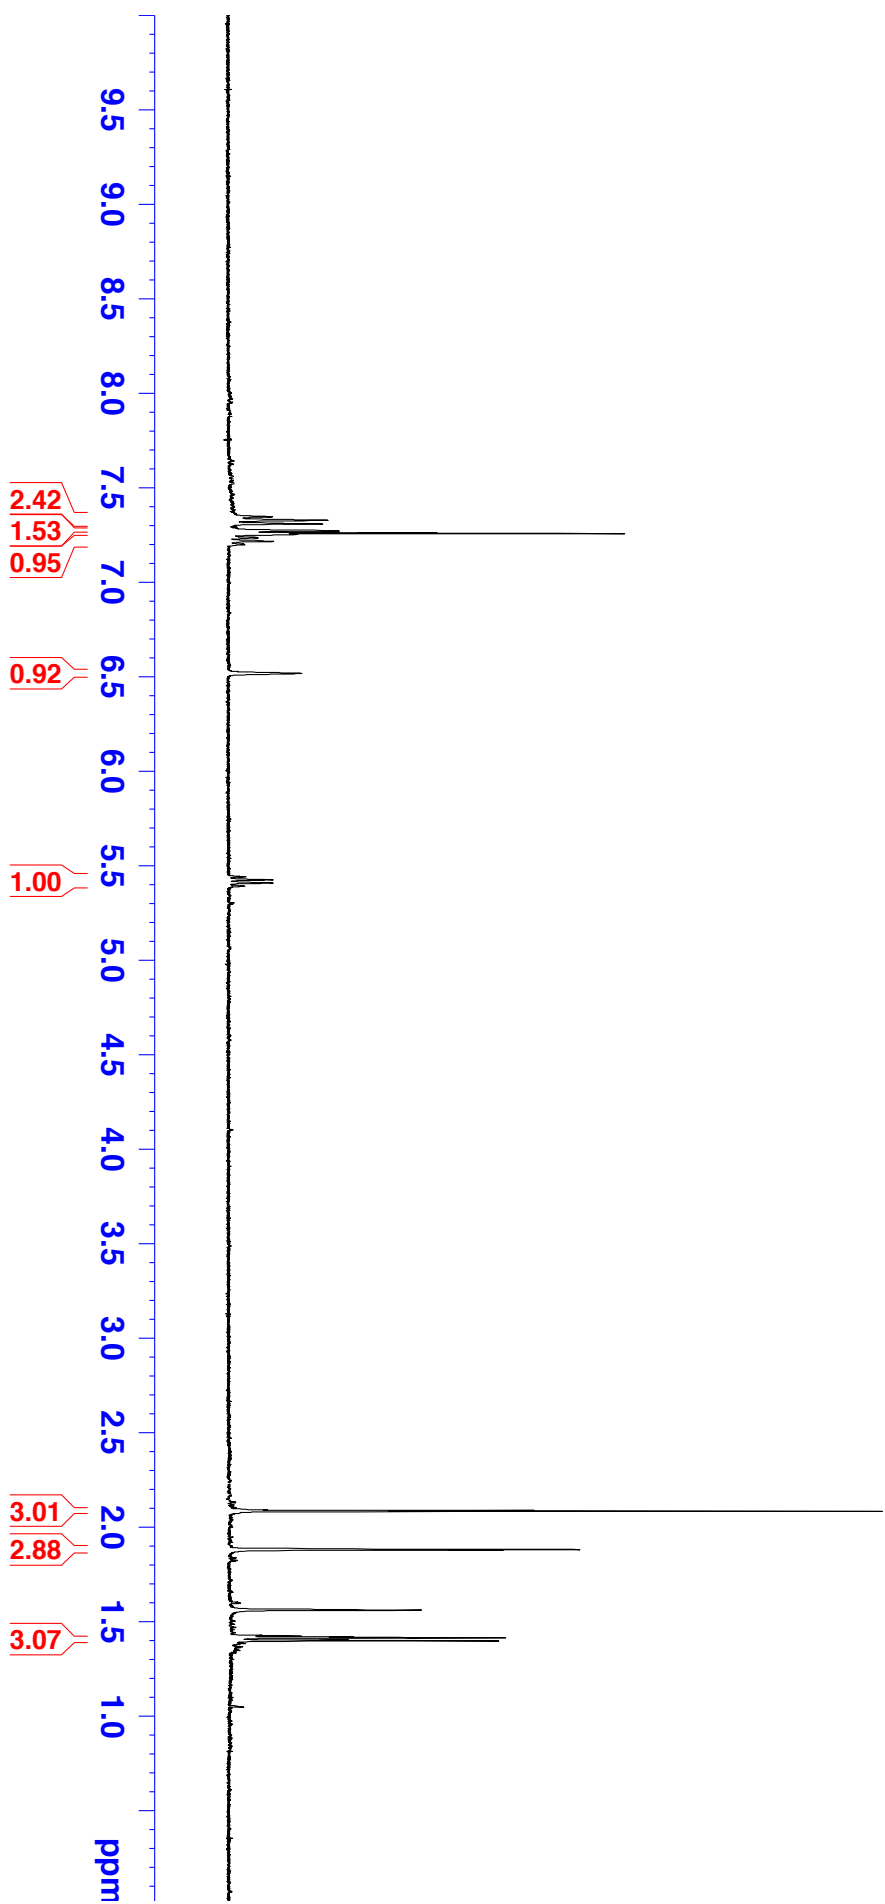

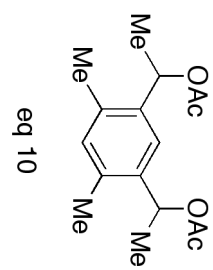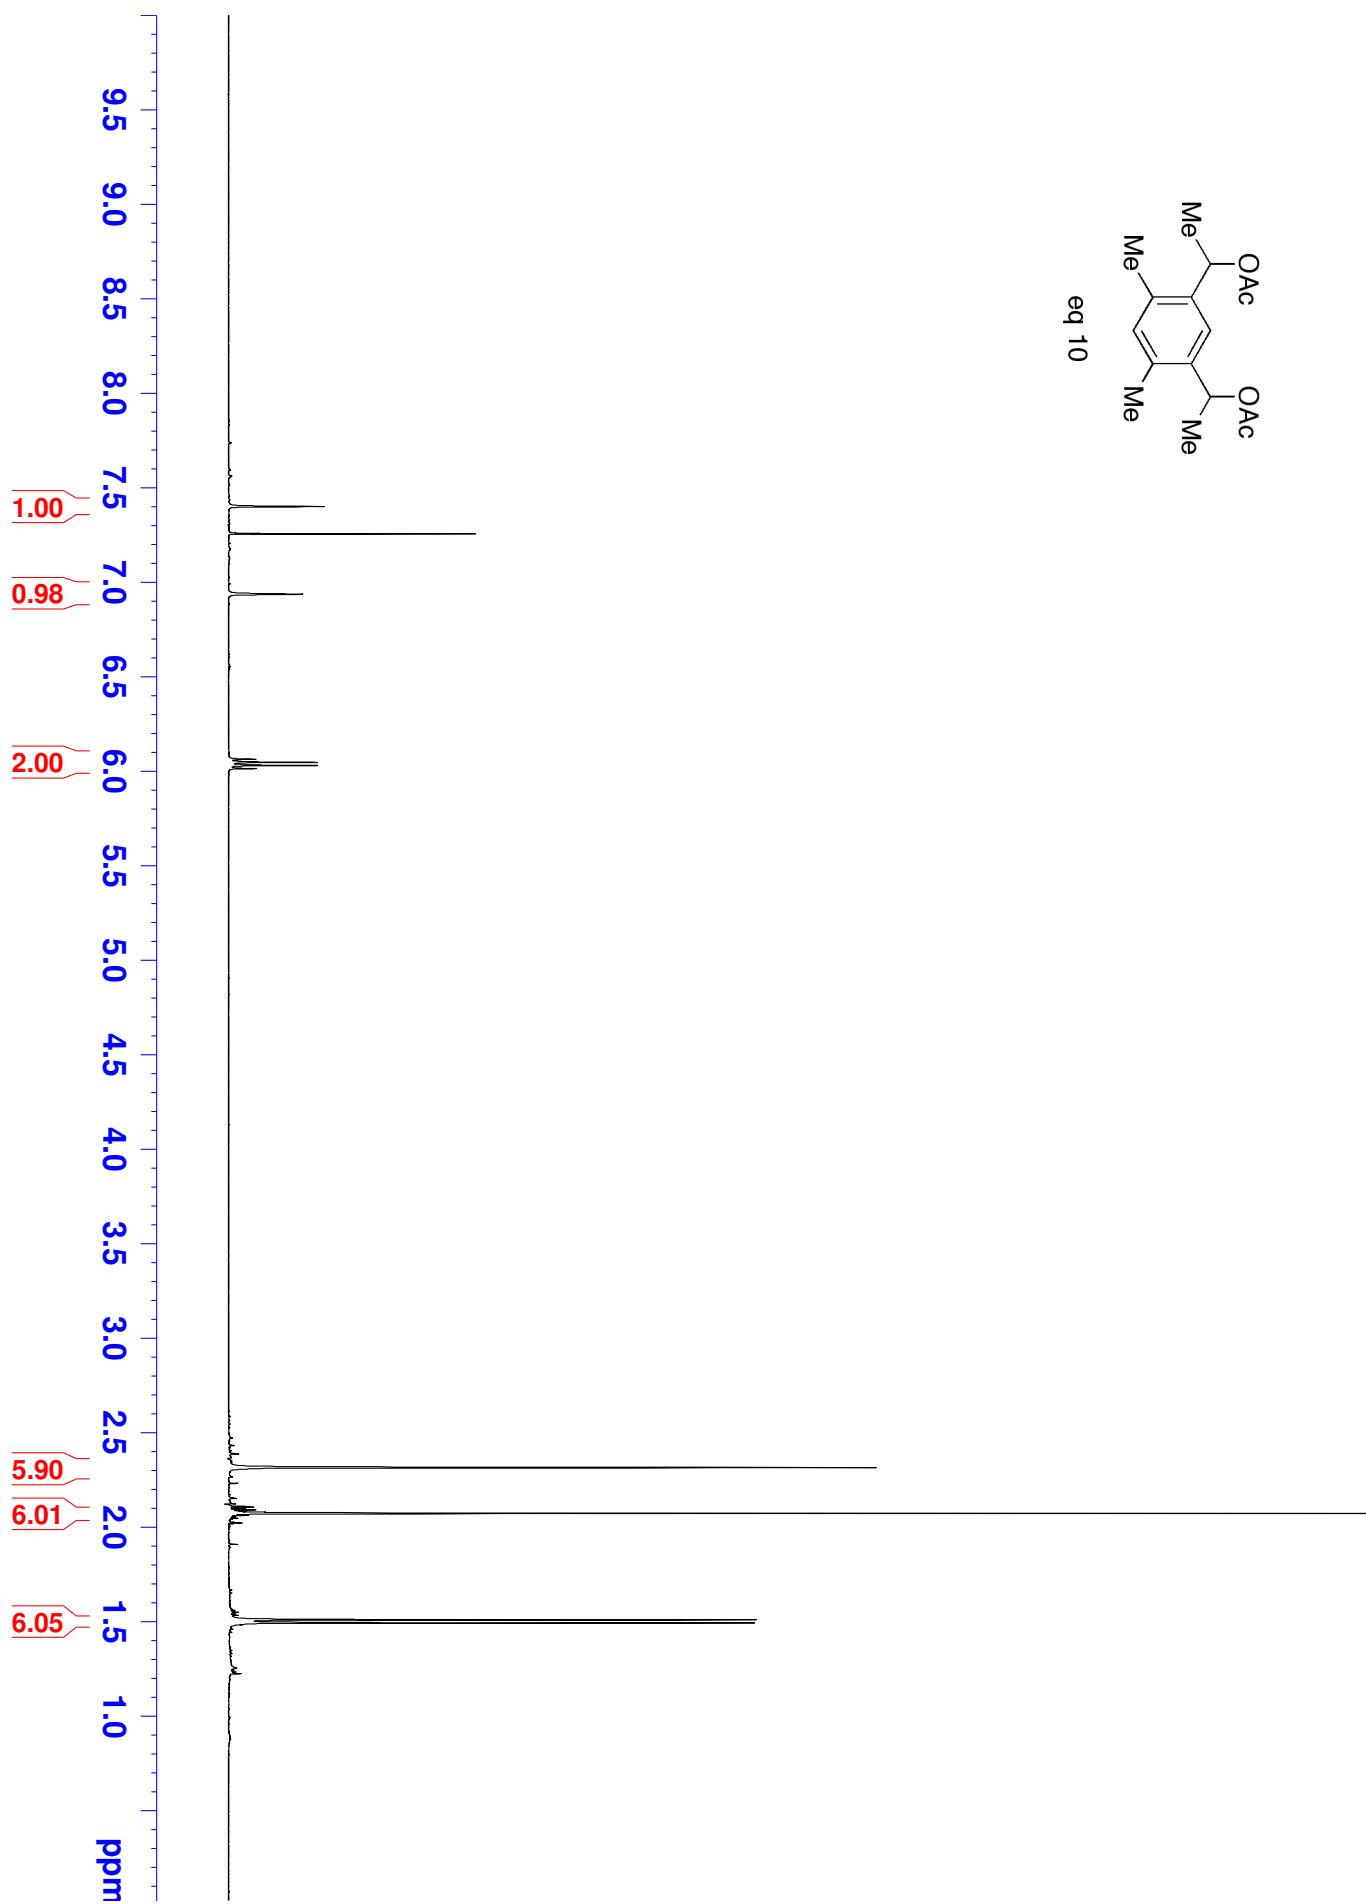

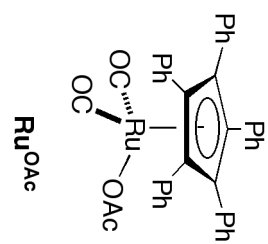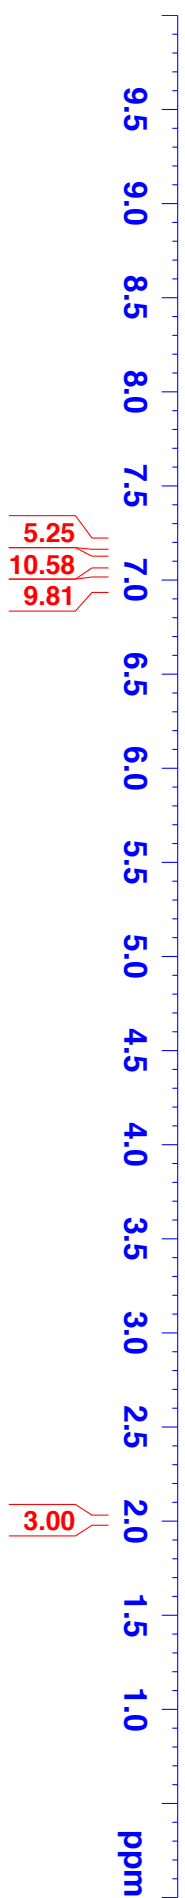

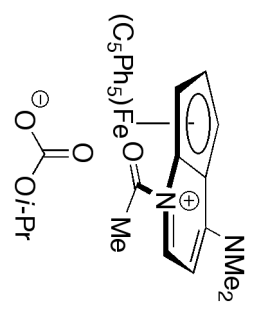

in *t*-amyl alcohol/toluene- $d_8$  (1:1)  
 eq 11

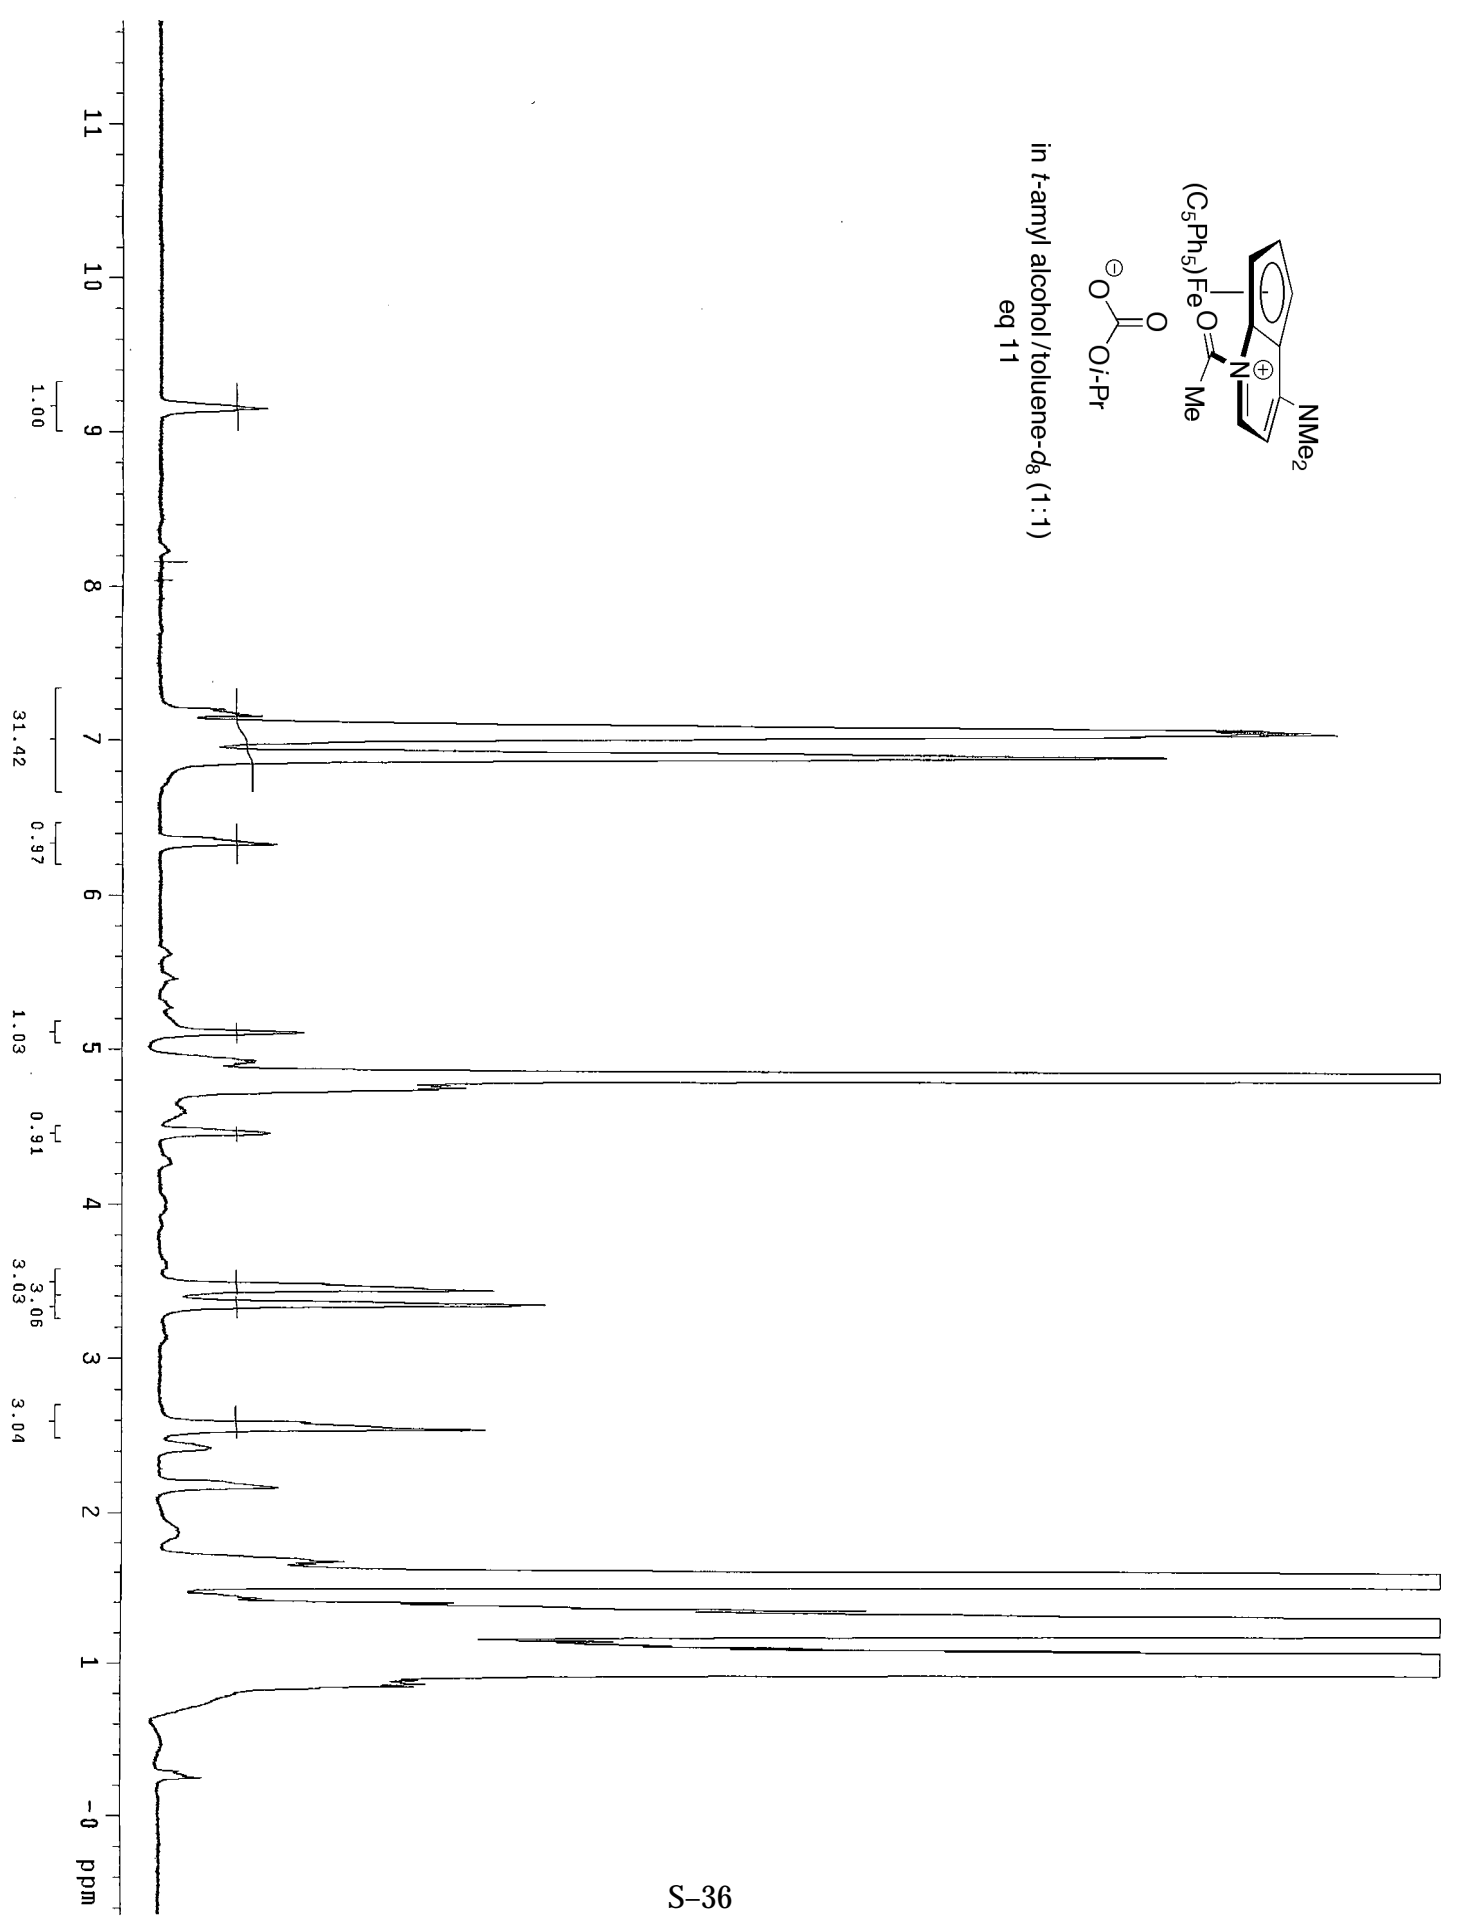

in *t*-amyl alcohol/toluene- $d_6$  (1:1)

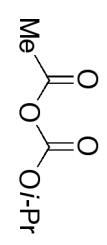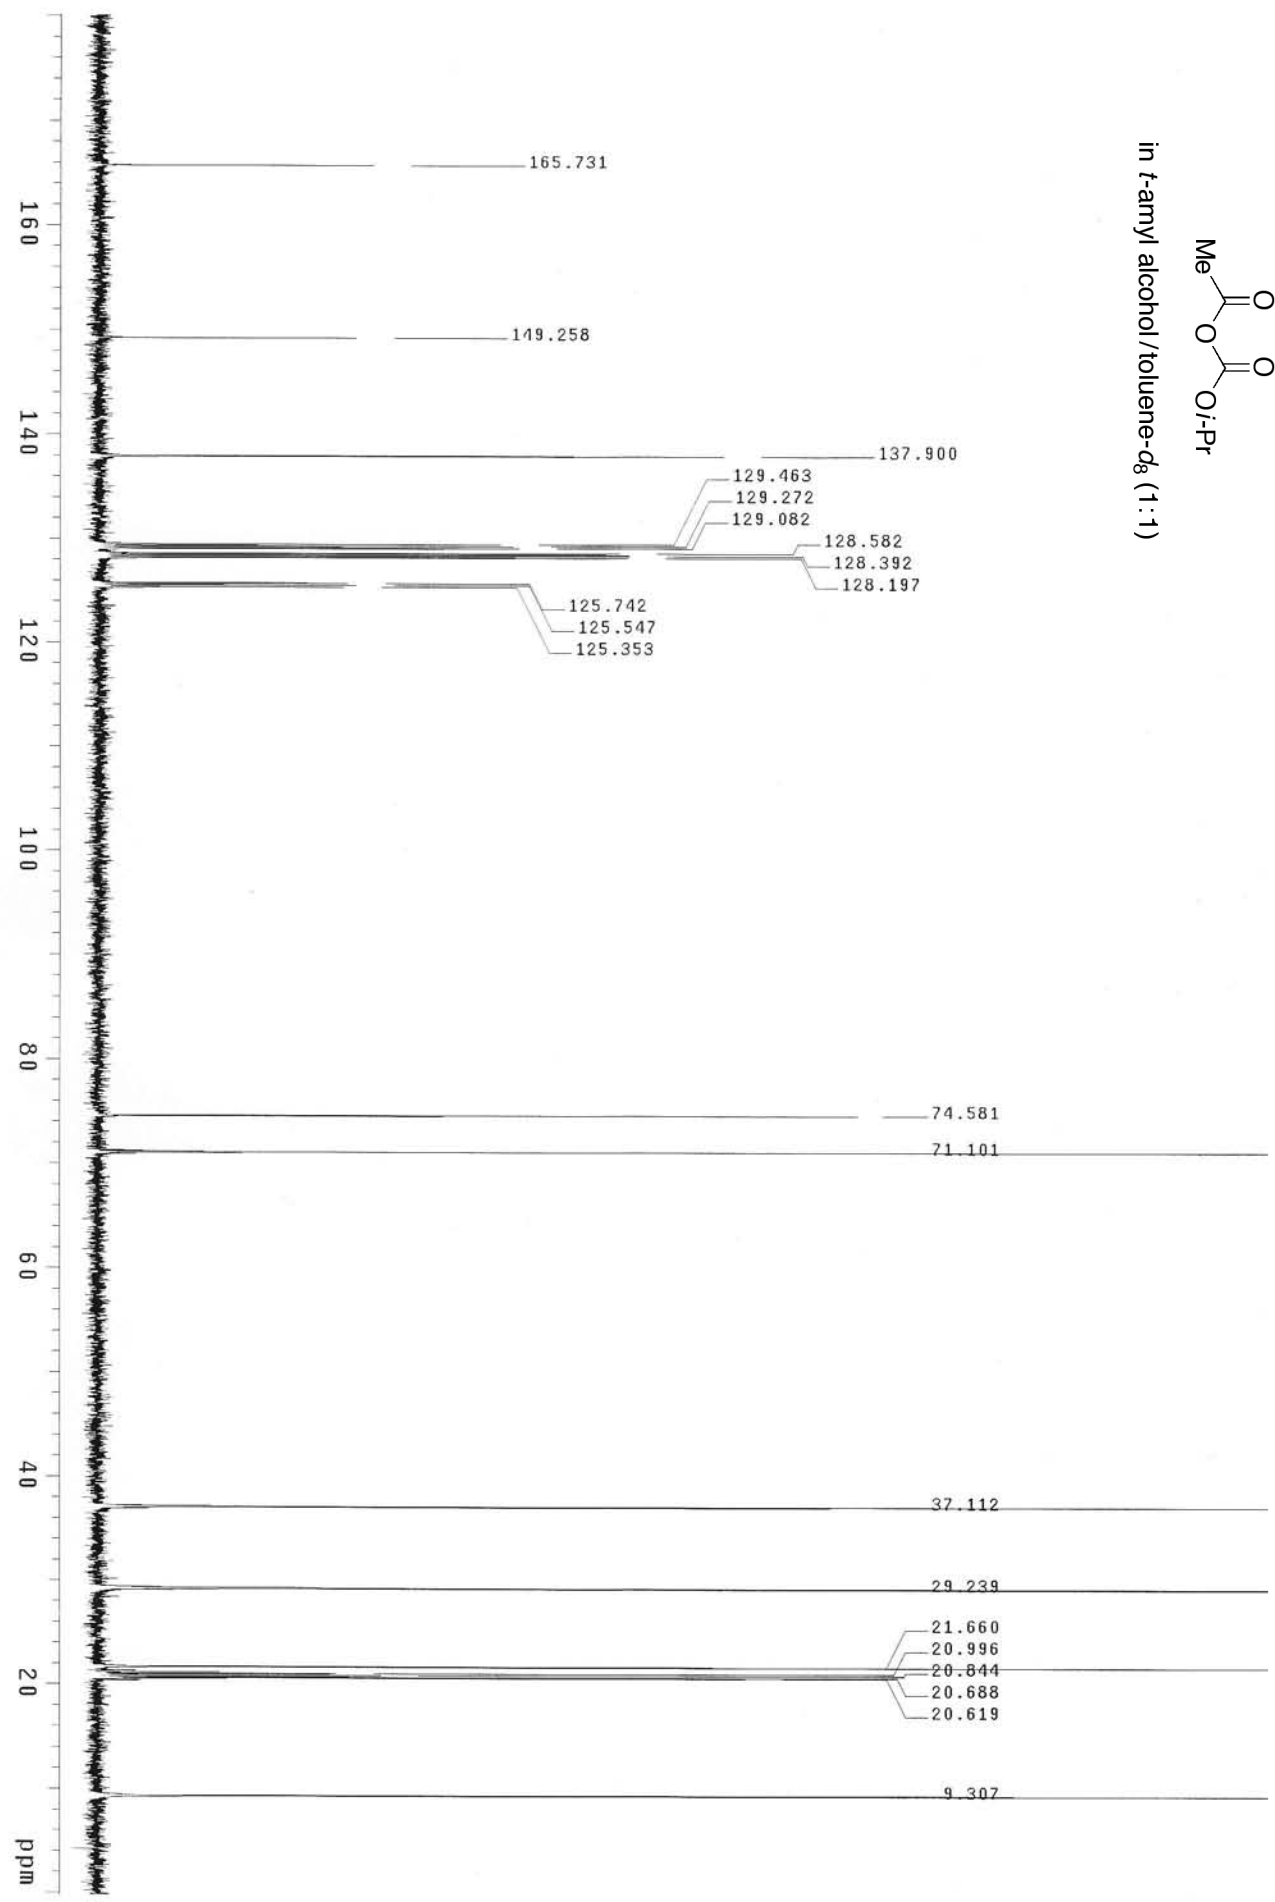

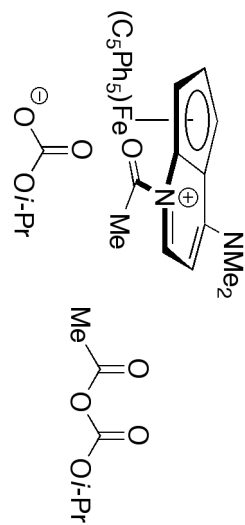

in *t*-amyl alcohol/toluene- $d_8$  (1:1)  
eq 11

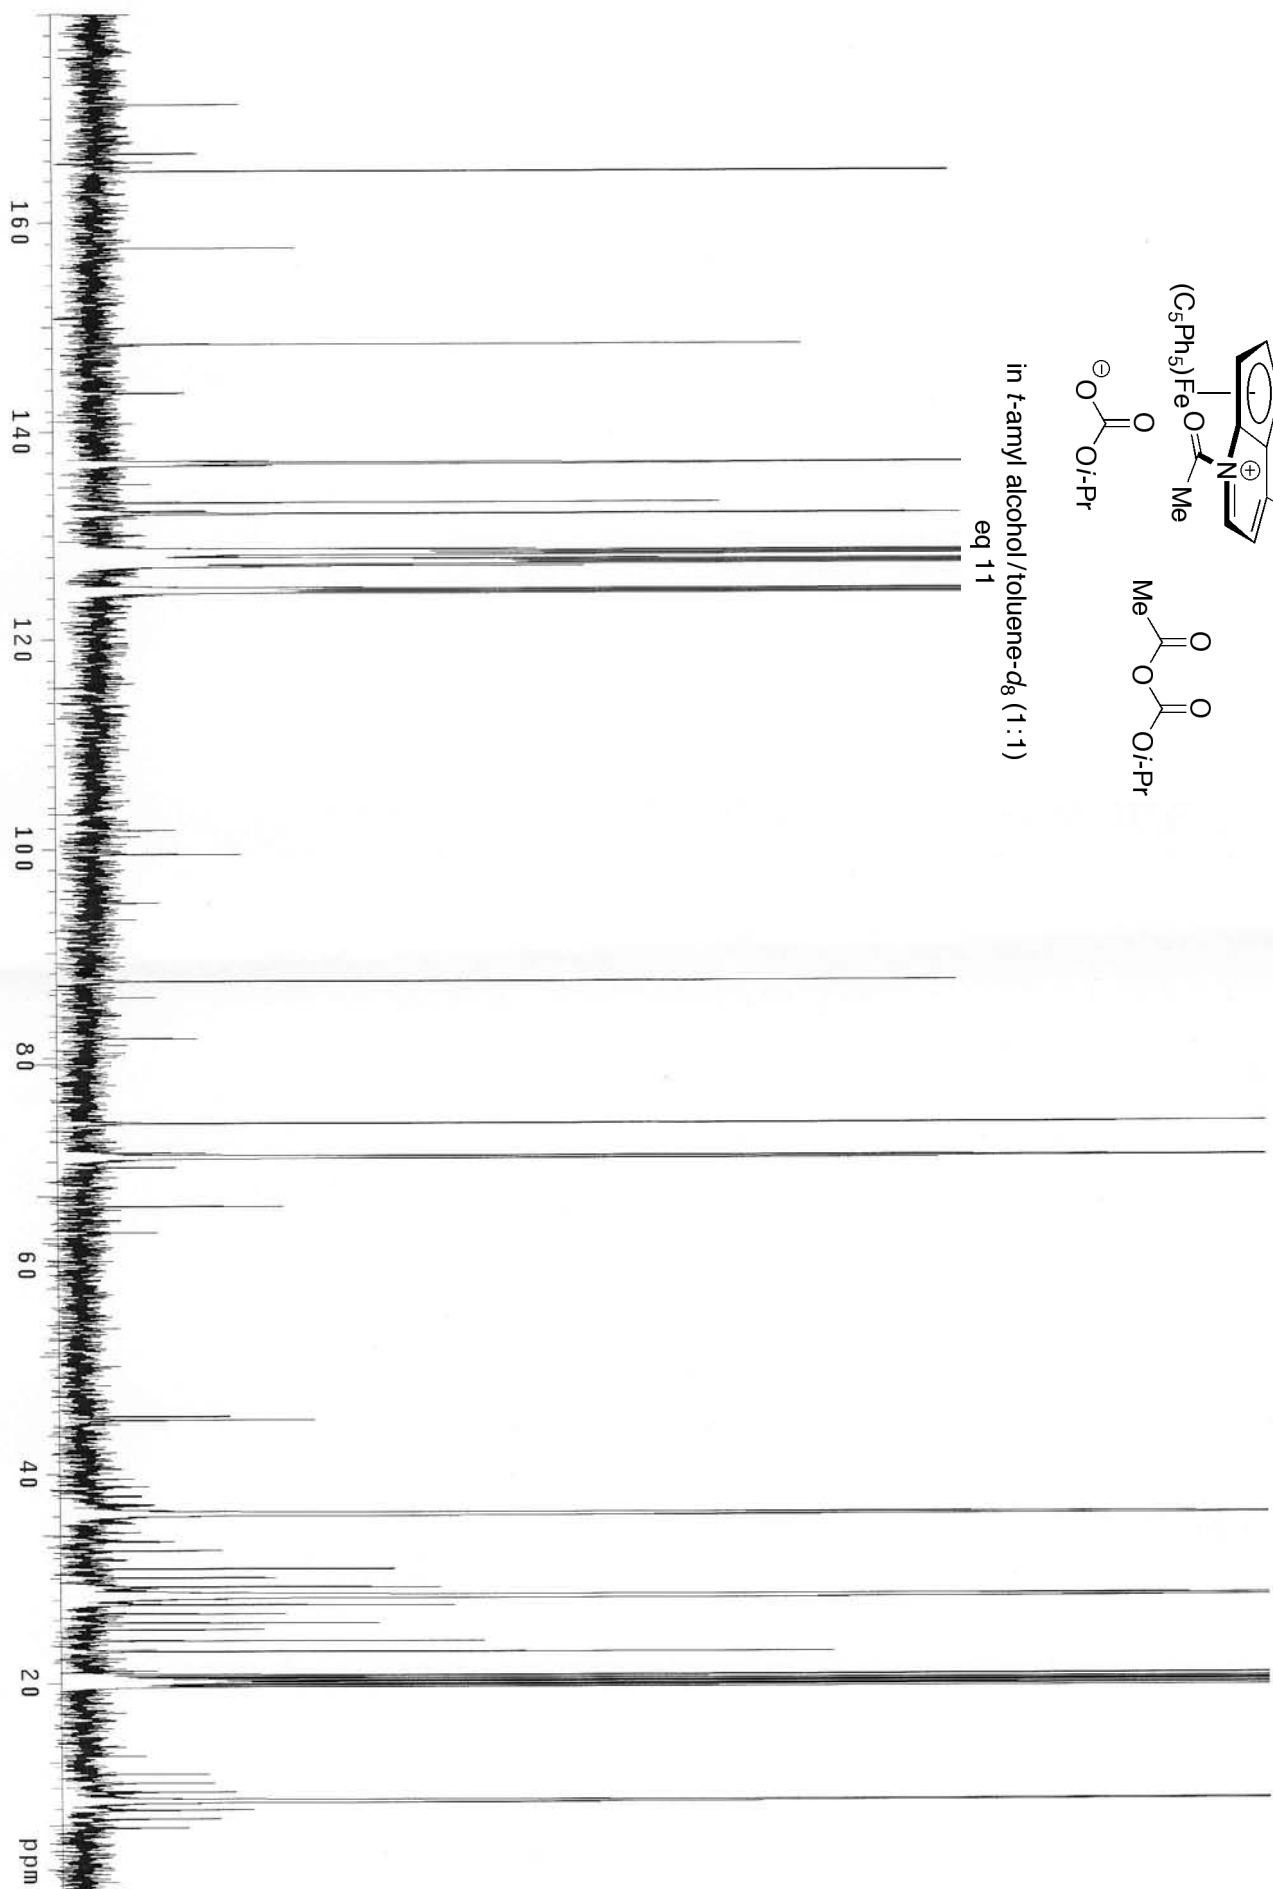

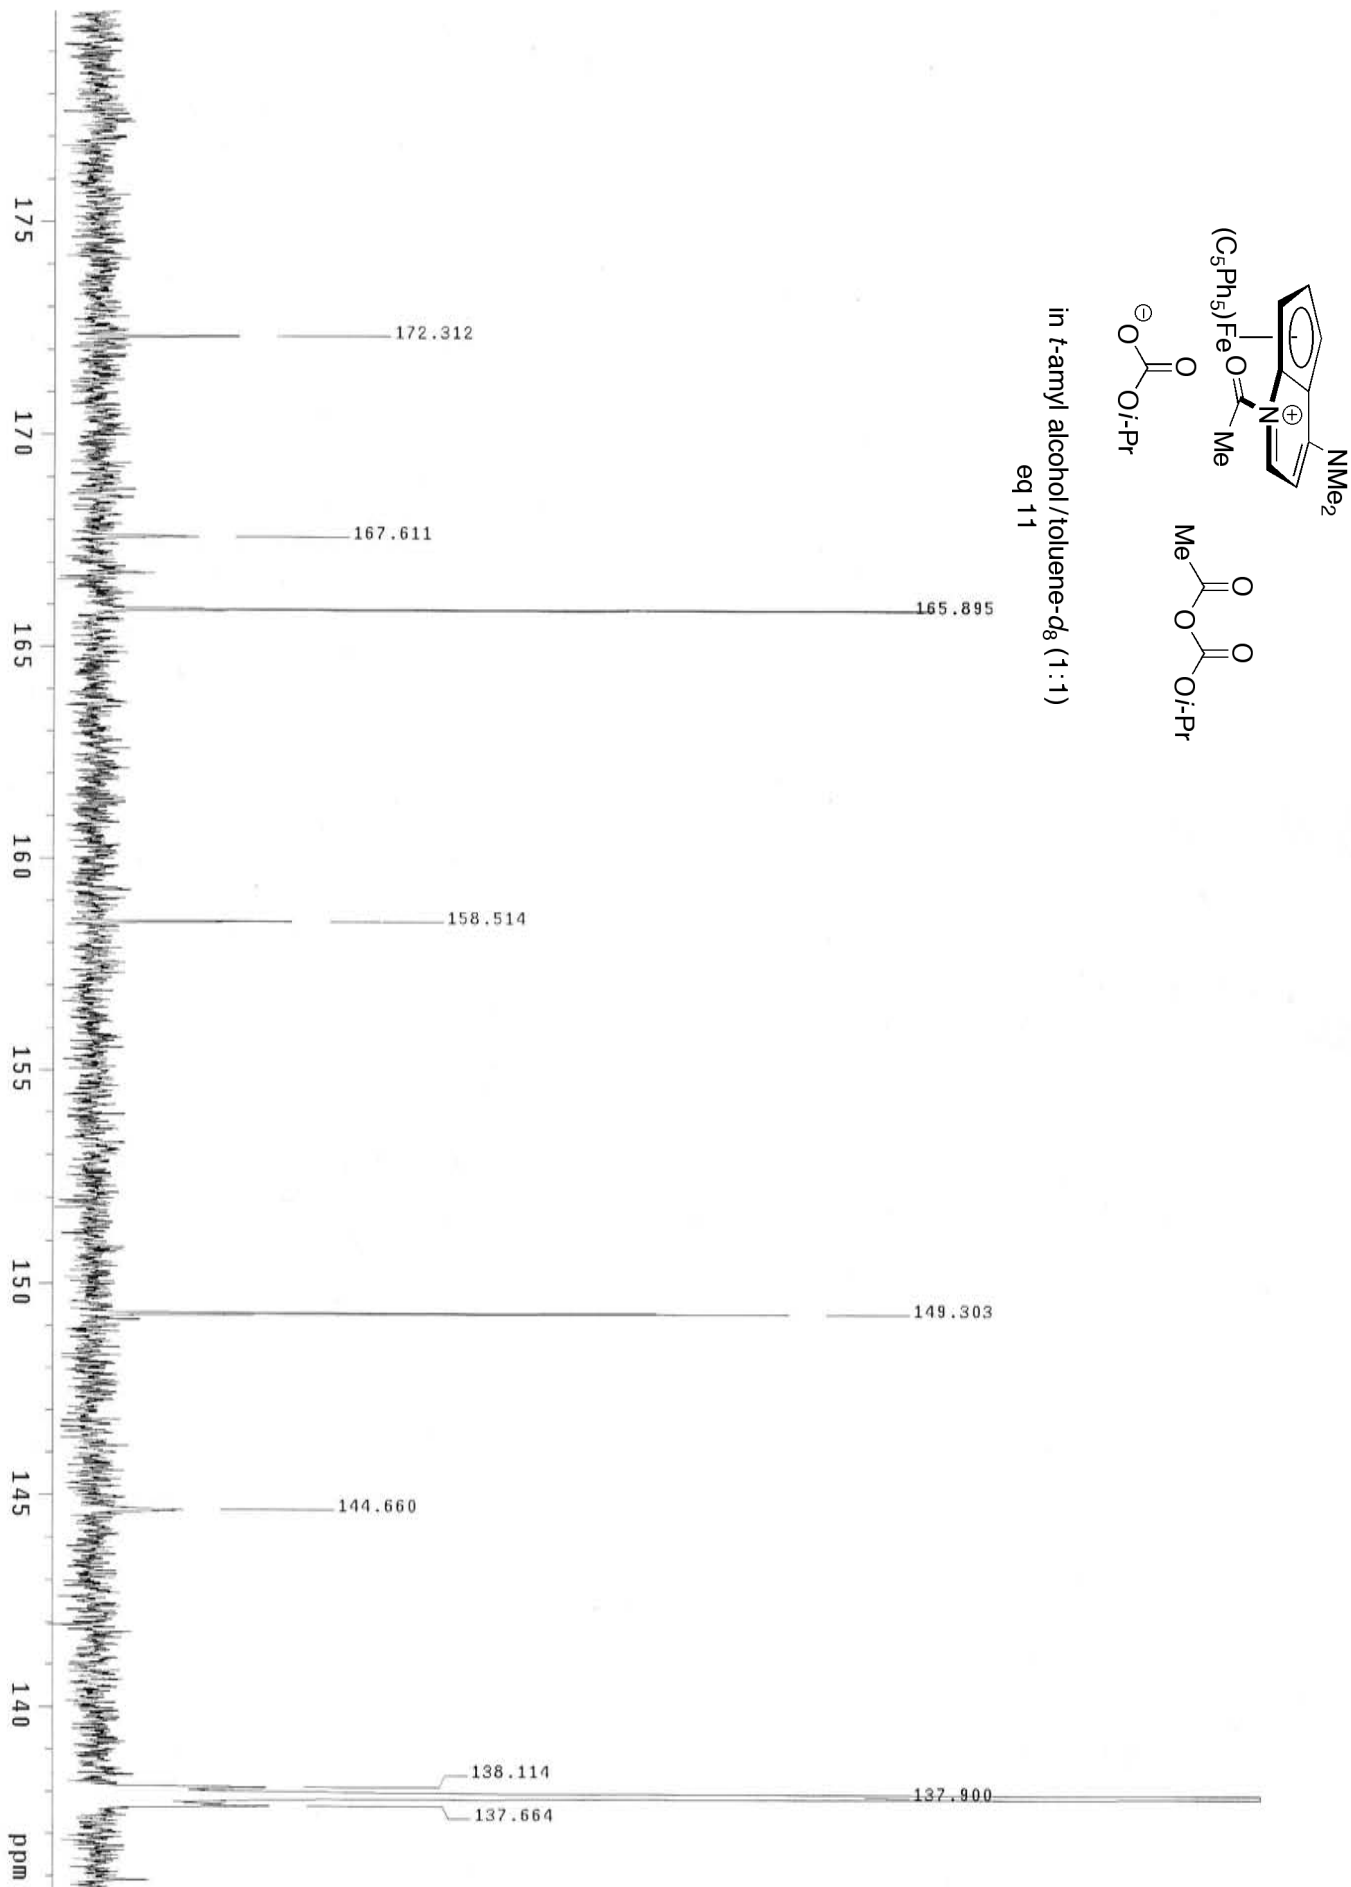

```

=====
Injection Date   : 11/7/2011 9:41:11 PM      Seq. Line :    1
Sample Name     :                          Location  : Vial 2
Acq. Operator   : HD                       Inj       :    1
Acq. Instrument : Instrument 3              Inj Volume: 1 µl
Different Inj Volume from Sequence !      Actual Inj Volume : 3 µl
Acq. Method     : C:\HPCHEM\3\METHODS\AU105115.M
Last changed    : 6/10/2008 10:06:18 AM by BJ
Analysis Method : C:\HPCHEM\3\METHODS\SY90115.M
Last changed    : 12/27/2011 5:54:50 PM by HD
                  (modified after loading)
=====

```

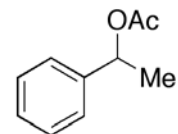

Table 1, entry 1  
with (-)-C<sub>5</sub>Ph<sub>5</sub>-DMAP\*

Initial test

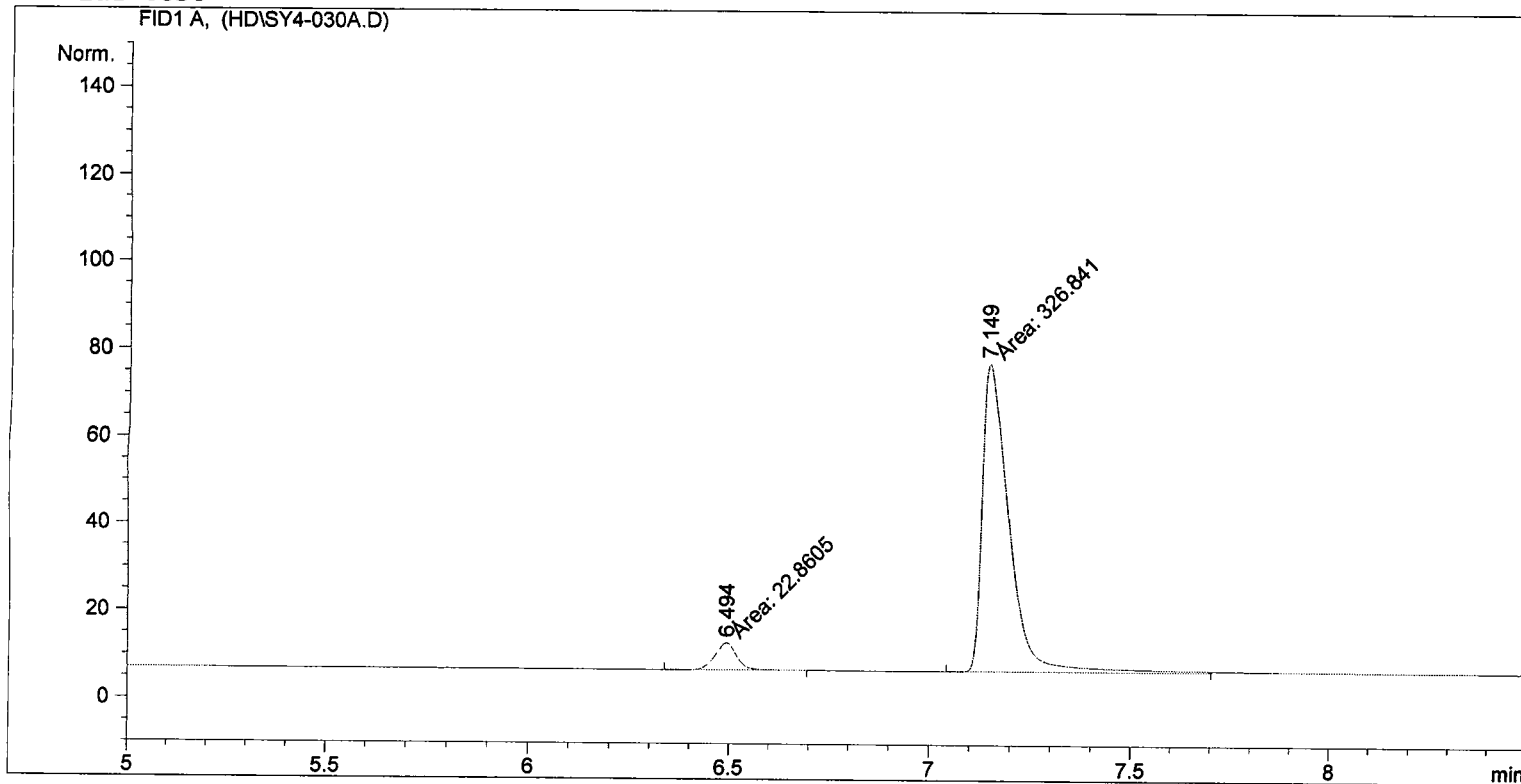

=====  
Area Percent Report  
=====

```

Sorted By      :      Signal
Multiplier     :      1.0000
Dilution       :      1.0000
Use Multiplier & Dilution Factor with ISTDs

```

Signal 1: FID1 A,

| Peak # | RetTime [min] | Type | Width [min] | Area [pA*s] | Height [pA] | Area %   |
|--------|---------------|------|-------------|-------------|-------------|----------|
| 1      | 6.494         | MM   | 0.0623      | 22.86055    | 6.11847     | 6.53716  |
| 2      | 7.149         | MM   | 0.0771      | 326.84085   | 70.63768    | 93.46284 |

Totals :                                    349.70140    76.75615

Results obtained with enhanced integrator!

=====  
\*\*\* End of Report \*\*\*



```

=====
Injection Date   : 11/25/2011 7:08:08 PM          Seq. Line :    3
Sample Name     :                               Location  : Vial 3
Acq. Operator   : SN                           Inj       :    1
Acq. Instrument : Instrument 3                  Inj Volume: 1 µl
Different Inj Volume from Sequence !          Actual Inj Volume : 3 µl
Acq. Method    : C:\HPCHEM\3\METHODS\AU105115.M
Last changed   : 6/10/2008 10:06:18 AM by BJ
Analysis Method: C:\HPCHEM\3\METHODS\SY90115.M
Last changed   : 12/27/2011 5:51:06 PM by HD
                (modified after loading)
=====

```

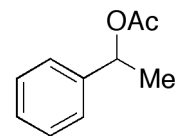

Table 1, entry 1  
with (+)-C<sub>5</sub>Ph<sub>5</sub>-DMAP\*

Initial test

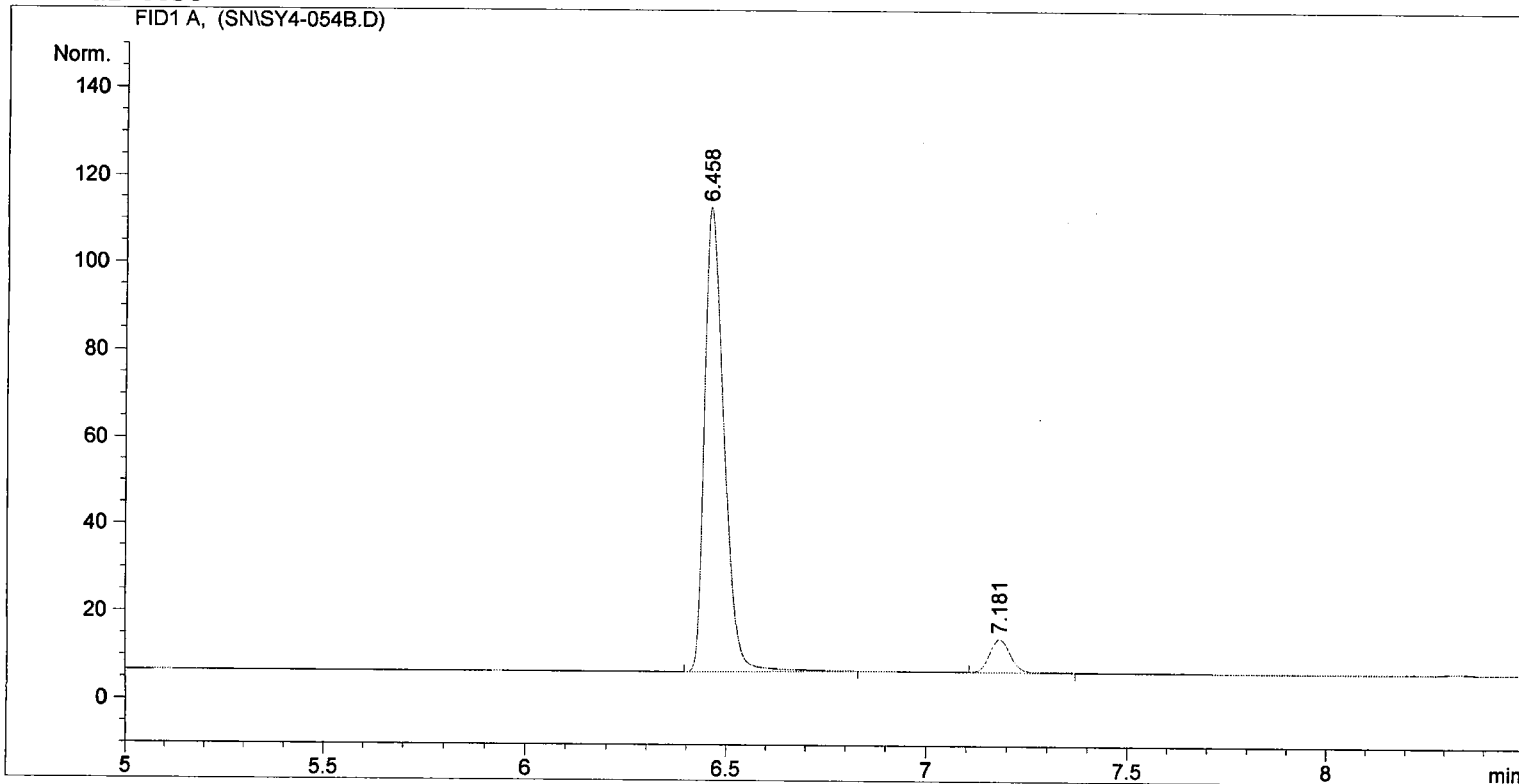

=====  
Area Percent Report  
=====

```

Sorted By      :      Signal
Multiplier     :      1.0000
Dilution       :      1.0000
Use Multiplier & Dilution Factor with ISTDs

```

Signal 1: FID1 A,

| Peak # | RetTime [min] | Type | Width [min] | Area [pA*s] | Height [pA] | Area %   |
|--------|---------------|------|-------------|-------------|-------------|----------|
| 1      | 6.458         | PB   | 0.0513      | 363.56866   | 106.53935   | 93.02377 |
| 2      | 7.181         | BB   | 0.0570      | 27.26548    | 7.49099     | 6.97623  |

Totals :                    390.83414   114.03034

Results obtained with enhanced integrator!

=====  
\*\*\* End of Report \*\*\*

```

=====
Injection Date   : 12/28/2011 12:09:26 AM      Seq. Line   :    7
Sample Name     :                               Location    : Vial 4
Acq. Operator   : HD                           Inj         :    1
Acq. Instrument : Instrument 3                  Inj Volume  : 1 µl
Different Inj Volume from Sequence !          Actual Inj Volume : 2 µl
Acq. Method     : C:\HPCHEM\3\METHODS\SY105115.M
Last changed    : 12/27/2011 7:22:35 PM by HD
Analysis Method : C:\HPCHEM\3\METHODS\SY100ISA.M
Last changed    : 12/28/2011 1:37:54 PM by HD
                  (modified after loading)
=====

```

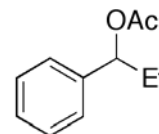

Table 1, entry 2  
with (-)-C<sub>5</sub>Ph<sub>5</sub>-DMAP\*

Initial test

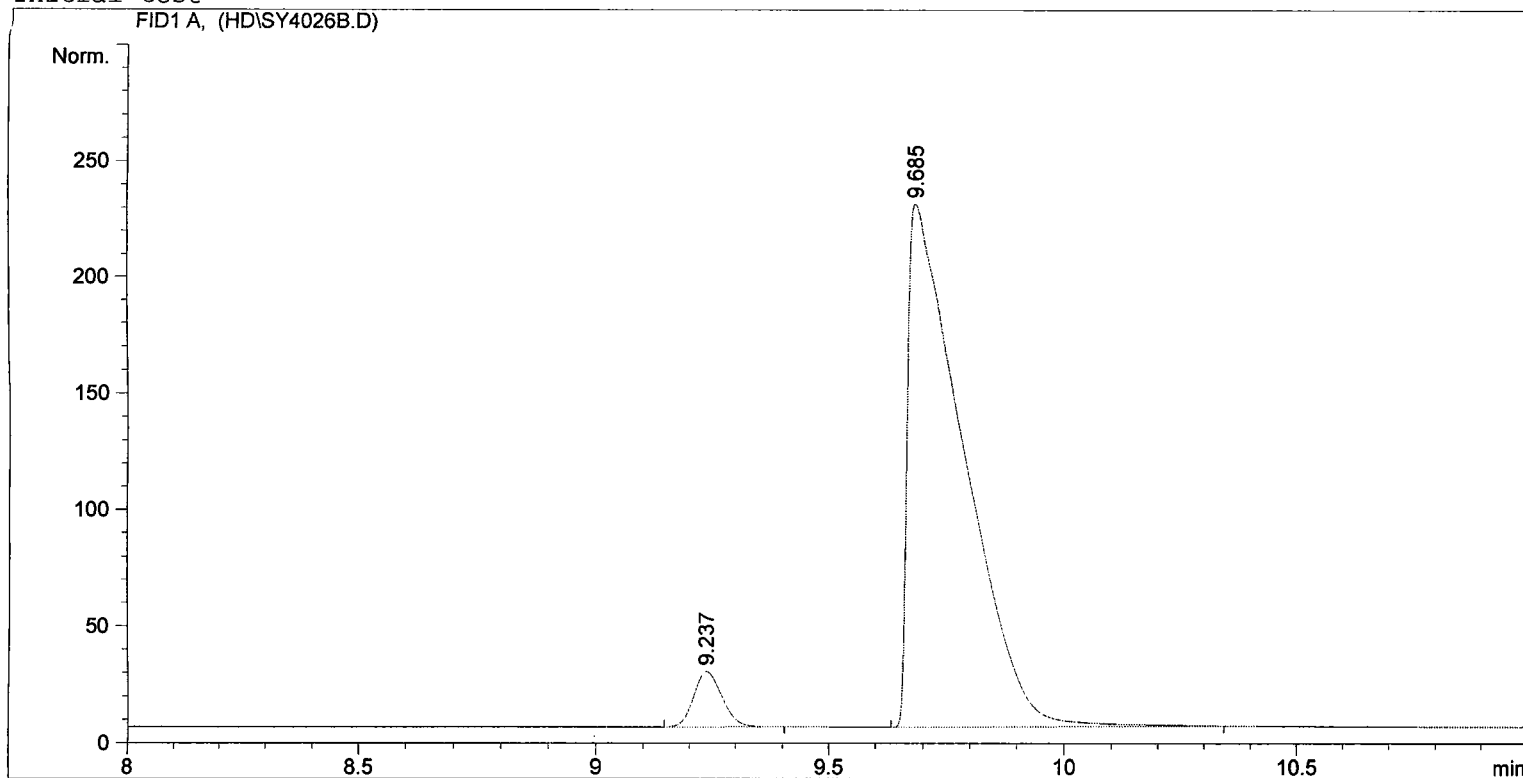

=====  
Area Percent Report  
=====

```

Sorted By       :      Signal
Multiplier      :      1.0000
Dilution       :      1.0000
Use Multiplier & Dilution Factor with ISTDs

```

Signal 1: FID1 A,

| Peak # | RetTime [min] | Type | Width [min] | Area [pA*s] | Height [pA] | Area %   |
|--------|---------------|------|-------------|-------------|-------------|----------|
| 1      | 9.237         | BP   | 0.0667      | 100.69203   | 23.61509    | 5.23181  |
| 2      | 9.685         | PB   | 0.1042      | 1823.91992  | 224.75095   | 94.76819 |

Totals :                                    1924.61195    248.36604

Results obtained with enhanced integrator!

=====  
\*\*\* End of Report \*\*\*

```

=====
Injection Date   : 11/24/2011 3:48:47 PM      Seq. Line :    8
Sample Name     :                             Location  : Vial 1
Acq. Operator  : HD                          Inj       :    1
Acq. Instrument : Instrument 3                 Inj Volume: 1 µl
Different Inj Volume from Sequence !           Actual Inj Volume : 3 µl
Acq. Method    : C:\HPCHEM\3\METHODS\SY105115.M
Last changed   : 11/24/2011 12:17:48 PM by jc
Analysis Method : C:\HPCHEM\3\METHODS\SY90115.M
Last changed   : 12/27/2011 5:47:31 PM by HD
                (modified after loading)
    
```

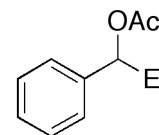

Table 1, entry 2  
with (+)-C<sub>5</sub>Ph<sub>5</sub>-DMAP\*

Initial test

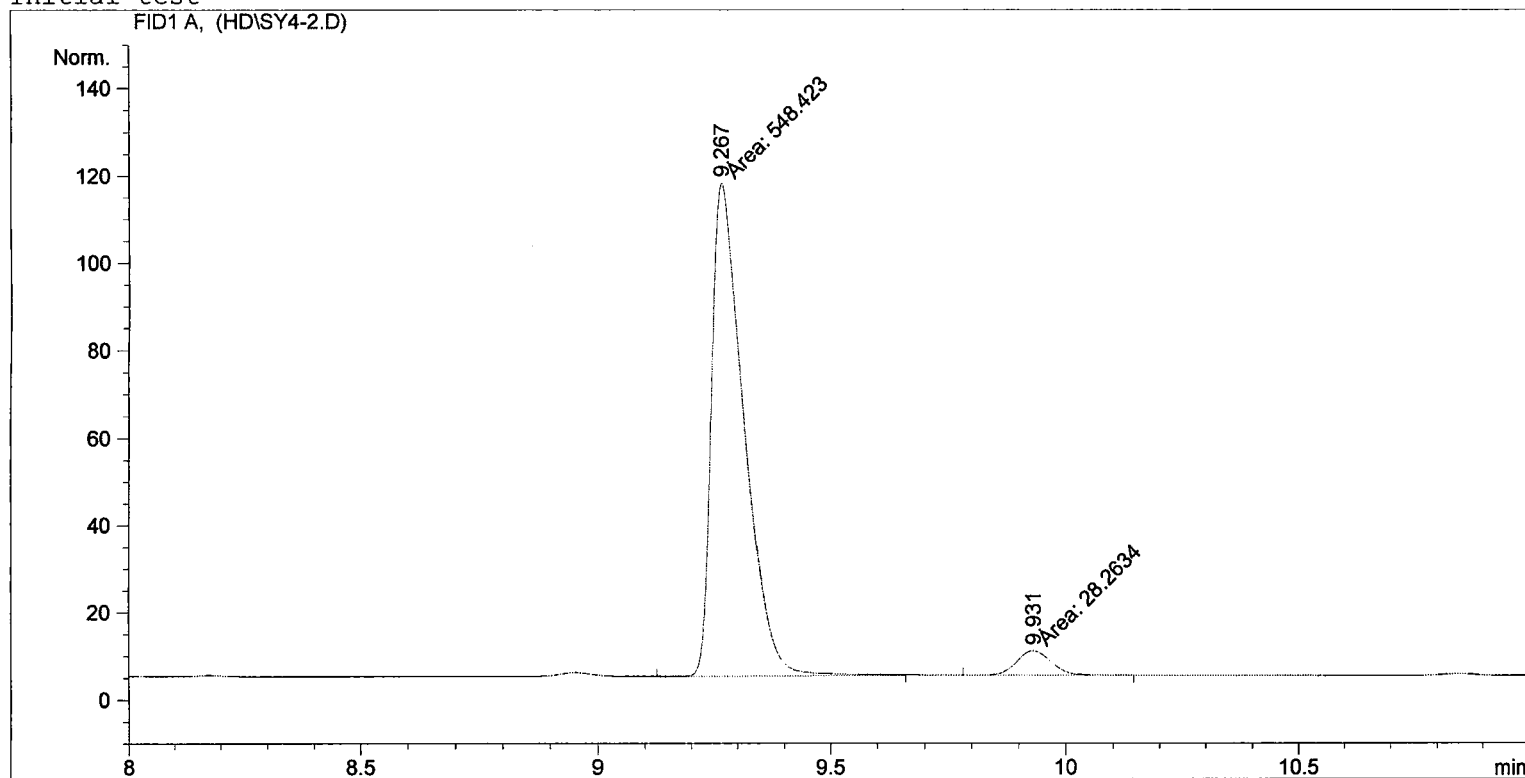

Area Percent Report

```

=====
Sorted By      :      Signal
Multiplier     :      1.0000
Dilution      :      1.0000
Use Multiplier & Dilution Factor with ISTDs
    
```

Signal 1: FID1 A,

| Peak # | RetTime [min] | Type | Width [min] | Area [pA*s] | Height [pA] | Area %   |
|--------|---------------|------|-------------|-------------|-------------|----------|
| 1      | 9.267         | MM   | 0.0809      | 548.42279   | 112.92822   | 95.09900 |
| 2      | 9.931         | MM   | 0.0841      | 28.26339    | 5.60311     | 4.90100  |

Totals :                    576.68618   118.53133

Results obtained with enhanced integrator!

\*\*\* End of Report \*\*\*

Injection Date : 3/1/2012 1:22:20 AM  
 Sample Name : JTM  
 Acq. Operator : JTM  
 Acq. Instrument : Instrument 1  
 Acq. Method : C:\HPCHEM\1\METHODS\ODH-0060.M  
 Last changed : 1/19/2012 5:01:32 PM by SN  
 Analysis Method : C:\HPCHEM\1\METHODS\YL-AD02.M  
 Last changed : 3/1/2012 11:00:43 AM by JTM

Seq. Line : 23  
 Location : Vial 73  
 Inj Volume : 5 µl

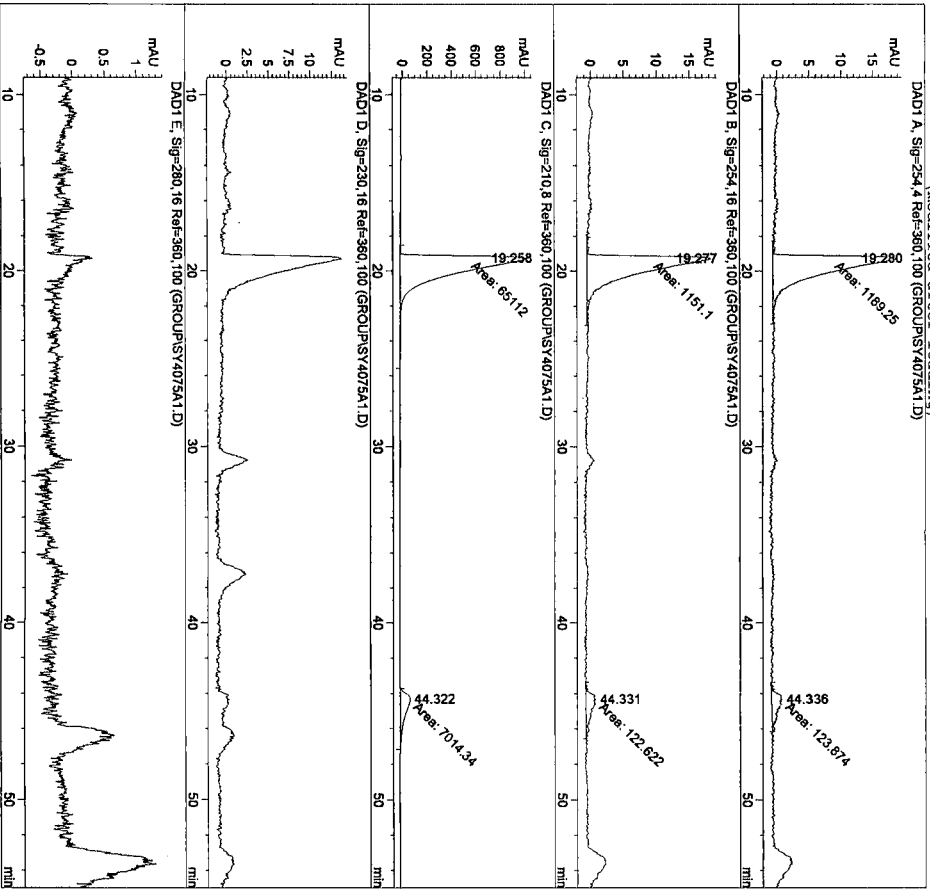

Area Percent Report  
 Sorted By : Signal  
 Multiplier : 1.0000  
 Dilution : 1.0000  
 Use Multiplier & Dilution Factor with ISTDs

Signal 1: DAD1 A, Sig=254,4 Ref=360,100

| Peak #   | RetTime [min] | Type | Width [min] | Area [mAU*s] | Height [mAU] | Area %  |
|----------|---------------|------|-------------|--------------|--------------|---------|
| 1        | 19.280        | NM   | 1.0234      | 1189.24658   | 19.36803     | 90.5665 |
| 2        | 44.336        | NM   | 1.2010      | 123.87383    | 1.71897      | 9.4335  |
| Totals : |               |      |             | 1313.12041   | 21.08699     |         |

Signal 2: DAD1 B, Sig=254,16 Ref=360,100

| Peak #   | RetTime [min] | Type | Width [min] | Area [mAU*s] | Height [mAU] | Area %  |
|----------|---------------|------|-------------|--------------|--------------|---------|
| 1        | 19.277        | NM   | 1.0216      | 1151.10132   | 18.77863     | 90.3730 |
| 2        | 44.331        | NM   | 1.2736      | 122.62193    | 1.60466      | 9.6270  |
| Totals : |               |      |             | 1273.72325   | 20.38329     |         |

Signal 3: DAD1 C, Sig=210,8 Ref=360,100

| Peak #   | RetTime [min] | Type | Width [min] | Area [mAU*s] | Height [mAU] | Area %  |
|----------|---------------|------|-------------|--------------|--------------|---------|
| 1        | 19.258        | NM   | 1.0545      | 6.5112064    | 1029.08911   | 90.2749 |
| 2        | 44.322        | NM   | 1.3988      | 7014.33838   | 83.57714     | 9.7251  |
| Totals : |               |      |             | 7.2126464    | 1112.66625   |         |

Results obtained with enhanced integrator!  
 Signal 4: DAD1 D, Sig=230,16 Ref=360,100  
 Signal 5: DAD1 E, Sig=280,16 Ref=360,100

\*\*\* End of Report \*\*\*

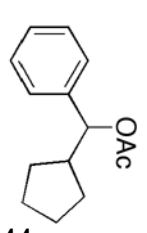

Table 1, entry 3  
 with (-)-C<sub>5</sub>Ph<sub>5</sub>-DMAP\*

Injection Date : 2/28/2012 7:45:00 PM  
 Sample Name :  
 Acq. Operator : JTM  
 Acq. Instrument : Instrument 1  
 Acq. Method : C:\HPCHEM\1\METHODS\ODH-0060.M  
 Last changed : 1/19/2012 5:01:32 PM by SN  
 Analysis Method : C:\HPCHEM\1\METHODS\YI-AD02.M  
 Last changed : 2/28/2012 8:45:25 PM by JTM

Seq. Line : 6  
 Location : Vial 71  
 Inj : 1  
 Inj Volume : 5 µl

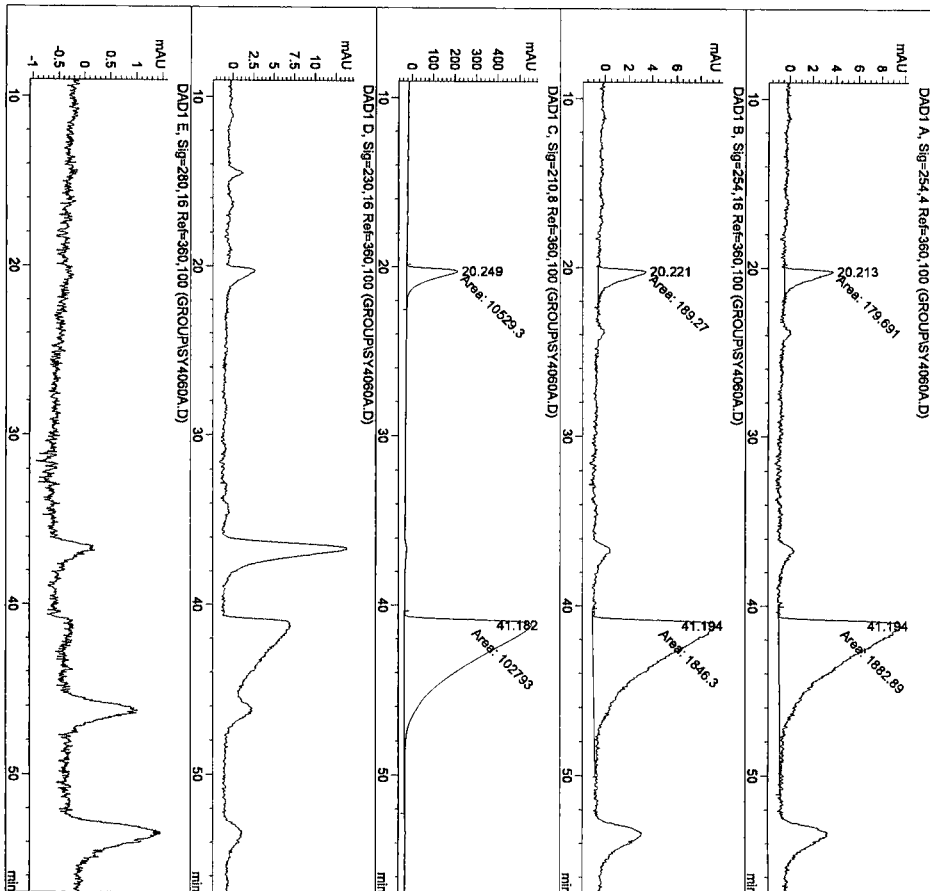

Area Percent Report  
 Sorted By : Signal  
 Multiplier : 1.0000  
 Dilution : 1.0000  
 Use Multiplier & Dilution Factor with ISTDs

Signal 1: DAD1 A, Sig=254,4 Ref=360,100

| Peak #   | RetTime [min] | Type | Width [min] | Area [mAU*s] | Height [mAU] | Area %  |
|----------|---------------|------|-------------|--------------|--------------|---------|
| 1        | 20.213        | MM   | 0.7092      | 179.69051    | 4.22263      | 8.7119  |
| 2        | 41.194        | MM   | 2.9283      | 1882.89256   | 10.71659     | 91.2881 |
| Totals : |               |      |             | 2062.58308   | 14.93922     |         |

Signal 2: DAD1 B, Sig=254,16 Ref=360,100

| Peak #   | RetTime [min] | Type | Width [min] | Area [mAU*s] | Height [mAU] | Area %  |
|----------|---------------|------|-------------|--------------|--------------|---------|
| 1        | 20.221        | MM   | 0.7715      | 189.27020    | 4.08862      | 9.2981  |
| 2        | 41.194        | MM   | 2.9698      | 1846.30212   | 10.36168     | 90.7019 |
| Totals : |               |      |             | 2035.57233   | 14.45030     |         |

Signal 3: DAD1 C, Sig=210,8 Ref=360,100

| Peak #   | RetTime [min] | Type | Width [min] | Area [mAU*s] | Height [mAU] | Area %  |
|----------|---------------|------|-------------|--------------|--------------|---------|
| 1        | 20.249        | MM   | 0.7388      | 1.0529364    | 237.52646    | 9.2915  |
| 2        | 41.182        | MM   | 2.9146      | 1.0279365    | 587.81067    | 90.7085 |
| Totals : |               |      |             | 1.1332265    | 825.33713    |         |

Results obtained with enhanced integrator!  
 Signal 4: DAD1 D, Sig=230,16 Ref=360,100  
 Signal 5: DAD1 E, Sig=280,16 Ref=360,100

\*\*\* End of Report \*\*\*

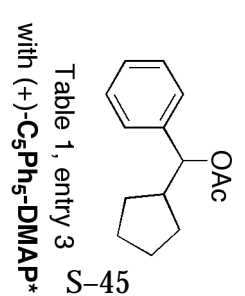

```

=====
Injection Date   : 12/28/2011 12:45:56 AM      Seq. Line   :    8
Sample Name     :                               Location    : Vial 5
Acq. Operator   : HD                           Inj         :    1
Acq. Instrument : Instrument 3                  Inj Volume  : 1 µl
Different Inj Volume from Sequence !          Actual Inj Volume : 2 µl
Acq. Method     : C:\HPCHEM\3\METHODS\SY105115.M
Last changed    : 12/27/2011 7:22:35 PM by HD
Analysis Method : C:\HPCHEM\3\METHODS\SY100ISA.M
Last changed    : 12/28/2011 1:39:13 PM by HD
                  (modified after loading)
    
```

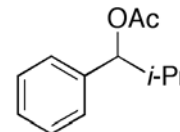

Table 1, entry 4  
with (-)-C<sub>5</sub>Ph<sub>5</sub>-DMAP\*

Initial test

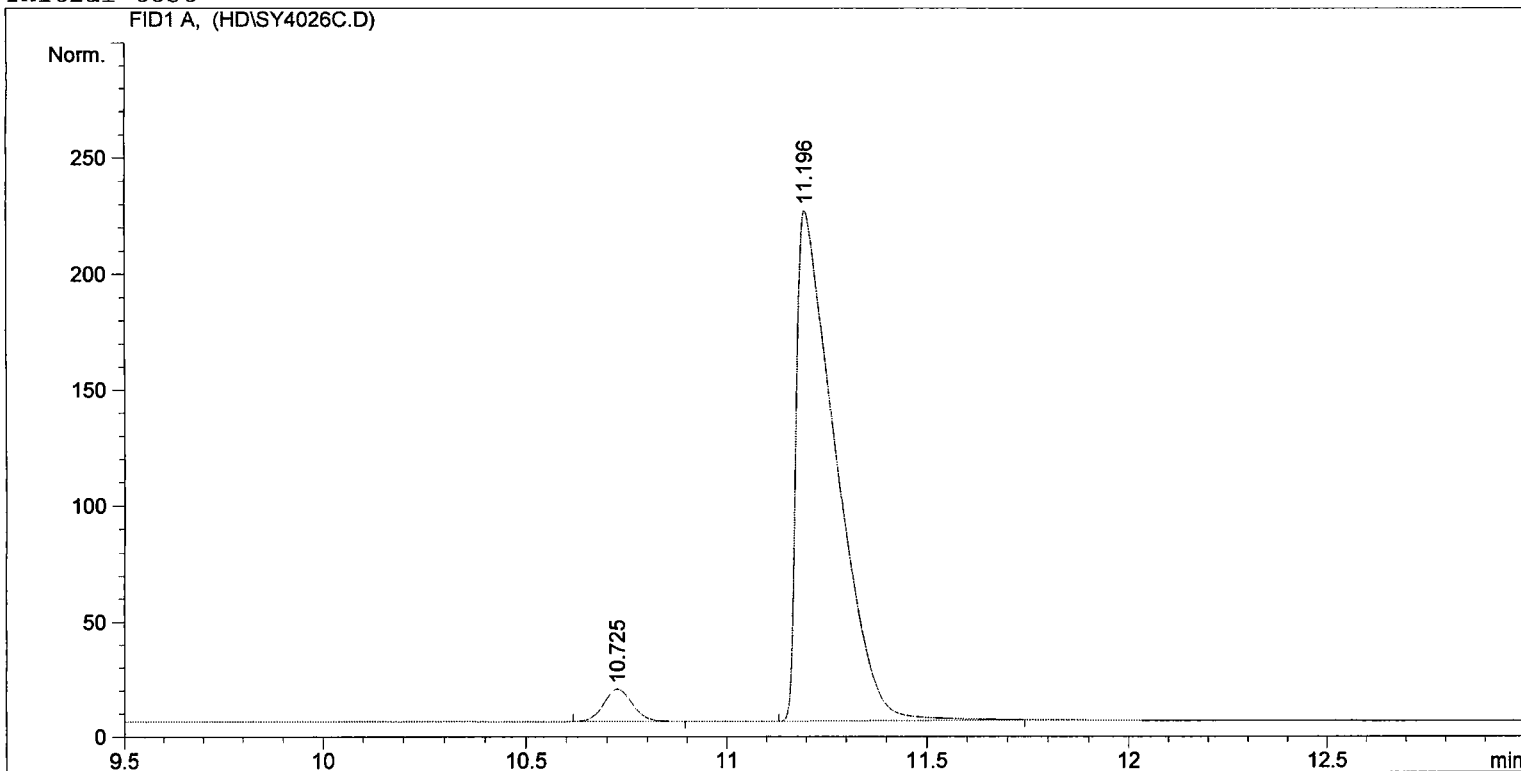

=====  
Area Percent Report  
=====

```

Sorted By      :      Signal
Multiplier     :      1.0000
Dilution      :      1.0000
Use Multiplier & Dilution Factor with ISTDs
    
```

Signal 1: FID1 A,

| Peak # | RetTime [min] | Type | Width [min] | Area [pA*s] | Height [pA] | Area %   |
|--------|---------------|------|-------------|-------------|-------------|----------|
| 1      | 10.725        | BB   | 0.0768      | 69.37827    | 14.00787    | 4.39299  |
| 2      | 11.196        | PB   | 0.0933      | 1509.91589  | 220.63409   | 95.60701 |

Totals :                           1579.29417   234.64197

Results obtained with enhanced integrator!

=====  
\*\*\* End of Report \*\*\*

```

=====
Injection Date   : 12/10/2011 7:18:42 PM      Seq. Line   : 11
Sample Name     :                               Location    : Vial 2
Acq. Operator  : hd                            Inj         : 1
Acq. Instrument : Instrument 3                  Inj Volume  : 1 µl
Different Inj Volume from Sequence !          Actual Inj Volume : 3 µl
Acq. Method    : C:\HPCHEM\3\METHODS\SY105115.M
Last changed   : 11/24/2011 12:17:48 PM by jc
Analysis Method : C:\HPCHEM\3\METHODS\SY90115.M
Last changed   : 12/27/2011 6:04:59 PM by HD
                (modified after loading)
    
```

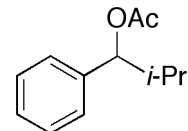

Table 1, entry 4  
with (+)-C<sub>5</sub>Ph<sub>5</sub>-DMAP\*

Initial test

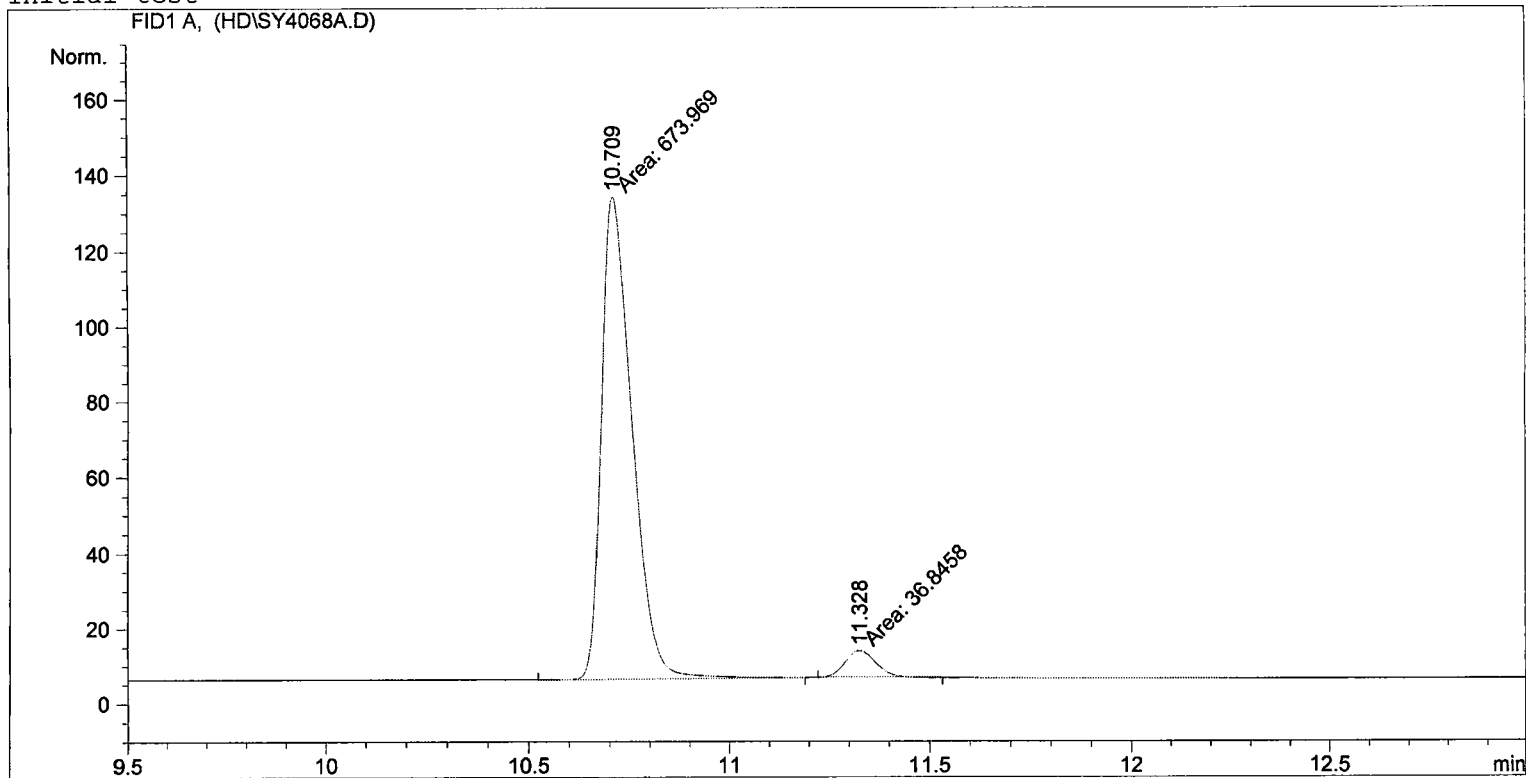

=====  
Area Percent Report  
=====

```

Sorted By      : Signal
Multiplier     : 1.0000
Dilution       : 1.0000
Use Multiplier & Dilution Factor with ISTDs
    
```

Signal 1: FID1 A,

| Peak # | RetTime [min] | Type | Width [min] | Area [pA*s] | Height [pA] | Area %   |
|--------|---------------|------|-------------|-------------|-------------|----------|
| 1      | 10.709        | MM   | 0.0879      | 673.96893   | 127.77182   | 94.81639 |
| 2      | 11.328        | MM   | 0.0871      | 36.84584    | 7.04818     | 5.18361  |

Totals : 710.81477 134.82000

Results obtained with enhanced integrator!

=====  
\*\*\* End of Report \*\*\*

```

=====
Injection Date : 12/28/2011 4:09:40 PM      Seq. Line : 11
Sample Name   :                               Location  : Vial 3
Acq. Operator : HD                           Inj       : 1
Acq. Instrument : Instrument 3                Inj Volume: 1 µl
Different Inj Volume from Sequence !      Actual Inj Volume : 2 µl
Acq. Method   : C:\HPCHEM\3\METHODS\AU105115.M
Last changed  : 6/10/2008 10:06:18 AM by BJ
Analysis Method : C:\HPCHEM\3\METHODS\SY100ISA.M
Last changed  : 12/28/2011 6:10:33 PM by HD
                (modified after loading)
=====
    
```

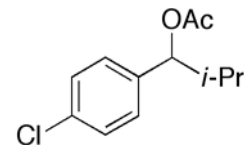

Table 1, entry 5  
with (-)-C<sub>5</sub>Ph<sub>5</sub>-DMAP\*

Initial test

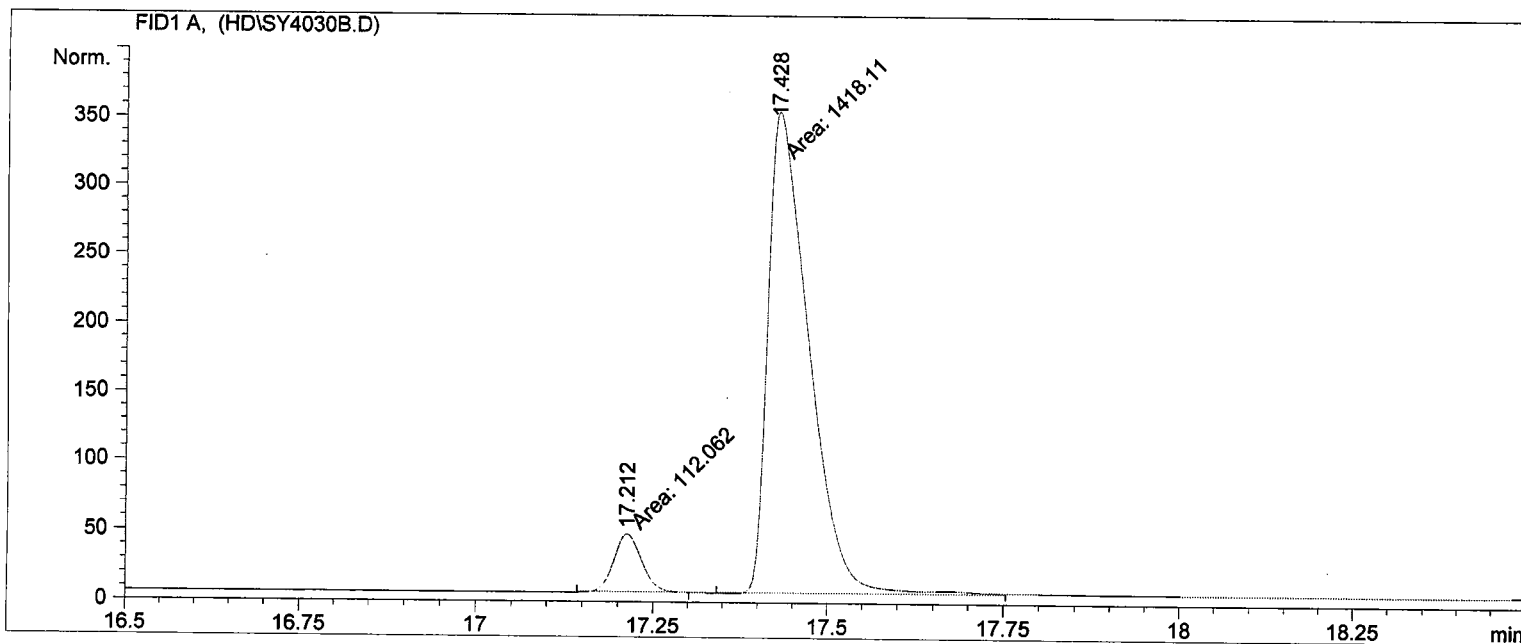

=====  
Area Percent Report  
=====

```

Sorted By      :      Signal
Multiplier     :      1.0000
Dilution       :      1.0000
Use Multiplier & Dilution Factor with ISTDs
    
```

Signal 1: FID1 A,

| Peak # | RetTime [min] | Type | Width [min] | Area [pA*s] | Height [pA] | Area %   |
|--------|---------------|------|-------------|-------------|-------------|----------|
| 1      | 17.212        | MM   | 0.0453      | 112.06217   | 41.26473    | 7.32348  |
| 2      | 17.428        | MM   | 0.0678      | 1418.11487  | 348.77933   | 92.67652 |

Totals :                            1530.17704    390.04406

Results obtained with enhanced integrator!

=====  
Summed Peaks Report  
=====

Signal 1: FID1 A,

=====  
Final Summed Peaks Report  
=====

Signal 1: FID1 A,



```

=====
Injection Date   : 12/2/2011 2:16:51 PM      Seq. Line   :    4
Sample Name     :                          Location    : Vial 2
Acq. Operator   : CC                        Inj         :    1
Acq. Instrument : Instrument 3               Inj Volume  : 1 µl
Different Inj Volume from Sequence !      Actual Inj Volume : 3 µl
Acq. Method     : C:\HPCHEM\3\METHODS\AU105115.M
Last changed    : 6/10/2008 10:06:18 AM by BJ
Analysis Method : C:\HPCHEM\3\METHODS\SY90115.M
Last changed    : 12/27/2011 6:15:42 PM by HD
                  (modified after loading)
=====
    
```

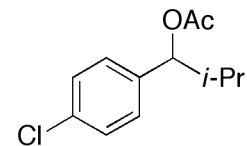

Table 1, entry 5  
with (+)-C<sub>5</sub>Ph<sub>5</sub>-DMAP\*

Initial test

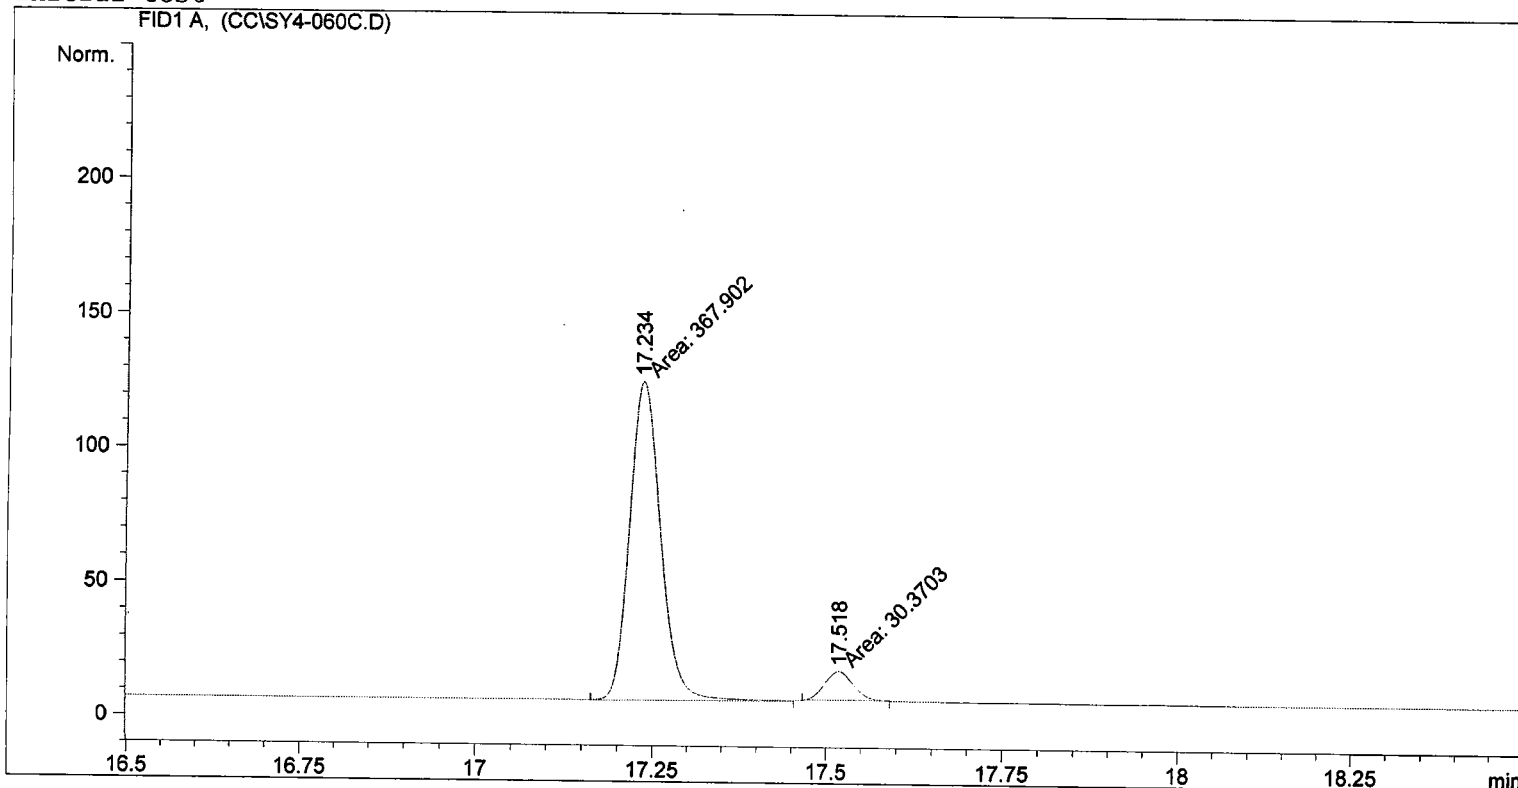

=====  
Area Percent Report  
=====

```

Sorted By      :      Signal
Multiplier     :      1.0000
Dilution       :      1.0000
Use Multiplier & Dilution Factor with ISTDs
    
```

Signal 1: FID1 A,

| Peak # | RetTime [min] | Type | Width [min] | Area [pA*s] | Height [pA] | Area %   |
|--------|---------------|------|-------------|-------------|-------------|----------|
| 1      | 17.234        | MM   | 0.0516      | 367.90179   | 118.76257   | 92.37450 |
| 2      | 17.518        | MM   | 0.0468      | 30.37025    | 10.82276    | 7.62550  |

Totals :                    398.27205   129.58533

Results obtained with enhanced integrator!

=====  
\*\*\* End of Report \*\*\*

```

=====
Injection Date   : 11/25/2011 8:01:16 PM      Seq. Line   :    5
Sample Name     :                               Location    : Vial 2
Acq. Operator   : SN                          Inj         :    1
Acq. Instrument : Instrument 3                 Inj Volume  : 1 µl
Different Inj Volume from Sequence !          Actual Inj Volume : 3 µl
Acq. Method     : C:\HPCHEM\3\METHODS\SY105115.M
Last changed    : 11/24/2011 12:17:48 PM by jc
Analysis Method : C:\HPCHEM\3\METHODS\COOLDOWN.M
Last changed    : 4/19/2012 3:17:34 PM by hc
                  (modified after loading)
=====
    
```

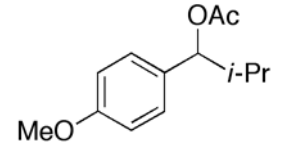

Table 1, entry 6  
with (-)-C<sub>5</sub>Ph<sub>5</sub>-DMAP\*

standby

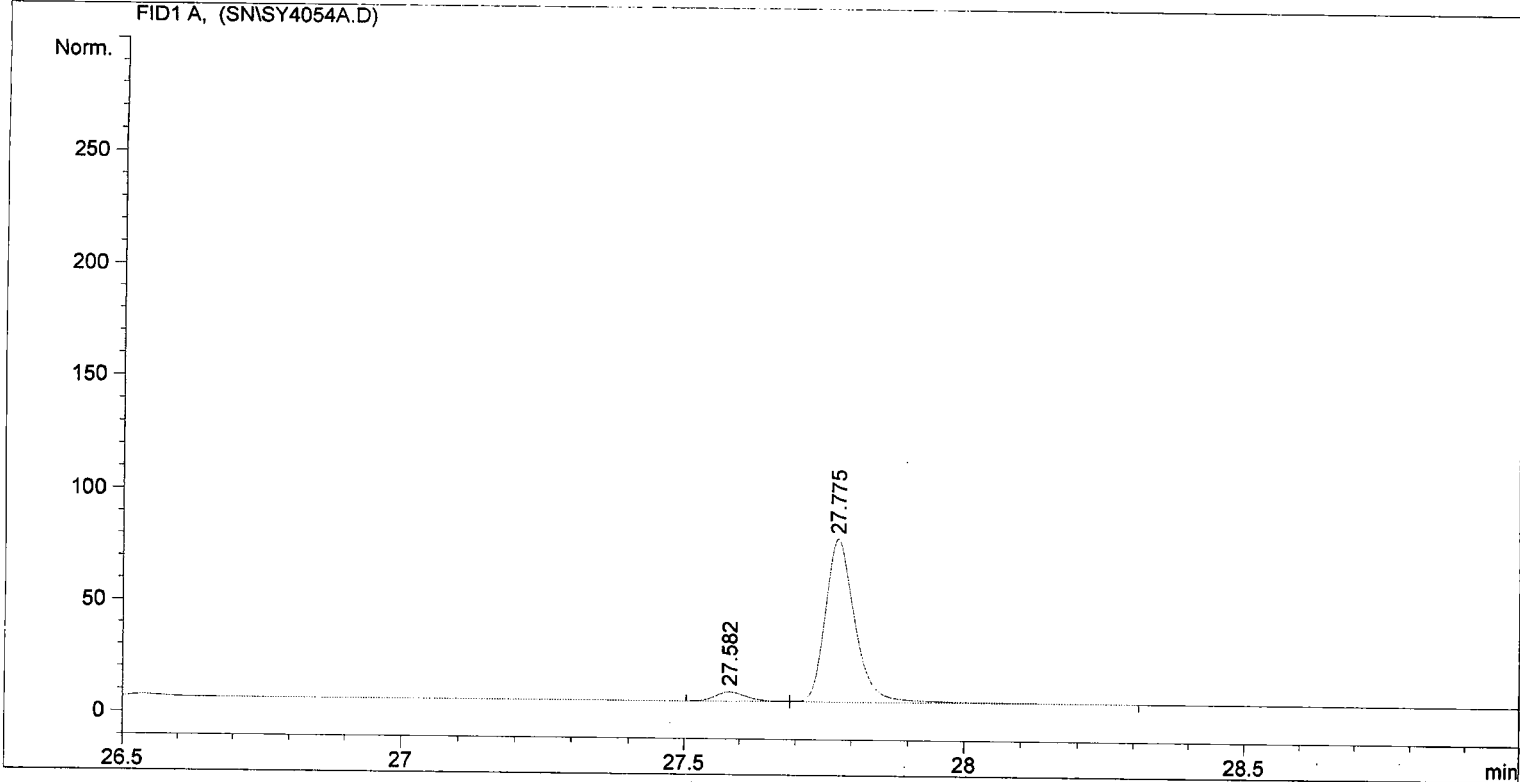

=====  
Area Percent Report  
=====

```

Sorted By      :      Signal
Multiplier     :      1.0000
Dilution       :      1.0000
Use Multiplier & Dilution Factor with ISTDs
    
```

Signal 1: FID1 A,

| Peak # | RetTime [min] | Type | Width [min] | Area [pA*s] | Height [pA] | Area %   |
|--------|---------------|------|-------------|-------------|-------------|----------|
| 1      | 27.582        | PV   | 0.0603      | 16.20505    | 4.08384     | 5.61661  |
| 2      | 27.775        | VB   | 0.0557      | 272.31488   | 72.77936    | 94.38339 |

Totals :                      288.51993    76.86319

Results obtained with enhanced integrator!

=====  
Summed Peaks Report  
=====

Signal 1: FID1 A,

```

=====
Injection Date   : 12/3/2011 12:36:06 PM      Seq. Line   :    9
Sample Name     :                               Location    : Vial 2
Acq. Operator   : CC                          Inj         :    1
Acq. Instrument : Instrument 3                 Inj Volume  : 1 µl
Different Inj Volume from Sequence !         Actual Inj Volume : 3 µl
Acq. Method     : C:\HPCHEM\3\METHODS\SY105115.M
Last changed    : 11/24/2011 12:17:48 PM by jc
Analysis Method : C:\HPCHEM\3\METHODS\SY90115.M
Last changed    : 12/27/2011 6:23:02 PM by HD
                  (modified after loading)
    
```

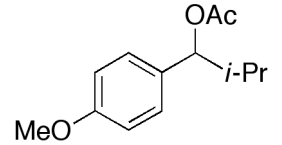

Table 1, entry 6  
with (+)-C<sub>5</sub>Ph<sub>5</sub>-DMAP\*

Initial test

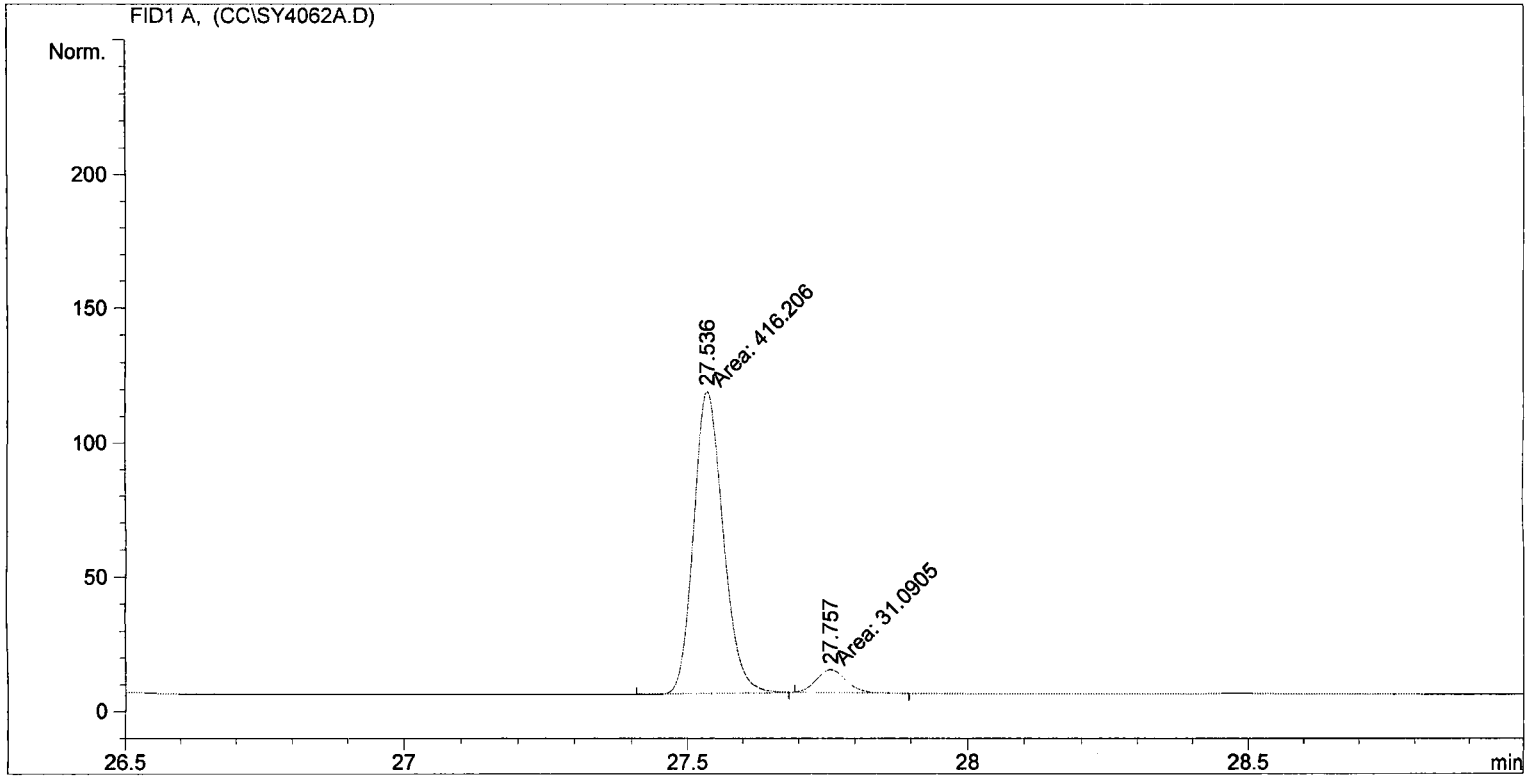

=====  
Area Percent Report  
=====

```

Sorted By       :      Signal
Multiplier      :      1.0000
Dilution        :      1.0000
Use Multiplier & Dilution Factor with ISTDs
    
```

Signal 1: FID1 A,

| Peak # | RetTime [min] | Type | Width [min] | Area [pA*s] | Height [pA] | Area %   |
|--------|---------------|------|-------------|-------------|-------------|----------|
| 1      | 27.536        | MM   | 0.0617      | 416.20593   | 112.49719   | 93.04924 |
| 2      | 27.757        | MM   | 0.0609      | 31.09052    | 8.51014     | 6.95076  |

Totals :                                   447.29645   121.00733

Results obtained with enhanced integrator!

=====  
\*\*\* End of Report \*\*\*

```

=====
Injection Date   : 12/28/2011 4:36:13 PM      Seq. Line   : 12
Sample Name     :                               Location    : Vial 4
Acq. Operator  : HD                           Inj         : 1
Acq. Instrument : Instrument 3                 Inj Volume  : 1 µl
Different Inj Volume from Sequence !         Actual Inj Volume : 2 µl
Acq. Method    : C:\HPCHEM\3\METHODS\SY105115.M
Last changed   : 12/27/2011 7:22:35 PM by HD
Analysis Method : C:\HPCHEM\3\METHODS\SY100ISA.M
Last changed   : 12/28/2011 6:12:44 PM by HD
                (modified after loading)
    
```

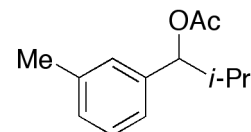

Table 1, entry 7  
with (-)-C<sub>5</sub>Ph<sub>5</sub>-DMAP\*

Initial test

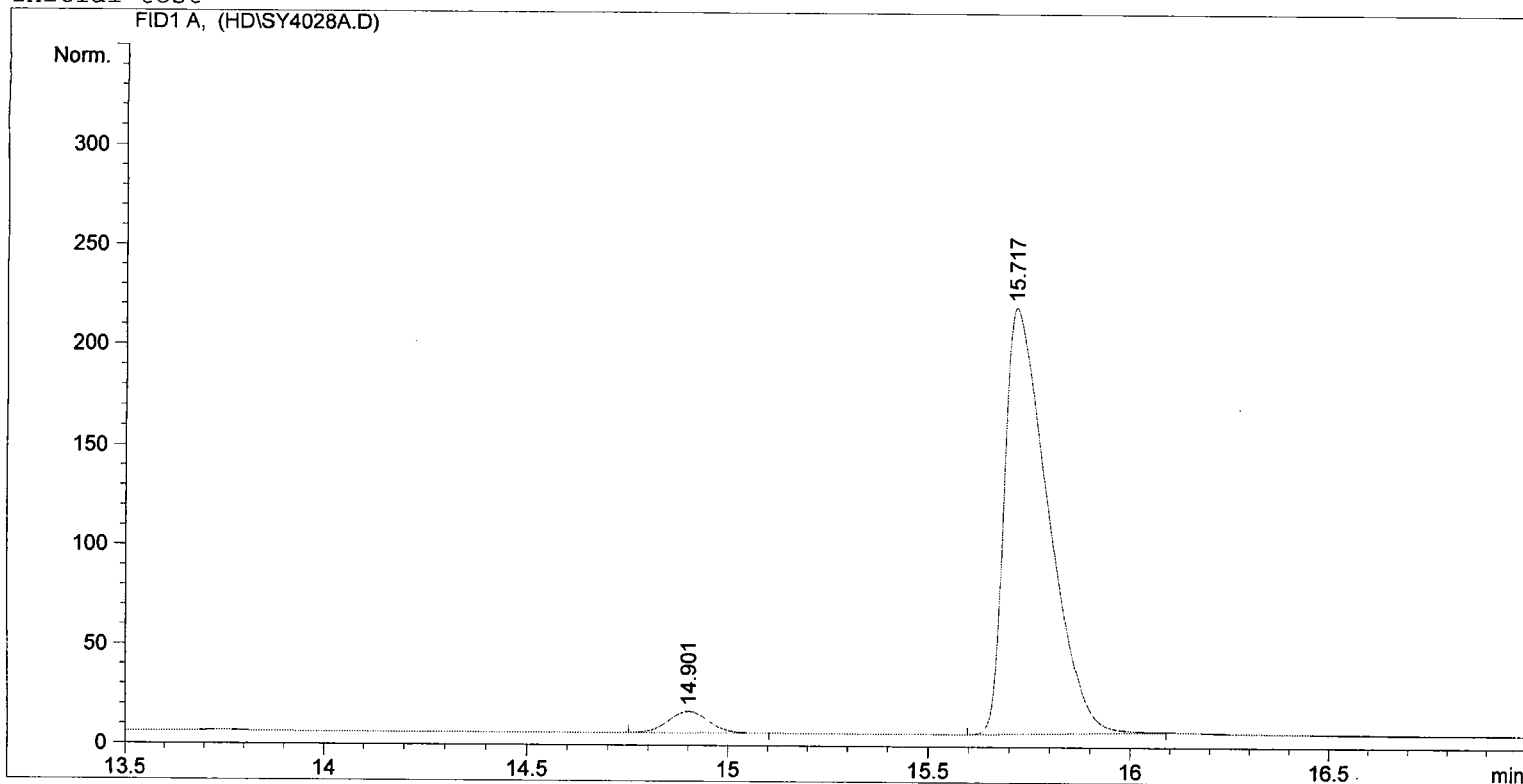

=====  
Area Percent Report  
=====

```

Sorted By      : Signal
Multiplier    : 1.0000
Dilution      : 1.0000
Use Multiplier & Dilution Factor with ISTDs
    
```

Signal 1: FID1 A,

| Peak # | RetTime [min] | Type | Width [min] | Area [pA*s] | Height [pA] | Area %   |
|--------|---------------|------|-------------|-------------|-------------|----------|
| 1      | 14.901        | BB   | 0.1087      | 75.04472    | 10.64902    | 4.48550  |
| 2      | 15.717        | PB   | 0.1104      | 1598.00769  | 213.32225   | 95.51450 |

Totals :                    1673.05241   223.97127

Results obtained with enhanced integrator!

=====  
\*\*\* End of Report \*\*\*

```

=====
Injection Date : 12/28/2011 5:12:40 PM      Seq. Line : 13
Sample Name    :                               Location  : Vial 5
Acq. Operator  : HD                           Inj       : 1
Acq. Instrument : Instrument 3                 Inj Volume: 1 µl
Different Inj Volume from Sequence !         Actual Inj Volume : 2 µl
Acq. Method    : C:\HPCHEM\3\METHODS\SY105115.M
Last changed   : 12/27/2011 7:22:35 PM by HD
Analysis Method : C:\HPCHEM\3\METHODS\SY100ISA.M
Last changed   : 12/28/2011 6:15:38 PM by HD
                (modified after loading)
    
```

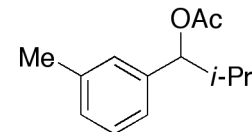

Table 1, entry 7  
with (+)-C<sub>5</sub>Ph<sub>5</sub>-DMAP\*

Initial test

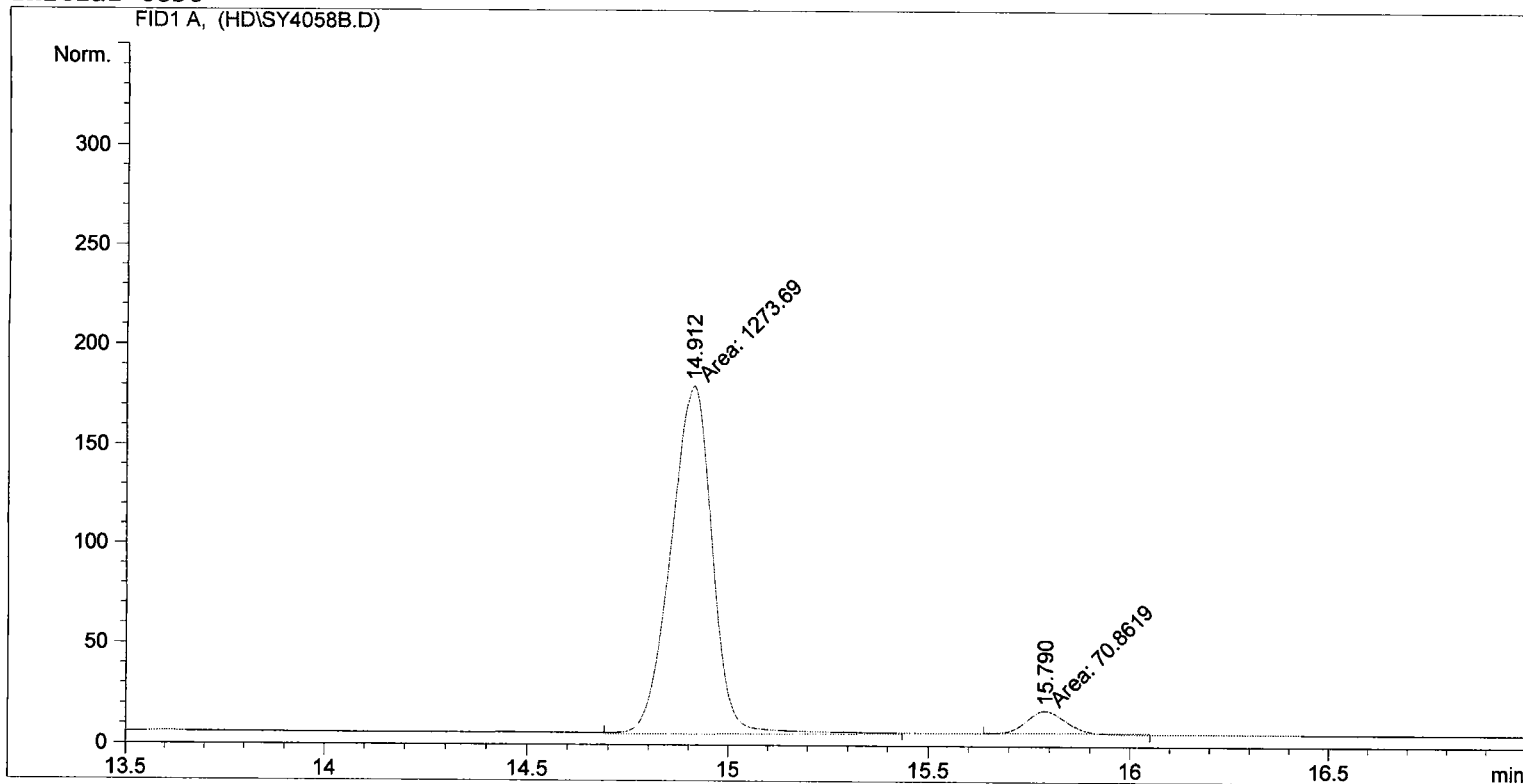

=====  
Area Percent Report  
=====

```

Sorted By      : Signal
Multiplier     : 1.0000
Dilution       : 1.0000
Use Multiplier & Dilution Factor with ISTDs
    
```

Signal 1: FID1 A,

| Peak # | RetTime [min] | Type | Width [min] | Area [pA*s] | Height [pA] | Area %   |
|--------|---------------|------|-------------|-------------|-------------|----------|
| 1      | 14.912        | MM   | 0.1215      | 1273.69214  | 174.75676   | 94.72971 |
| 2      | 15.790        | MM   | 0.1074      | 70.86195    | 10.99810    | 5.27029  |

Totals :                   1344.55408   185.75486

Results obtained with enhanced integrator!

=====  
\*\*\* End of Report \*\*\*

```

=====
Injection Date   : 12/27/2011 6:22:37 PM      Seq. Line   :    3
Sample Name     :                               Location    : Vial 5
Acq. Operator   : HD                           Inj         :    1
Acq. Instrument : Instrument 3                  Inj Volume  : 1 µl
Different Inj Volume from Sequence !          Actual Inj Volume : 3 µl
Acq. Method     : C:\HPCHEM\3\METHODS\SY90115.M
Last changed    : 12/27/2011 3:02:56 PM by HD
Analysis Method : C:\HPCHEM\3\METHODS\SY105130.M
Last changed    : 12/27/2011 7:18:21 PM by HD
                  (modified after loading)
=====

```

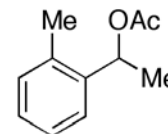

Table 1, entry 8  
with (-)-C<sub>5</sub>Ph<sub>5</sub>-DMAP\*

Initial test

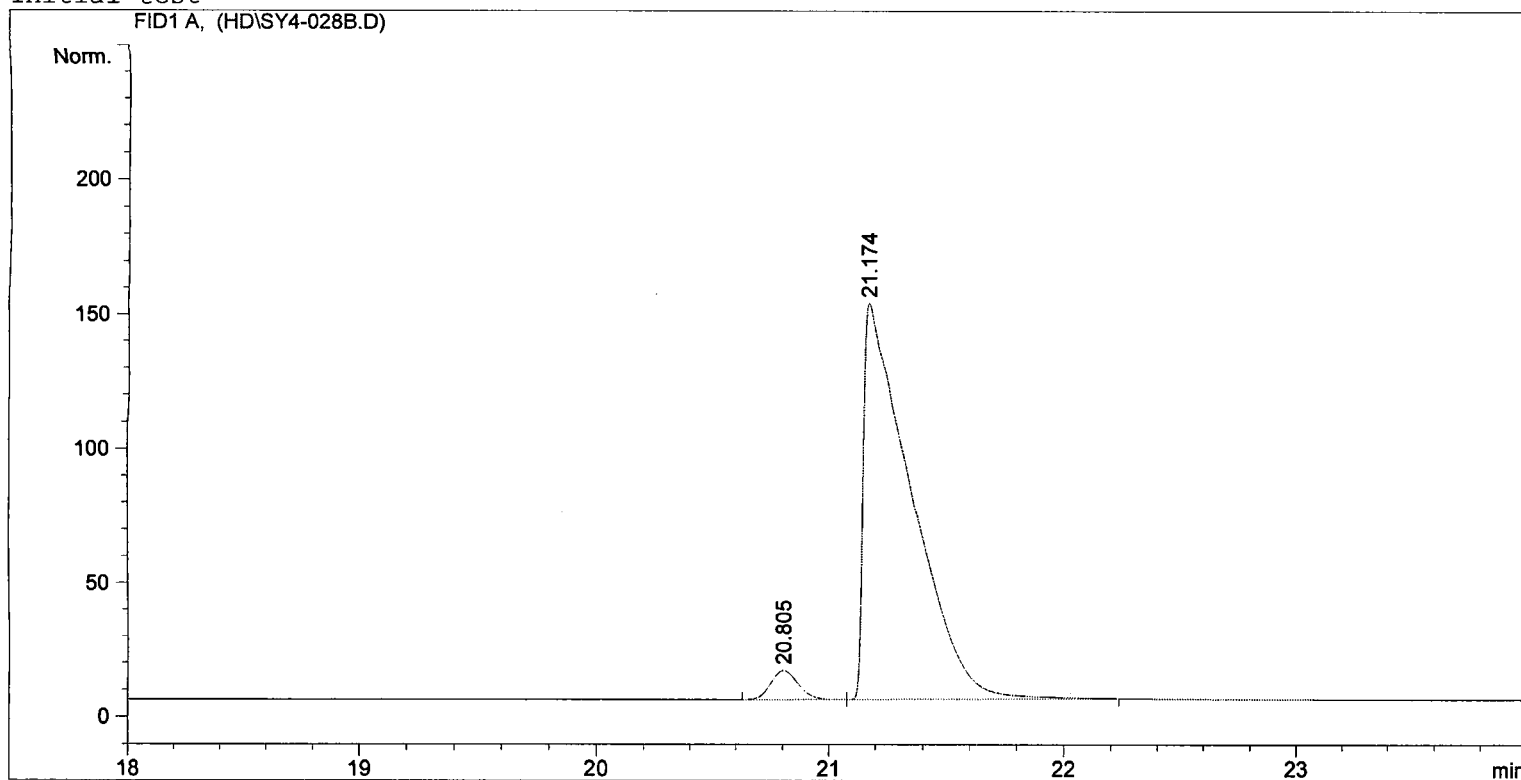

=====  
Area Percent Report  
=====

```

Sorted By       :      Signal
Multiplier     :      1.0000
Dilution       :      1.0000
Use Multiplier & Dilution Factor with ISTDs

```

Signal 1: FID1 A,

| Peak # | RetTime [min] | Type | Width [min] | Area [pA*s] | Height [pA] | Area %   |
|--------|---------------|------|-------------|-------------|-------------|----------|
| 1      | 20.805        | PP   | 0.1294      | 88.95095    | 10.76215    | 4.09658  |
| 2      | 21.174        | VB   | 0.1783      | 2082.39575  | 147.86237   | 95.90342 |

Totals :                                    2171.34670    158.62451

Results obtained with enhanced integrator!

=====  
\*\*\* End of Report \*\*\*

```

=====
Injection Date   : 12/27/2011 8:26:19 PM      Seq. Line   :    1
Sample Name     :                               Location    : Vial 3
Acq. Operator   : HD                          Inj         :    1
Acq. Instrument : Instrument 3                 Inj Volume  : 1 µl
Different Inj Volume from Sequence !          Actual Inj Volume : 3 µl
Acq. Method     : C:\HPCHEM\3\METHODS\SY90115.M
Last changed    : 12/27/2011 3:02:56 PM by HD
Analysis Method : C:\HPCHEM\3\METHODS\SY100ISA.M
Last changed    : 12/28/2011 1:42:35 PM by HD
                  (modified after loading)
=====
    
```

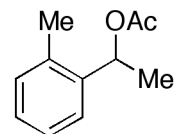

Table 1, entry 8  
with (+)-C<sub>5</sub>Ph<sub>5</sub>-DMAP\*

Initial test

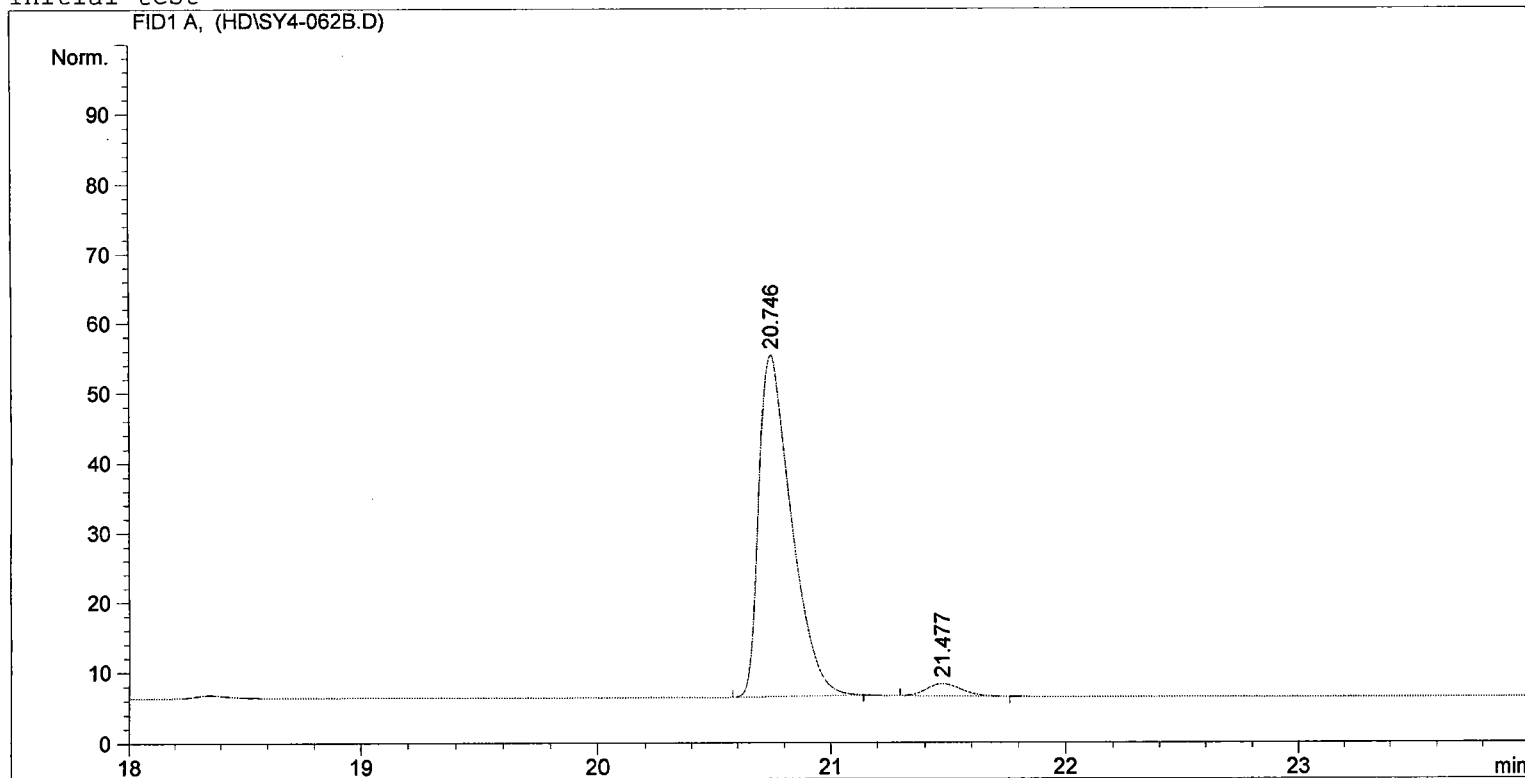

=====  
Area Percent Report  
=====

```

Sorted By      :      Signal
Multiplier     :      1.0000
Dilution       :      1.0000
Use Multiplier & Dilution Factor with ISTDs
    
```

Signal 1: FID1 A,

| Peak # | RetTime [min] | Type | Width [min] | Area [pA*s] | Height [pA] | Area %   |
|--------|---------------|------|-------------|-------------|-------------|----------|
| 1      | 20.746        | PB   | 0.1371      | 471.79797   | 48.86399    | 96.36722 |
| 2      | 21.477        | BP   | 0.1221      | 17.78549    | 1.73504     | 3.63278  |

Totals :                                    489.58346    50.59904

Results obtained with enhanced integrator!

=====  
\*\*\* End of Report \*\*\*

Injection Date : 11/25/2011 7:03:54 PM  
 Sample Name : JTM  
 Acq. Operator : JTM  
 Acq. Instrument : Instrument 1  
 Different Inj Volume from Sequence : Actual Inj Volume : 15 µl  
 Inj Volume : 1 µl  
 Acq. Method : C:\HPCHEM\1\METHODS\OD-01-60.M  
 Last changed : 11/25/2011 4:57:32 PM by NB  
 Analysis Method : C:\HPCHEM\1\METHODS\VL-AD08.M  
 Last changed : 12/27/2011 7:49:48 PM by JTM  
 (modified after loading)

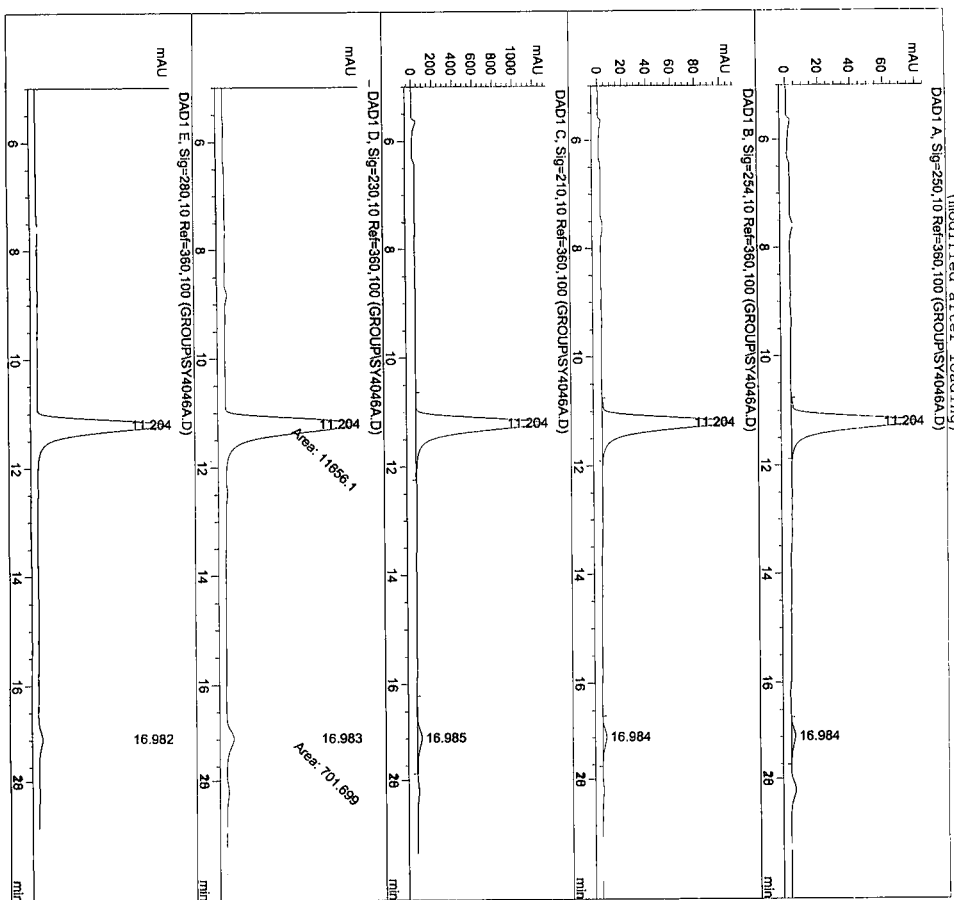

Area Percent Report  
 Sorted By : Signal  
 Multiplier : 1.0000  
 Dilution : 1.0000  
 Use Multiplier & Dilution Factor with ISTDs

Signal 1: DAD1 A, Sig=250,10 Ref=360,100

| Peak #   | RetTime [min] | Type | Width [min] | Area [mAU*s] | Height [mAU] | Area %  |
|----------|---------------|------|-------------|--------------|--------------|---------|
| 1        | 11.204        | BB   | 0.2482      | 1293.14844   | 78.50520     | 95.8974 |
| 2        | 16.984        | PB   | 0.3429      | 55.32301     | 2.41821      | 4.1026  |
| Totals : |               |      |             | 1348.47145   | 80.92342     |         |

Signal 2: DAD1 B, Sig=254,10 Ref=360,100

| Peak #   | RetTime [min] | Type | Width [min] | Area [mAU*s] | Height [mAU] | Area %  |
|----------|---------------|------|-------------|--------------|--------------|---------|
| 1        | 11.204        | BB   | 0.2474      | 1709.65356   | 104.23670    | 95.7928 |
| 2        | 16.984        | PB   | 0.3439      | 75.08683     | 3.19879      | 4.2072  |
| Totals : |               |      |             | 1784.74039   | 107.43549    |         |

Signal 3: DAD1 C, Sig=210,10 Ref=360,100

| Peak #   | RetTime [min] | Type | Width [min] | Area [mAU*s] | Height [mAU] | Area %  |
|----------|---------------|------|-------------|--------------|--------------|---------|
| 1        | 11.204        | VB   | 0.2630      | 2.1460164    | 1245.90479   | 94.7669 |
| 2        | 16.985        | VB   | 0.3941      | 1185.03430   | 45.16370     | 5.2331  |
| Totals : |               |      |             | 2.26451e4    | 1291.06848   |         |

Signal 4: DAD1 D, Sig=230,10 Ref=360,100

| Peak #   | RetTime [min] | Type | Width [min] | Area [mAU*s] | Height [mAU] | Area %  |
|----------|---------------|------|-------------|--------------|--------------|---------|
| 1        | 11.204        | NM   | 0.3314      | 1.16561e4    | 586.18079    | 94.3218 |
| 2        | 16.983        | NM   | 0.3784      | 701.69916    | 30.90495     | 5.6782  |
| Totals : |               |      |             | 1.23578e4    | 617.08573    |         |

Signal 5: DAD1 E, Sig=280,10 Ref=360,100

| Peak #   | RetTime [min] | Type | Width [min] | Area [mAU*s] | Height [mAU] | Area %  |
|----------|---------------|------|-------------|--------------|--------------|---------|
| 1        | 11.204        | BB   | 0.2462      | 4694.26367   | 287.88928    | 95.8319 |
| 2        | 16.982        | BB   | 0.3586      | 204.17297    | 8.73924      | 4.1681  |
| Totals : |               |      |             | 4898.43665   | 296.62852    |         |

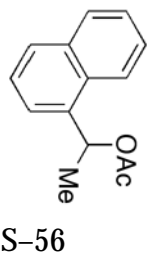

Table 1, entry 9  
 with (-)-C<sub>9</sub>Ph<sub>5</sub>-DMAP\*



Injection Date : 1/13/2012 2:31:26 PM  
 Sample Name : JTM  
 Acq. Operator : Instrument 1  
 Acq. Instrument : Instrument 1  
 Different Inj Volume from Sequence : Actual Inj Volume : 15 µl  
 Acq. Method : C:\HPCHEM\1\METHODS\OD-01-40.M  
 Last Changed : 8/17/2010 4:39:48 PM by JTM  
 Analysis Method : C:\HPCHEM\1\METHODS\OD-10-40.M  
 Last Changed : 4/16/2012 1:52:26 PM by CE  
 (modified after loading)

Seq. Line : 2  
 Location : Vial 1  
 Inj : 1  
 Inj Volume : 15 µl

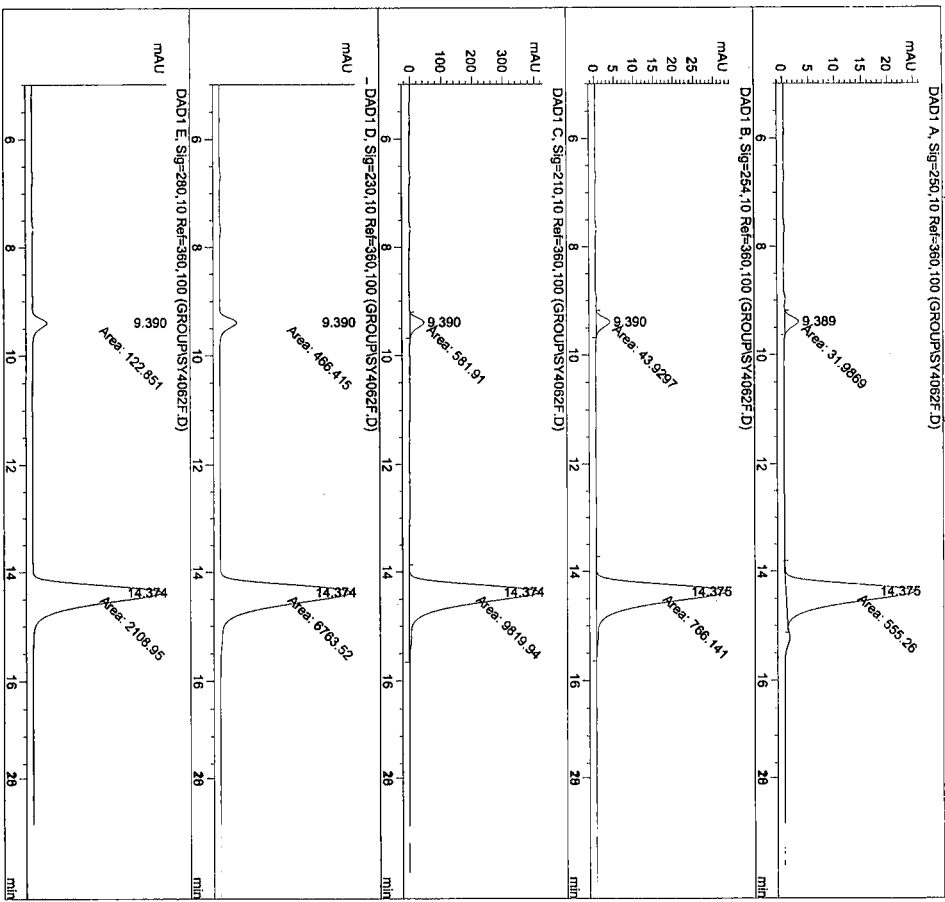

Area Percent Report  
 Sorted By : Signal  
 Multiplier : 1.0000  
 Dilution : 1.0000  
 Use Multiplier & Dilution Factor with ISTRS

Signal 1: DAD1 A, Sig=250,10 Ref=360,100

| Peak #   | RetTime [min] | Type | Width [min] | Area [mAU*s] | Height [mAU] | Area %  |
|----------|---------------|------|-------------|--------------|--------------|---------|
| 1        | 9.389         | MM   | 0.2057      | 31.98688     | 2.59194      | 5.4469  |
| 2        | 14.375        | MM   | 0.3774      | 555.26025    | 24.52152     | 94.5531 |
| Totals : |               |      |             | 587.24713    | 27.11346     |         |

Signal 2: DAD1 B, Sig=254,10 Ref=360,100

| Peak #   | RetTime [min] | Type | Width [min] | Area [mAU*s] | Height [mAU] | Area %  |
|----------|---------------|------|-------------|--------------|--------------|---------|
| 1        | 9.390         | MM   | 0.2120      | 43.92972     | 3.45371      | 5.4229  |
| 2        | 14.375        | MM   | 0.3905      | 766.14087    | 32.69531     | 94.5771 |
| Totals : |               |      |             | 810.07059    | 36.14901     |         |

Signal 3: DAD1 C, Sig=210,10 Ref=360,100

| Peak #   | RetTime [min] | Type | Width [min] | Area [mAU*s] | Height [mAU] | Area %  |
|----------|---------------|------|-------------|--------------|--------------|---------|
| 1        | 9.390         | MM   | 0.2145      | 581.91028    | 45.20829     | 5.5943  |
| 2        | 14.374        | MM   | 0.3936      | 9819.93750   | 415.82935    | 94.4057 |
| Totals : |               |      |             | 1.04018e4    | 461.03764    |         |

Signal 4: DAD1 D, Sig=230,10 Ref=360,100

| Peak #   | RetTime [min] | Type | Width [min] | Area [mAU*s] | Height [mAU] | Area %  |
|----------|---------------|------|-------------|--------------|--------------|---------|
| 1        | 9.390         | MM   | 0.2201      | 466.41537    | 35.31659     | 6.4512  |
| 2        | 14.374        | MM   | 0.4124      | 6763.52100   | 273.33804    | 93.5488 |
| Totals : |               |      |             | 7229.93637   | 308.65463    |         |

Signal 5: DAD1 E, Sig=280,10 Ref=360,100

| Peak #   | RetTime [min] | Type | Width [min] | Area [mAU*s] | Height [mAU] | Area %  |
|----------|---------------|------|-------------|--------------|--------------|---------|
| 1        | 9.390         | MM   | 0.2165      | 122.85142    | 9.45809      | 5.5046  |
| 2        | 14.374        | MM   | 0.3907      | 2108.95215   | 89.95865     | 94.4954 |
| Totals : |               |      |             | 2231.80357   | 99.41774     |         |

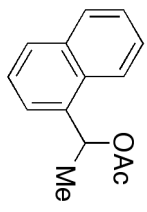

Table 1, entry 9  
 with (+)-C<sub>9</sub>Ph<sub>5</sub>-DMAP<sup>+</sup>

Injection Date : 11/12/2011 12:04:53 PM
Sample Name : SN
Acq. Operator : SN
Acq. Instrument : Instrument 1
Different Inj Volume from Sequence : Actual Inj Volume : 5 µl
Acq. Method : C:\HPCHEM\1\METHODS\ODH-0130.M
Last changed : 8/3/2011 6:13:51 PM by JTM
Analysis Method : C:\HPCHEM\1\METHODS\SNIA0125.M
Last changed : 12/27/2011 7:59:40 PM by SN

Seq. Line : 2
Location : Vial 63

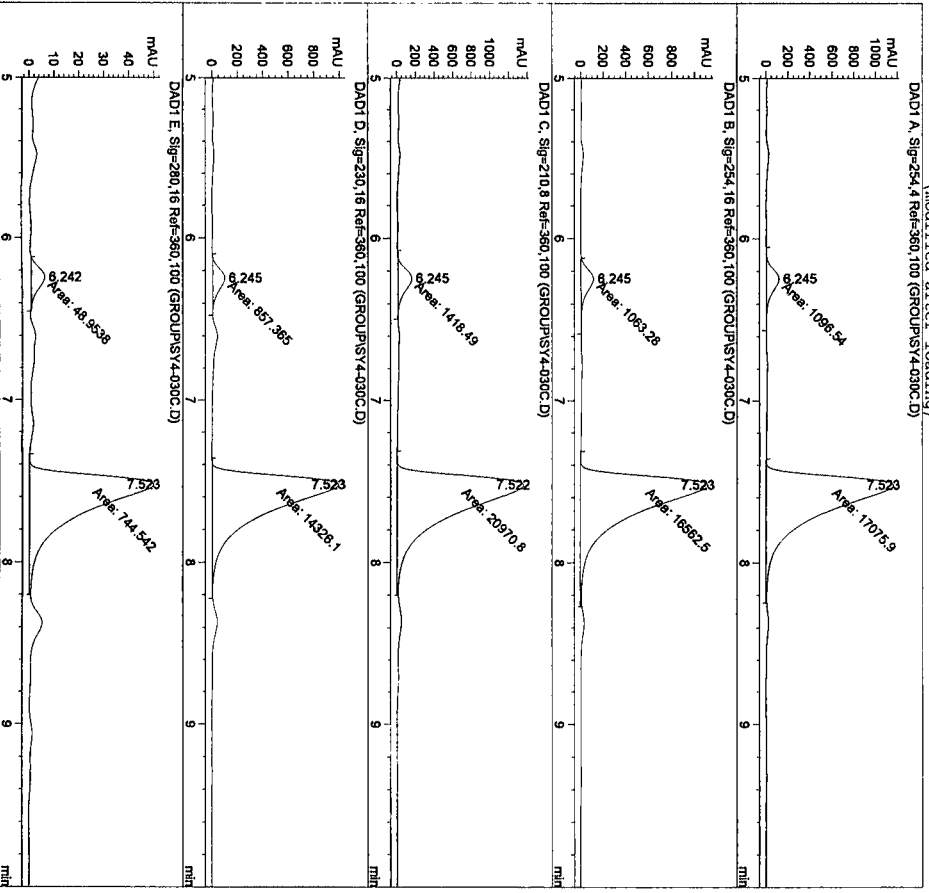

Area Percent Report

Sorted By : Signal
Multiplier : 1.0000
Dilution : 1.0000
Use Multiplier & Dilution Factor with ISTDs

Table with 5 columns: Peak RetTime [min], Width [min], Area [mAU\*s], Height [mAU], Area %. Data for Signal 1: DAD1 A, Sig=254,4 Ref=360,100.

Table with 5 columns: Peak RetTime [min], Width [min], Area [mAU\*s], Height [mAU], Area %. Data for Signal 2: DAD1 B, Sig=254,16 Ref=360,100.

Table with 5 columns: Peak RetTime [min], Width [min], Area [mAU\*s], Height [mAU], Area %. Data for Signal 3: DAD1 C, Sig=210,8 Ref=360,100.

Table with 5 columns: Peak RetTime [min], Width [min], Area [mAU\*s], Height [mAU], Area %. Data for Signal 4: DAD1 D, Sig=230,16 Ref=360,100.

Table with 5 columns: Peak RetTime [min], Width [min], Area [mAU\*s], Height [mAU], Area %. Data for Signal 5: DAD1 E, Sig=280,16 Ref=360,100.

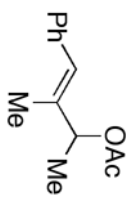

Table 1, entry 10
with (-)-C5Ph5-DMAP\*

Injection Date : 12/8/2011 12:22:44 AM  
 Sample Name : JTM  
 Acq. Operator : JTM  
 Acq. Instrument : Instrument 1  
 Different Inj Volume from Sequence : Actual Inj Volume : 15 µl  
 Acq. Method : C:\HPCHEM\1\METHODS\OD-01-30.M  
 Last changed : 4/7/2011 2:40:51 AM by CC  
 Analysis Method : C:\HPCHEM\1\METHODS\YL-AD07.M  
 Last changed : 12/27/2011 8:21:33 PM by JTM

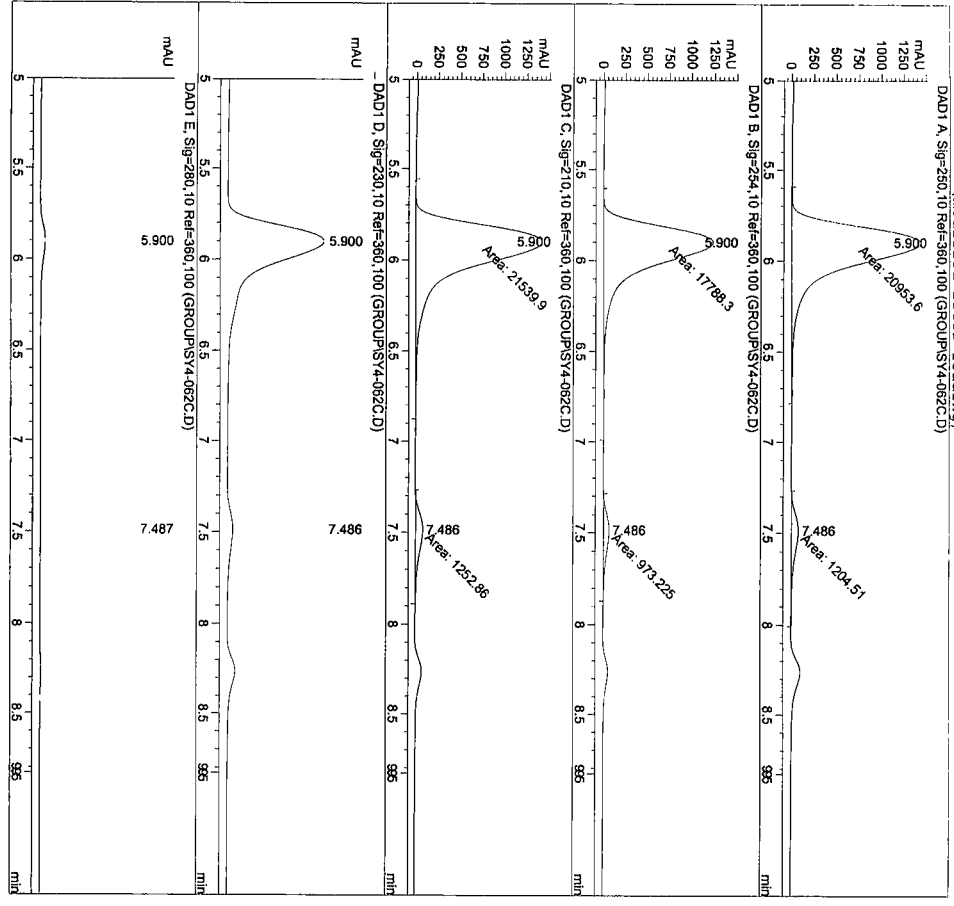

Area Percent Report  
 Sorted By : Signal  
 Multiplier : 1.0000  
 Dilution : 1.0000  
 Use Multiplier & Dilution Factor with ISTDs

Signal 1: DAD1 A, Sig=250,10 Ref=360,100

| Peak #                        | RetTime [min] | Type | Width [min] | Area [mAU*s] | Height [mAU] | Area %  |
|-------------------------------|---------------|------|-------------|--------------|--------------|---------|
| 1                             | 5.900         | MM   | 0.2418      | 2.0953664    | 1444.29919   | 94.5640 |
| 2                             | 7.486         | MM   | 0.2629      | 1204.50964   | 76.36211     | 5.4360  |
| Totals : 2.21581e4 1520.66131 |               |      |             |              |              |         |

Signal 2: DAD1 B, Sig=254,10 Ref=360,100

| Peak #                        | RetTime [min] | Type | Width [min] | Area [mAU*s] | Height [mAU] | Area %  |
|-------------------------------|---------------|------|-------------|--------------|--------------|---------|
| 1                             | 5.900         | MM   | 0.2407      | 1.7788364    | 1231.64832   | 94.8127 |
| 2                             | 7.486         | MM   | 0.2537      | 973.22461    | 63.92531     | 5.1873  |
| Totals : 1.87616e4 1295.57362 |               |      |             |              |              |         |

Signal 3: DAD1 C, Sig=210,10 Ref=360,100

| Peak #                        | RetTime [min] | Type | Width [min] | Area [mAU*s] | Height [mAU] | Area %  |
|-------------------------------|---------------|------|-------------|--------------|--------------|---------|
| 1                             | 5.900         | MM   | 0.2526      | 2.153964     | 1420.97913   | 94.5033 |
| 2                             | 7.486         | MM   | 0.2553      | 1252.85693   | 81.78120     | 5.4967  |
| Totals : 2.27927e4 1502.76032 |               |      |             |              |              |         |

Signal 4: DAD1 D, Sig=230,10 Ref=360,100

| Peak #                        | RetTime [min] | Type | Width [min] | Area [mAU*s] | Height [mAU] | Area %  |
|-------------------------------|---------------|------|-------------|--------------|--------------|---------|
| 1                             | 5.900         | BB   | 0.2265      | 1.5909664    | 1076.05347   | 94.1519 |
| 2                             | 7.486         | PP   | 0.2571      | 988.19049    | 59.09837     | 5.8481  |
| Totals : 1.68978e4 1135.15183 |               |      |             |              |              |         |

Signal 5: DAD1 E, Sig=280,10 Ref=360,100

| Peak #                      | RetTime [min] | Type | Width [min] | Area [mAU*s] | Height [mAU] | Area %  |
|-----------------------------|---------------|------|-------------|--------------|--------------|---------|
| 1                           | 5.900         | BB   | 0.2255      | 767.51825    | 52.22518     | 94.1434 |
| 2                           | 7.487         | BP   | 0.2459      | 47.74647     | 3.02838      | 5.8566  |
| Totals : 815.26472 55.25356 |               |      |             |              |              |         |

Table 1, entry 10  
 with (+)-C<sub>5</sub>Ph<sub>5</sub>-DMAP\*

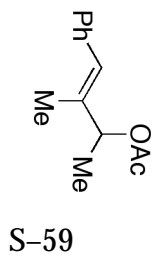

Injection Date : 1/22/2012 7:29:46 PM      Seq. Line : 1  
 Sample Name :                                      Location : Vial 11  
 Acq. Operator : JTM                                      Inj : 1  
 Acq. Instrument : Instrument 1                      Inj Volume : 5 µl  
 Different Inj Volume from Sequence :              Dilution : 1.000  
 Acq. Method : C:\HPCHEM\1\METHODS\ODH-0540.M      Use Multiplier & Dilution Factor with ISTDs  
 Last changed : 9/7/2011 9:23:44 AM by SN  
 Analysis Method : C:\HPCHEM\1\METHODS\VI-ADD08.M  
 Last changed : 4/19/2012 1:41:14 PM by JTM

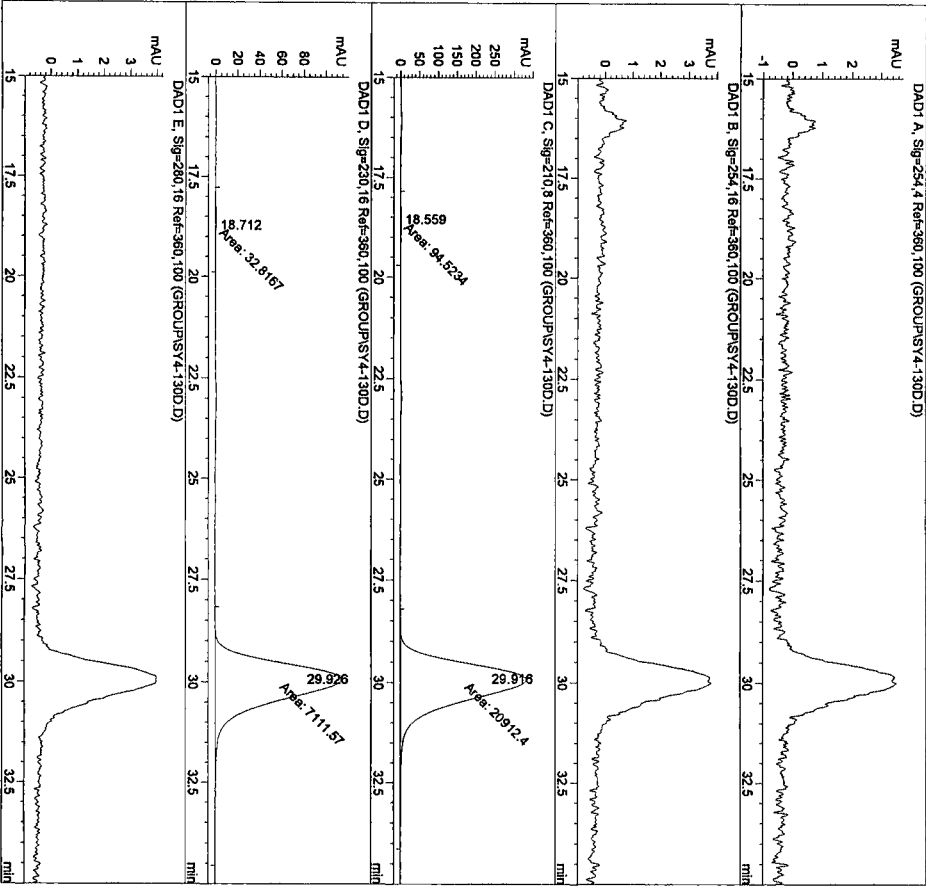

Area Percent Report  
 Sorted By : Signal  
 Multiplier : 1.0000  
 Dilution : 1.0000  
 Use Multiplier & Dilution Factor with ISTDs

Signal 1: DAD1 A, Sig=254,4 Ref=360,100

Signal 2: DAD1 B, Sig=254,16 Ref=360,100

Signal 3: DAD1 C, Sig=210,8 Ref=360,100

Signal 4: DAD1 D, Sig=230,16 Ref=360,100

| Peak #   | RetTime [min] | Type | Width [min] | Area [mAU*s] | Height [mAU] | Area %  |
|----------|---------------|------|-------------|--------------|--------------|---------|
| 1        | 18.559        | MM   | 0.8222      | 94.52335     | 1.91597      | 0.4500  |
| 2        | 29.916        | MM   | 1.0443      | 2.09124e4    | 333.75858    | 99.5500 |
| Totals : |               |      |             | 2.10069e4    | 335.67454    |         |

Results obtained with enhanced integrator!

Signal 4: DAD1 D, Sig=230,16 Ref=360,100

| Peak #   | RetTime [min] | Type | Width [min] | Area [mAU*s] | Height [mAU] | Area %  |
|----------|---------------|------|-------------|--------------|--------------|---------|
| 1        | 18.712        | MM   | 0.8052      | 32.81665     | 6.79271e-1   | 0.4593  |
| 2        | 29.926        | MM   | 1.0365      | 7111.57129   | 114.34914    | 99.5407 |
| Totals : |               |      |             | 7144.38794   | 115.02841    |         |

Results obtained with enhanced integrator!

Signal 5: DAD1 E, Sig=280,16 Ref=360,100

\*\*\* End of Report \*\*\*

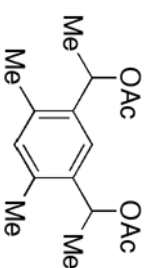

with (-)-C<sub>6</sub>Ph<sub>5</sub>-DMAP<sup>+</sup>

Injection Date : 4/19/2012 10:40:12 AM Seq. Line : 46  
 Sample Name : JTM Location : Vial 22  
 Acq. Operator : JTM Inj : 1  
 Acq. Instrument : Instrument 1 Inj Volume : 5 µl  
 Acq. Method : C:\HPCHEM\1\METHODS\OPH-0540.M  
 Last changed : 9/7/2011 9:23:44 AM by SN  
 Analysis Method : C:\HPCHEM\1\METHODS\YI-AD08.M  
 Last changed : 4/19/2012 1:40:50 PM by JTM  
 (modified after loading)

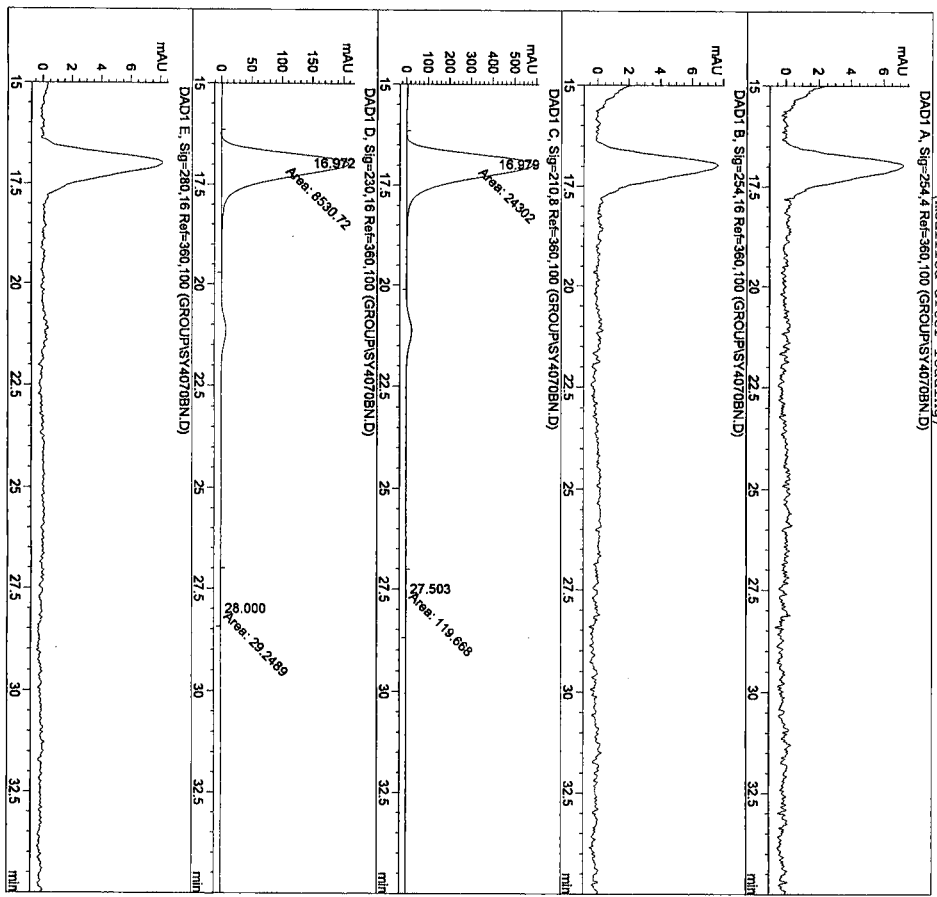

Area Percent Report  
 Sorted By : Signal  
 Multiplier : 1.0000  
 Dilution : 1.0000  
 Use Multiplier & Dilution Factor with ISTDs

Signal 1: DAD1 A, Sig=254,4 Ref=360,100

Signal 2: DAD1 B, Sig=254,16 Ref=360,100

Signal 3: DAD1 C, Sig=210,8 Ref=360,100

| Peak # | RetTime [min] | Type | Width [min] | Area [mAU*s] | Height [mAU] | Area %  |
|--------|---------------|------|-------------|--------------|--------------|---------|
| 1      | 16.979        | MM   | 0.6942      | 2.43020e4    | 583.45728    | 99.5100 |
| 2      | 27.503        | MM   | 0.9062      | 119.66791    | 2.20082      | 0.4900  |

Totals : 2.4421e4 585.65809

Results obtained with enhanced integrator!

Signal 4: DAD1 D, Sig=230,16 Ref=360,100

| Peak # | RetTime [min] | Type | Width [min] | Area [mAU*s] | Height [mAU] | Area %  |
|--------|---------------|------|-------------|--------------|--------------|---------|
| 1      | 16.972        | MM   | 0.6832      | 8530.72363   | 208.09496    | 99.6583 |
| 2      | 28.000        | MM   | 0.8272      | 29.24886     | 5.89296e-1   | 0.3417  |

Totals : 8559.97249 208.68425

Results obtained with enhanced integrator!

Signal 5: DAD1 E, Sig=280,16 Ref=360,100

\*\*\* End of Report \*\*\*

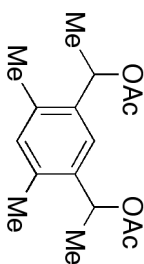

eq 10

With (+)-C<sub>9</sub>Ph<sub>5</sub>-DMAP\*
